# Supplementary material
Source: PubMed Central journal article supplement (PMC3297690)
Supplement: NIHMS347545-supplement-1.pdf [file NIHMS347545-supplement-1.pdf]

**Supplemental Table 2:** Adjusted and unadjusted GSA results for US, UK and combined GSA for all cases and HGS cases. Results are presented for the top 1000 gene sets from the combined HGS case GSA.

| GS ID      | GS Source  | GS Name                                                  | GSA of North American GWAS |                     |                       |                     | GSA of UK GWAS        |                     |                       |                     | Combined GSA          |                     |                       |                     |
|------------|------------|----------------------------------------------------------|----------------------------|---------------------|-----------------------|---------------------|-----------------------|---------------------|-----------------------|---------------------|-----------------------|---------------------|-----------------------|---------------------|
|            |            |                                                          | All Cases; Unadjusted      | All Cases; Adjusted | HGS Cases; Unadjusted | HGS Cases; Adjusted | All Cases; Unadjusted | All Cases; Adjusted | HGS Cases; Unadjusted | HGS Cases; Adjusted | All Cases; Unadjusted | All Cases; Adjusted | HGS Cases; Unadjusted | HGS Cases; Adjusted |
| GO:0023034 | GO:Bio L4  | intracellular signaling pathway                          | 8.6E-02                    | 4.0E-02             | 1.7E-03               | 2.5E-02             | 2.9E-02               | 3.8E-02             | 3.3E-03               | 4.8E-01             | 1.7E-02               | 1.1E-02             | 7.3E-05               | 6.4E-02             |
| GO:0090109 | GO:Bio L4  | regulation of cell-substrate junction assembly           | 6.3E-02                    | 7.6E-02             | 3.6E-02               | 5.0E-02             | 4.8E-01               | 5.6E-02             | 1.0E-03               | 4.5E-01             | 1.3E-01               | 2.7E-02             | 4.0E-04               | 1.1E-01             |
| GO:0048646 | GO:Bio L4  | anatomical structure formation involved in morphogenesis | 1.5E-02                    | 2.2E-02             | 4.0E-04               | 1.8E-03             | 1.5E-01               | 1.6E-02             | 1.2E-01               | 7.2E-01             | 1.7E-02               | 3.1E-03             | 5.3E-04               | 1.0E-02             |
| GO:0031968 | GO:Cell L4 | organelle outer membrane                                 | 6.0E-01                    | 6.3E-01             | 2.7E-01               | 1.7E-01             | 3.4E-01               | 4.1E-01             | 2.0E-04               | 2.5E-01             | 5.3E-01               | 6.0E-01             | 5.8E-04               | 1.7E-01             |
| GO:0051895 | GO:Bio L4  | negative regulation of focal adhesion assembly           | 1.9E-01                    | 2.5E-01             | 1.7E-02               | 3.3E-02             | 8.7E-01               | 9.4E-01             | 3.1E-03               | 8.6E-01             | 4.7E-01               | 5.8E-01             | 5.8E-04               | 1.3E-01             |
| GO:0005527 | GO:Mole L4 | macrolide binding                                        | 1.6E-02                    | 2.3E-02             | 9.0E-04               | 2.0E-03             | 6.4E-03               | 9.2E-02             | 6.4E-02               | 9.4E-01             | 1.0E-03               | 1.5E-02             | 6.2E-04               | 1.4E-02             |
| GO:0016859 | GO:Mole L4 | cis-trans isomerase activity                             | 6.7E-02                    | 2.1E-01             | 1.5E-03               | 3.5E-03             | 2.9E-01               | 5.6E-01             | 4.7E-02               | 8.4E-01             | 9.6E-02               | 3.6E-01             | 7.5E-04               | 2.0E-02             |
| GO:0042483 | GO:Bio L4  | negative regulation of odontogenesis                     | 3.7E-01                    | 2.1E-01             | 1.6E-01               | 3.0E-01             | 2.6E-01               | 9.9E-02             | 5.0E-04               | 4.3E-01             | 3.2E-01               | 1.0E-01             | 8.2E-04               | 3.9E-01             |
| GO:0001649 | GO:Bio L4  | osteoblast differentiation                               | 3.4E-02                    | 1.6E-02             | 1.2E-01               | 9.5E-02             | 8.8E-02               | 4.6E-01             | 7.0E-04               | 5.3E-01             | 2.0E-02               | 4.2E-02             | 8.4E-04               | 2.0E-01             |
| GO:0009798 | GO:Bio L4  | axis specification                                       | 7.5E-01                    | 8.6E-01             | 1.8E-02               | 4.3E-02             | 8.8E-01               | 7.5E-01             | 5.8E-03               | 6.4E-01             | 9.4E-01               | 9.3E-01             | 1.0E-03               | 1.3E-01             |
| GO:0001917 | GO:Cell L4 | photoreceptor inner segment                              | 6.9E-01                    | 5.3E-01             | 5.3E-01               | 2.8E-01             | 2.3E-01               | 1.7E-01             | 2.0E-04               | 1.2E-01             | 4.5E-01               | 3.0E-01             | 1.1E-03               | 1.5E-01             |
| GO:0019867 | GO:Cell L4 | outer membrane                                           | 3.6E-01                    | 6.0E-01             | 2.7E-01               | 1.8E-01             | 3.5E-01               | 1.8E-01             | 4.0E-04               | 2.0E-01             | 3.9E-01               | 3.4E-01             | 1.1E-03               | 1.6E-01             |
| GO:0044092 | GO:Bio L4  | negative regulation of molecular function                | 5.0E-01                    | 4.9E-02             | 2.6E-02               | 8.0E-03             | 3.7E-02               | 1.4E-01             | 6.2E-03               | 4.5E-01             | 9.3E-02               | 4.1E-02             | 1.6E-03               | 2.4E-02             |
| GO:0060759 | GO:Bio L4  | regulation of response to cytokine stimulus              | 5.8E-01                    | 2.4E-01             | 4.5E-03               | 3.7E-03             | 7.1E-01               | 9.7E-01             | 3.9E-02               | 7.0E-01             | 7.7E-01               | 5.7E-01             | 1.7E-03               | 1.8E-02             |
| GO:0005070 | GO:Mole L4 | SH3/SH2 adaptor activity                                 | 9.3E-01                    | 9.3E-01             | 1.3E-01               | 3.0E-01             | 5.5E-01               | 7.7E-01             | 1.4E-03               | 7.0E-01             | 8.6E-01               | 9.6E-01             | 1.7E-03               | 5.4E-01             |
| GO:0042592 | GO:Bio L4  | homeostatic process                                      | 6.7E-01                    | 1.2E-01             | 3.7E-01               | 3.1E-01             | 9.4E-02               | 4.6E-03             | 5.0E-04               | 2.2E-01             | 2.4E-01               | 4.7E-03             | 1.8E-03               | 2.5E-01             |
| GO:0007566 | GO:Bio L4  | embryo implantation                                      | 1.6E-01                    | 2.3E-01             | 1.6E-03               | 3.8E-03             | 7.4E-01               | 5.8E-01             | 1.2E-01               | 3.7E-01             | 3.8E-01               | 4.0E-01             | 1.9E-03               | 1.1E-02             |
| GO:0001894 | GO:Bio L4  | tissue homeostasis                                       | 3.5E-01                    | 8.2E-02             | 2.0E-01               | 9.2E-02             | 2.3E-01               | 4.2E-01             | 1.0E-03               | 6.1E-01             | 2.8E-01               | 1.5E-01             | 1.9E-03               | 2.2E-01             |
| GO:0031498 | GO:Bio L4  | chromatin disassembly                                    | 5.0E-02                    | 5.3E-02             | 6.3E-02               | 1.1E-01             | 4.7E-01               | 4.8E-01             | 3.2E-03               | 4.3E-01             | 1.1E-01               | 1.2E-01             | 1.9E-03               | 1.9E-01             |
| GO:0001503 | GO:Bio L4  | ossification                                             | 2.2E-01                    | 8.4E-02             | 1.9E-01               | 1.6E-01             | 3.9E-01               | 3.3E-01             | 1.1E-03               | 3.9E-01             | 3.0E-01               | 1.3E-01             | 2.0E-03               | 2.3E-01             |

|            |            |                                                           |         |         |         |         |         |         |         |         |         |         |         |         |
|------------|------------|-----------------------------------------------------------|---------|---------|---------|---------|---------|---------|---------|---------|---------|---------|---------|---------|
| GO:0046983 | GO:Mole L4 | protein dimerization activity                             | 1.2E-01 | 1.9E-02 | 5.4E-02 | 9.5E-02 | 9.0E-01 | 1.0E-01 | 4.0E-03 | 3.2E-01 | 3.5E-01 | 1.4E-02 | 2.1E-03 | 1.4E-01 |
| GO:0060348 | GO:Bio L4  | bone development                                          | 2.5E-01 | 1.1E-01 | 2.4E-01 | 2.1E-01 | 4.3E-01 | 3.8E-01 | 1.0E-03 | 4.5E-01 | 3.5E-01 | 1.8E-01 | 2.2E-03 | 3.1E-01 |
| GO:0042481 | GO:Bio L4  | regulation of odontogenesis                               | 2.5E-01 | 4.7E-01 | 4.2E-01 | 5.3E-01 | 3.2E-01 | 3.5E-01 | 6.0E-04 | 8.6E-01 | 2.9E-01 | 4.6E-01 | 2.3E-03 | 8.1E-01 |
| GO:0030155 | GO:Bio L4  | regulation of cell adhesion                               | 3.4E-02 | 3.7E-02 | 9.3E-03 | 1.3E-02 | 9.8E-01 | 8.2E-01 | 2.9E-02 | 4.6E-01 | 1.5E-01 | 1.4E-01 | 2.5E-03 | 3.7E-02 |
| GO:0023046 | GO:Bio L2  | signaling process                                         | 3.0E-01 | 1.7E-02 | 1.8E-02 | 1.5E-02 | 1.6E-01 | 3.5E-02 | 1.5E-02 | 4.6E-01 | 1.9E-01 | 5.1E-03 | 2.5E-03 | 4.2E-02 |
| GO:0009653 | GO:Bio L4  | anatomical structure morphogenesis                        | 1.2E-01 | 1.0E-01 | 2.5E-03 | 1.7E-02 | 2.7E-01 | 1.5E-01 | 1.1E-01 | 7.1E-01 | 1.5E-01 | 7.8E-02 | 2.5E-03 | 6.6E-02 |
| GO:0023060 | GO:Bio L4  | signal transmission                                       | 3.0E-01 | 1.7E-02 | 1.8E-02 | 1.5E-02 | 1.7E-01 | 3.8E-02 | 1.5E-02 | 4.6E-01 | 2.0E-01 | 5.5E-03 | 2.5E-03 | 4.2E-02 |
| GO:0035019 | GO:Bio L4  | somatic stem cell maintenance                             | 4.0E-01 | 7.7E-01 | 7.4E-01 | 8.3E-01 | 1.2E-01 | 1.6E-01 | 4.0E-04 | 7.1E-01 | 2.0E-01 | 3.8E-01 | 2.7E-03 | 9.0E-01 |
| GO:0048871 | GO:Bio L4  | multicellular organismal homeostasis                      | 3.7E-01 | 8.2E-02 | 1.1E-01 | 7.8E-02 | 1.1E-01 | 2.6E-01 | 2.8E-03 | 7.1E-01 | 1.7E-01 | 1.0E-01 | 2.8E-03 | 2.2E-01 |
| GO:0030674 | GO:Mole L4 | protein binding, bridging                                 | 7.0E-01 | 7.3E-01 | 4.4E-02 | 1.3E-01 | 6.6E-01 | 7.5E-01 | 7.2E-03 | 9.7E-01 | 8.2E-01 | 8.8E-01 | 2.9E-03 | 3.8E-01 |
| GO:0009887 | GO:Bio L4  | organ morphogenesis                                       | 1.6E-01 | 9.2E-02 | 4.2E-02 | 6.6E-02 | 2.2E-01 | 3.2E-02 | 7.8E-03 | 8.4E-01 | 1.5E-01 | 2.0E-02 | 2.9E-03 | 2.2E-01 |
| GO:0023052 | GO:Bio L2  | signaling                                                 | 2.5E-01 | 1.2E-02 | 2.1E-02 | 1.5E-02 | 1.6E-01 | 3.8E-02 | 1.5E-02 | 4.7E-01 | 1.7E-01 | 3.8E-03 | 2.9E-03 | 4.1E-02 |
| GO:0015833 | GO:Bio L4  | peptide transport                                         | 6.4E-02 | 8.0E-02 | 2.1E-02 | 5.0E-02 | 4.7E-02 | 5.7E-01 | 1.6E-02 | 6.3E-01 | 2.0E-02 | 1.9E-01 | 3.0E-03 | 1.4E-01 |
| PA2027     | PharmGKB   | pgkb_pwy_Glucocorticoid_and_Inflammatory_genes_Pathway_PD | 2.4E-02 | 3.0E-02 | 7.0E-04 | 1.7E-03 | 1.6E-01 | 1.0E-01 | 5.0E-01 | 6.3E-01 | 2.5E-02 | 2.1E-02 | 3.1E-03 | 8.4E-03 |
| GO:0032501 | GO:Bio L2  | multicellular organismal process                          | 2.7E-01 | 2.8E-02 | 3.1E-02 | 3.4E-02 | 1.2E-01 | 9.3E-02 | 1.2E-02 | 4.1E-01 | 1.5E-01 | 1.8E-02 | 3.2E-03 | 7.3E-02 |
| GO:0008320 | GO:Mole L4 | protein transmembrane transporter activity                | 5.9E-01 | 5.3E-01 | 2.8E-02 | 1.6E-01 | 9.7E-02 | 1.2E-01 | 1.3E-02 | 9.2E-01 | 2.2E-01 | 2.4E-01 | 3.2E-03 | 4.3E-01 |
| GO:0016477 | GO:Bio L4  | cell migration                                            | 4.2E-03 | 3.3E-03 | 9.0E-04 | 2.0E-04 | 3.9E-01 | 2.2E-01 | 4.2E-01 | 2.1E-01 | 1.2E-02 | 6.0E-03 | 3.4E-03 | 4.7E-04 |
| GO:0048519 | GO:Bio L2  | negative regulation of biological process                 | 2.1E-01 | 2.1E-03 | 4.4E-02 | 3.7E-02 | 1.9E-01 | 4.7E-01 | 8.7E-03 | 7.0E-01 | 1.7E-01 | 7.8E-03 | 3.4E-03 | 1.2E-01 |
| GO:0048519 | GO:Bio L4  | negative regulation of biological process                 | 2.1E-01 | 2.1E-03 | 4.4E-02 | 3.7E-02 | 1.9E-01 | 4.7E-01 | 8.7E-03 | 7.0E-01 | 1.7E-01 | 7.8E-03 | 3.4E-03 | 1.2E-01 |
| GO:0046907 | GO:Bio L4  | intracellular transport                                   | 1.6E-01 | 2.7E-03 | 3.6E-02 | 2.1E-02 | 2.9E-01 | 4.4E-01 | 1.1E-02 | 3.9E-01 | 1.8E-01 | 9.1E-03 | 3.5E-03 | 4.7E-02 |
| GO:0044259 | GO:Bio L4  | multicellular organismal macromolecule metabolic process  | 2.9E-01 | 4.7E-02 | 7.5E-02 | 6.9E-02 | 9.7E-01 | 7.7E-01 | 5.3E-03 | 2.8E-02 | 6.4E-01 | 1.6E-01 | 3.5E-03 | 1.4E-02 |
| GO:0007165 | GO:Bio L4  | signal transduction                                       | 3.6E-01 | 3.3E-02 | 2.4E-02 | 2.7E-02 | 1.1E-01 | 3.8E-02 | 1.8E-02 | 6.1E-01 | 1.6E-01 | 9.5E-03 | 3.7E-03 | 8.4E-02 |
| GO:0046716 | GO:Bio L4  | muscle homeostasis                                        | 4.8E-01 | 7.9E-01 | 1.8E-01 | 8.1E-02 | 2.8E-01 | 3.5E-02 | 2.4E-03 | 4.6E-01 | 4.1E-01 | 1.3E-01 | 3.8E-03 | 1.6E-01 |
| GO:0030877 | GO:Cell L4 | beta-catenin destruction complex                          | 8.9E-01 | 7.0E-01 | 3.1E-01 | 3.6E-01 | 2.2E-01 | 6.0E-01 | 1.5E-03 | 1.4E-01 | 5.2E-01 | 7.8E-01 | 4.0E-03 | 2.0E-01 |

|            |            |                                                      |         |         |         |         |         |         |         |         |         |         |         |         |
|------------|------------|------------------------------------------------------|---------|---------|---------|---------|---------|---------|---------|---------|---------|---------|---------|---------|
| GO:0032502 | GO:Bio L2  | developmental process                                | 3.1E-01 | 8.0E-02 | 1.4E-02 | 1.6E-02 | 3.3E-01 | 5.9E-02 | 3.6E-02 | 4.1E-01 | 3.4E-01 | 3.0E-02 | 4.4E-03 | 3.8E-02 |
| GO:0060761 | GO:Bio L4  | negative regulation of response to cytokine stimulus | 2.5E-01 | 8.4E-02 | 1.0E-03 | 7.0E-04 | 9.0E-01 | 8.4E-01 | 5.5E-01 | 4.4E-01 | 5.6E-01 | 2.6E-01 | 4.7E-03 | 2.8E-03 |
| 4350       | KEGG       | TGF-beta signaling pathway                           | 2.3E-02 | 5.4E-03 | 4.2E-02 | 9.0E-02 | 4.7E-01 | 4.0E-01 | 1.3E-02 | 2.7E-01 | 6.1E-02 | 1.5E-02 | 4.7E-03 | 1.1E-01 |
| GO:0019827 | GO:Bio L4  | stem cell maintenance                                | 7.0E-01 | 7.7E-01 | 2.9E-01 | 4.3E-01 | 2.0E-01 | 2.7E-01 | 1.9E-03 | 7.8E-01 | 4.2E-01 | 5.3E-01 | 4.7E-03 | 7.0E-01 |
| GO:0048278 | GO:Bio L4  | vesicle docking                                      | 6.3E-02 | 1.1E-02 | 1.4E-03 | 4.8E-03 | 6.6E-01 | 7.8E-01 | 4.8E-01 | 1.3E-01 | 1.7E-01 | 4.9E-02 | 5.5E-03 | 5.4E-03 |
| GO:0051093 | GO:Bio L4  | negative regulation of developmental process         | 3.3E-02 | 7.0E-03 | 3.2E-02 | 2.1E-02 | 1.7E-01 | 3.7E-01 | 2.1E-02 | 8.8E-01 | 3.4E-02 | 1.8E-02 | 5.6E-03 | 9.2E-02 |
| GO:0010646 | GO:Bio L4  | regulation of cell communication                     | 1.5E-01 | 6.3E-03 | 3.9E-02 | 1.4E-02 | 4.3E-01 | 3.9E-01 | 1.7E-02 | 5.9E-01 | 2.4E-01 | 1.7E-02 | 5.6E-03 | 4.7E-02 |
| GO:0048523 | GO:Bio L4  | negative regulation of cellular process              | 2.1E-01 | 8.0E-03 | 5.1E-02 | 2.8E-02 | 1.4E-01 | 4.7E-01 | 1.4E-02 | 6.8E-01 | 1.4E-01 | 2.5E-02 | 5.8E-03 | 9.5E-02 |
| GO:0034747 | GO:Cell L4 | Axin-APC-beta-catenin-GSK3B complex                  | 7.9E-01 | 8.4E-01 | 5.8E-01 | 8.8E-01 | 1.1E-01 | 3.6E-01 | 1.2E-03 | 6.0E-01 | 3.0E-01 | 6.6E-01 | 5.8E-03 | 8.6E-01 |
| GO:0034329 | GO:Bio L4  | cell junction assembly                               | 7.0E-01 | 6.7E-01 | 3.0E-01 | 5.3E-01 | 1.7E-01 | 2.9E-02 | 2.4E-03 | 7.9E-01 | 3.7E-01 | 9.7E-02 | 5.9E-03 | 7.8E-01 |
| GO:0050794 | GO:Bio L4  | regulation of cellular process                       | 2.3E-01 | 6.4E-03 | 1.1E-01 | 7.7E-02 | 1.5E-01 | 1.7E-01 | 6.5E-03 | 7.8E-01 | 1.5E-01 | 8.4E-03 | 6.0E-03 | 2.3E-01 |
| GO:0045785 | GO:Bio L4  | positive regulation of cell adhesion                 | 2.4E-01 | 6.5E-02 | 1.4E-02 | 9.4E-03 | 9.7E-01 | 4.6E-01 | 5.2E-02 | 3.6E-01 | 5.7E-01 | 1.3E-01 | 6.0E-03 | 2.3E-02 |
| GO:0007166 | GO:Bio L4  | cell surface receptor linked signaling pathway       | 3.7E-01 | 1.1E-01 | 6.5E-02 | 1.7E-01 | 5.4E-02 | 7.4E-02 | 1.1E-02 | 8.1E-01 | 9.8E-02 | 4.8E-02 | 6.1E-03 | 4.1E-01 |
| GO:0044087 | GO:Bio L4  | regulation of cellular component biogenesis          | 1.5E-01 | 4.0E-02 | 6.2E-02 | 7.1E-02 | 1.7E-01 | 2.5E-02 | 1.2E-02 | 9.7E-01 | 1.2E-01 | 8.0E-03 | 6.3E-03 | 2.5E-01 |
| GO:0005742 | GO:Cell L4 | mitochondrial outer membrane translocase complex     | 6.3E-01 | 5.4E-01 | 2.3E-01 | 3.6E-01 | 2.3E-02 | 3.4E-02 | 3.3E-03 | 5.5E-01 | 7.6E-02 | 9.1E-02 | 6.3E-03 | 5.2E-01 |
| GO:0005578 | GO:Cell L4 | proteinaceous extracellular matrix                   | 8.4E-02 | 1.8E-02 | 1.5E-01 | 7.4E-02 | 1.3E-01 | 2.2E-01 | 5.1E-03 | 3.2E-01 | 6.1E-02 | 2.5E-02 | 6.3E-03 | 1.1E-01 |
| GO:0005102 | GO:Mole L4 | receptor binding                                     | 8.1E-02 | 1.5E-01 | 7.0E-03 | 5.8E-03 | 5.4E-02 | 2.8E-02 | 1.1E-01 | 8.0E-01 | 2.8E-02 | 2.7E-02 | 6.5E-03 | 3.0E-02 |
| GO:0050789 | GO:Bio L2  | regulation of biological process                     | 2.6E-01 | 6.1E-03 | 9.5E-02 | 6.6E-02 | 1.1E-01 | 1.1E-01 | 8.4E-03 | 7.8E-01 | 1.3E-01 | 5.5E-03 | 6.5E-03 | 2.0E-01 |
| GO:0030175 | GO:Cell L4 | filopodium                                           | 8.3E-01 | 9.6E-01 | 5.8E-01 | 5.7E-01 | 1.1E-01 | 1.7E-02 | 1.4E-03 | 5.8E-01 | 3.1E-01 | 8.4E-02 | 6.6E-03 | 6.9E-01 |
| GO:0051781 | GO:Bio L4  | positive regulation of cell division                 | 1.1E-01 | 1.8E-01 | 5.4E-02 | 6.2E-02 | 2.0E-01 | 6.7E-01 | 1.5E-02 | 3.5E-01 | 1.1E-01 | 3.8E-01 | 6.7E-03 | 1.0E-01 |
| GO:0040011 | GO:Bio L2  | locomotion                                           | 5.0E-03 | 1.3E-02 | 2.5E-03 | 3.0E-04 | 3.1E-01 | 6.3E-02 | 3.3E-01 | 3.4E-01 | 1.2E-02 | 6.4E-03 | 6.7E-03 | 1.0E-03 |
| 3440       | KEGG       | Homologous recombination                             | 2.4E-01 | 9.7E-02 | 7.6E-03 | 8.5E-03 | 1.0E-01 | 3.6E-01 | 1.1E-01 | 2.5E-01 | 1.2E-01 | 1.5E-01 | 6.8E-03 | 1.5E-02 |
| GO:0033193 | GO:Cell L4 | Lsd1/2 complex                                       | 1.4E-01 | 8.5E-02 | 6.2E-03 | 2.1E-02 | 6.5E-01 | 5.4E-01 | 1.4E-01 | 5.4E-01 | 3.1E-01 | 1.9E-01 | 6.8E-03 | 6.1E-02 |

|            |            |                                                                         |         |         |         |         |         |         |         |         |         |         |         |         |
|------------|------------|-------------------------------------------------------------------------|---------|---------|---------|---------|---------|---------|---------|---------|---------|---------|---------|---------|
| GO:0033205 | GO:Bio L4  | cytokinesis during cell cycle                                           | 2.1E-01 | 1.0E-01 | 4.3E-01 | 3.2E-01 | 4.6E-01 | 1.9E-01 | 2.1E-03 | 9.0E-01 | 3.2E-01 | 9.6E-02 | 7.2E-03 | 6.5E-01 |
| GO:0065007 | GO:Bio L2  | biological regulation                                                   | 3.0E-01 | 6.8E-03 | 1.3E-01 | 6.9E-02 | 1.4E-01 | 1.1E-01 | 6.9E-03 | 7.7E-01 | 1.8E-01 | 6.1E-03 | 7.3E-03 | 2.1E-01 |
| GO:0009880 | GO:Bio L4  | embryonic pattern specification                                         | 2.9E-01 | 3.7E-01 | 1.6E-03 | 1.9E-02 | 7.5E-01 | 9.3E-01 | 5.8E-01 | 6.3E-01 | 5.5E-01 | 7.1E-01 | 7.4E-03 | 6.6E-02 |
| GO:0045596 | GO:Bio L4  | negative regulation of cell differentiation                             | 1.9E-01 | 4.9E-02 | 4.3E-02 | 1.7E-02 | 7.7E-02 | 2.9E-01 | 2.3E-02 | 7.9E-01 | 7.5E-02 | 7.6E-02 | 7.8E-03 | 7.2E-02 |
| GO:0016645 | GO:Mole L4 | oxidoreductase activity, acting on the CH-NH group of donors            | 8.4E-01 | 1.4E-01 | 7.4E-03 | 2.1E-03 | 2.3E-01 | 6.8E-01 | 1.4E-01 | 9.4E-01 | 5.0E-01 | 3.1E-01 | 7.9E-03 | 1.4E-02 |
| GO:0050896 | GO:Bio L2  | response to stimulus                                                    | 4.6E-02 | 1.0E-02 | 7.8E-02 | 3.4E-02 | 2.7E-01 | 4.4E-02 | 1.3E-02 | 6.8E-01 | 6.7E-02 | 3.9E-03 | 8.0E-03 | 1.1E-01 |
| GO:0051649 | GO:Bio L4  | establishment of localization in cell                                   | 3.0E-01 | 2.5E-03 | 1.5E-01 | 1.0E-01 | 1.1E-01 | 2.3E-01 | 6.9E-03 | 6.2E-01 | 1.5E-01 | 4.8E-03 | 8.0E-03 | 2.4E-01 |
| GO:0048635 | GO:Bio L4  | negative regulation of muscle organ development                         | 3.0E-01 | 5.3E-01 | 1.1E-01 | 3.2E-01 | 8.0E-01 | 2.3E-01 | 9.3E-03 | 8.8E-01 | 5.8E-01 | 3.8E-01 | 8.3E-03 | 6.4E-01 |
| GO:0044243 | GO:Bio L4  | multicellular organismal catabolic process                              | 2.9E-01 | 7.5E-02 | 8.1E-02 | 6.8E-02 | 9.0E-01 | 5.1E-01 | 1.3E-02 | 1.1E-02 | 6.2E-01 | 1.6E-01 | 8.3E-03 | 6.4E-03 |
| GO:0016018 | GO:Mole L4 | cyclosporin A binding                                                   | 6.1E-01 | 5.2E-01 | 8.0E-02 | 1.1E-01 | 5.0E-01 | 7.4E-01 | 1.3E-02 | 3.5E-01 | 6.6E-01 | 7.5E-01 | 8.4E-03 | 1.6E-01 |
| GO:0042802 | GO:Mole L4 | identical protein binding                                               | 1.6E-01 | 3.8E-02 | 8.2E-02 | 1.8E-01 | 9.8E-01 | 1.0E-01 | 1.3E-02 | 5.9E-01 | 4.4E-01 | 2.5E-02 | 8.5E-03 | 3.5E-01 |
| GO:0048513 | GO:Bio L4  | organ development                                                       | 2.4E-01 | 7.2E-02 | 2.6E-02 | 1.7E-02 | 2.9E-01 | 9.0E-02 | 4.2E-02 | 6.4E-01 | 2.5E-01 | 3.9E-02 | 8.6E-03 | 6.0E-02 |
| GO:0044429 | GO:Cell L4 | mitochondrial part                                                      | 9.0E-01 | 6.4E-01 | 2.2E-01 | 1.5E-01 | 8.7E-01 | 8.4E-01 | 5.4E-03 | 1.6E-01 | 9.7E-01 | 8.7E-01 | 9.1E-03 | 1.1E-01 |
| GO:0051098 | GO:Bio L4  | regulation of binding                                                   | 1.4E-01 | 8.4E-02 | 9.4E-02 | 9.6E-03 | 8.3E-01 | 4.2E-01 | 1.3E-02 | 2.3E-01 | 3.7E-01 | 1.5E-01 | 9.1E-03 | 1.5E-02 |
| GO:0050902 | GO:Bio L4  | leukocyte adhesive activation                                           | 4.1E-03 | 7.5E-03 | 1.5E-03 | 1.3E-03 | 9.6E-01 | 9.9E-01 | 7.9E-01 | 2.0E-01 | 2.6E-02 | 4.4E-02 | 9.2E-03 | 2.4E-03 |
| GO:0006887 | GO:Bio L4  | exocytosis                                                              | 4.3E-01 | 1.1E-01 | 3.8E-02 | 6.7E-02 | 1.7E-01 | 1.5E-01 | 3.2E-02 | 2.1E-01 | 2.7E-01 | 8.5E-02 | 9.3E-03 | 7.5E-02 |
| 4310       | KEGG       | Wnt signaling pathway                                                   | 6.9E-01 | 3.2E-01 | 3.1E-01 | 3.7E-01 | 2.4E-01 | 6.9E-01 | 3.9E-03 | 4.4E-01 | 4.6E-01 | 5.5E-01 | 9.4E-03 | 4.6E-01 |
| GO:0006461 | GO:Bio L4  | protein complex assembly                                                | 1.2E-01 | 9.9E-02 | 2.2E-01 | 6.0E-02 | 2.1E-01 | 2.4E-02 | 5.8E-03 | 7.7E-01 | 1.2E-01 | 1.7E-02 | 9.8E-03 | 1.9E-01 |
| GO:0051209 | GO:Bio L4  | release of sequestered calcium ion into cytosol                         | 2.6E-01 | 1.5E-01 | 1.3E-01 | 1.8E-01 | 1.0E-03 | 3.4E-03 | 1.0E-02 | 2.5E-01 | 2.4E-03 | 4.4E-03 | 1.0E-02 | 1.8E-01 |
| GO:0051282 | GO:Bio L4  | regulation of sequestering of calcium ion                               | 2.6E-01 | 1.5E-01 | 1.3E-01 | 1.8E-01 | 1.0E-03 | 3.4E-03 | 1.0E-02 | 2.5E-01 | 2.4E-03 | 4.4E-03 | 1.0E-02 | 1.8E-01 |
| GO:0051283 | GO:Bio L4  | negative regulation of sequestering of calcium ion                      | 2.6E-01 | 1.5E-01 | 1.3E-01 | 1.8E-01 | 1.0E-03 | 3.4E-03 | 1.0E-02 | 2.5E-01 | 2.4E-03 | 4.4E-03 | 1.0E-02 | 1.8E-01 |
| GO:0090190 | GO:Bio L4  | positive regulation of branching involved in ureteric bud morphogenesis | 6.9E-01 | 9.3E-01 | 4.4E-01 | 3.9E-01 | 1.6E-02 | 3.1E-02 | 3.0E-03 | 9.8E-02 | 5.9E-02 | 1.3E-01 | 1.0E-02 | 1.6E-01 |

|            |            |                                                                       |         |         |         |         |         |         |         |         |         |         |         |         |
|------------|------------|-----------------------------------------------------------------------|---------|---------|---------|---------|---------|---------|---------|---------|---------|---------|---------|---------|
| GO:0051235 | GO:Bio L4  | maintenance of location                                               | 2.2E-01 | 1.3E-01 | 2.8E-01 | 3.2E-01 | 2.5E-02 | 2.8E-02 | 4.7E-03 | 4.3E-01 | 3.4E-02 | 2.4E-02 | 1.0E-02 | 4.1E-01 |
| GO:0051919 | GO:Bio L4  | positive regulation of fibrinolysis                                   | 2.7E-01 | 5.6E-01 | 2.7E-01 | 2.8E-01 | 3.4E-01 | 4.0E-01 | 4.9E-03 | 5.6E-01 | 3.1E-01 | 5.6E-01 | 1.0E-02 | 4.5E-01 |
| GO:0003006 | GO:Bio L4  | reproductive developmental process                                    | 4.2E-01 | 4.2E-01 | 1.7E-02 | 2.8E-02 | 7.2E-01 | 5.7E-01 | 8.1E-02 | 2.3E-01 | 6.6E-01 | 5.8E-01 | 1.0E-02 | 3.9E-02 |
| GO:0044421 | GO:Cell L2 | extracellular region part                                             | 6.8E-02 | 5.0E-02 | 9.6E-02 | 4.0E-02 | 4.4E-01 | 2.2E-01 | 1.5E-02 | 5.0E-01 | 1.4E-01 | 6.1E-02 | 1.1E-02 | 9.7E-02 |
| GO:0045275 | GO:Cell L4 | respiratory chain complex III                                         | 1.9E-01 | 3.8E-02 | 1.6E-02 | 4.9E-02 | 4.6E-01 | 5.1E-01 | 8.7E-02 | 5.2E-03 | 3.0E-01 | 9.5E-02 | 1.1E-02 | 2.4E-03 |
| GO:0009966 | GO:Bio L4  | regulation of signal transduction                                     | 2.0E-01 | 4.1E-02 | 2.3E-02 | 4.3E-03 | 6.0E-01 | 6.0E-01 | 6.5E-02 | 5.2E-01 | 3.7E-01 | 1.2E-01 | 1.1E-02 | 1.6E-02 |
| GO:0023051 | GO:Bio L4  | regulation of signaling process                                       | 2.0E-01 | 4.1E-02 | 2.3E-02 | 4.3E-03 | 6.0E-01 | 6.0E-01 | 6.5E-02 | 5.2E-01 | 3.7E-01 | 1.2E-01 | 1.1E-02 | 1.6E-02 |
| GO:0000164 | GO:Cell L4 | protein phosphatase type 1 complex                                    | 6.8E-01 | 3.6E-01 | 4.9E-01 | 2.8E-01 | 1.7E-01 | 1.2E-01 | 3.0E-03 | 2.1E-01 | 3.6E-01 | 1.7E-01 | 1.1E-02 | 2.2E-01 |
| GO:0019725 | GO:Bio L4  | cellular homeostasis                                                  | 7.8E-01 | 2.2E-01 | 5.3E-01 | 5.3E-01 | 6.3E-02 | 1.0E-02 | 2.9E-03 | 2.2E-01 | 2.0E-01 | 1.6E-02 | 1.2E-02 | 3.7E-01 |
| GO:0005488 | GO:Mole L2 | binding                                                               | 2.8E-01 | 6.9E-03 | 7.9E-02 | 2.2E-02 | 1.7E-01 | 2.8E-02 | 2.0E-02 | 4.5E-01 | 2.0E-01 | 1.9E-03 | 1.2E-02 | 5.5E-02 |
| GO:0045926 | GO:Bio L4  | negative regulation of growth                                         | 5.4E-01 | 2.7E-01 | 1.2E-01 | 3.7E-01 | 4.4E-01 | 3.6E-01 | 1.4E-02 | 5.9E-01 | 5.8E-01 | 3.3E-01 | 1.2E-02 | 5.5E-01 |
| GO:0048731 | GO:Bio L4  | system development                                                    | 2.9E-01 | 6.4E-02 | 3.2E-02 | 2.2E-02 | 2.0E-01 | 5.4E-02 | 5.0E-02 | 2.2E-01 | 2.3E-01 | 2.3E-02 | 1.2E-02 | 3.1E-02 |
| GO:0009987 | GO:Bio L2  | cellular process                                                      | 4.4E-01 | 1.5E-02 | 9.3E-02 | 3.6E-02 | 2.8E-01 | 9.7E-02 | 1.7E-02 | 4.8E-01 | 3.8E-01 | 1.1E-02 | 1.2E-02 | 8.7E-02 |
| GO:0005662 | GO:Cell L4 | DNA replication factor A complex                                      | 4.4E-01 | 2.2E-01 | 9.0E-02 | 9.5E-02 | 2.7E-01 | 1.4E-01 | 1.8E-02 | 8.7E-01 | 3.8E-01 | 1.4E-01 | 1.2E-02 | 2.9E-01 |
| GO:0051983 | GO:Bio L4  | regulation of chromosome segregation                                  | 6.9E-01 | 8.1E-01 | 5.9E-01 | 7.1E-01 | 8.3E-01 | 9.8E-01 | 2.8E-03 | 9.2E-01 | 8.9E-01 | 9.8E-01 | 1.2E-02 | 9.3E-01 |
| GO:0048468 | GO:Bio L4  | cell development                                                      | 1.6E-01 | 7.0E-02 | 9.4E-02 | 5.9E-02 | 3.2E-01 | 2.7E-01 | 1.8E-02 | 7.9E-01 | 2.0E-01 | 9.4E-02 | 1.2E-02 | 1.9E-01 |
| GO:0022603 | GO:Bio L4  | regulation of anatomical structure morphogenesis                      | 1.2E-01 | 1.8E-01 | 2.5E-01 | 1.7E-01 | 6.1E-01 | 6.6E-01 | 6.9E-03 | 6.6E-01 | 2.6E-01 | 3.8E-01 | 1.3E-02 | 3.6E-01 |
| GO:0007267 | GO:Bio L4  | cell-cell signaling                                                   | 9.9E-02 | 5.8E-03 | 2.8E-02 | 1.5E-02 | 2.3E-01 | 2.2E-01 | 6.2E-02 | 2.2E-01 | 1.1E-01 | 9.7E-03 | 1.3E-02 | 2.2E-02 |
| GO:0010770 | GO:Bio L4  | positive regulation of cell morphogenesis involved in differentiation | 5.1E-02 | 1.4E-01 | 2.6E-01 | 2.4E-01 | 9.2E-01 | 1.0E+00 | 7.1E-03 | 5.1E-01 | 1.9E-01 | 4.0E-01 | 1.3E-02 | 3.8E-01 |
| GO:0051705 | GO:Bio L4  | behavioral interaction between organisms                              | 5.7E-01 | 2.2E-01 | 3.2E-03 | 4.7E-03 | 7.2E-01 | 9.3E-01 | 5.9E-01 | 4.4E-01 | 7.8E-01 | 5.3E-01 | 1.4E-02 | 1.5E-02 |
| GO:0048870 | GO:Bio L4  | cell motility                                                         | 7.7E-03 | 6.3E-03 | 4.0E-03 | 1.0E-03 | 4.0E-01 | 2.7E-01 | 4.8E-01 | 2.6E-01 | 2.1E-02 | 1.3E-02 | 1.4E-02 | 2.4E-03 |
| GO:0070997 | GO:Bio L4  | neuron death                                                          | 4.8E-03 | 1.3E-02 | 3.9E-03 | 6.7E-03 | 2.8E-01 | 4.2E-01 | 4.9E-01 | 9.2E-01 | 1.0E-02 | 3.4E-02 | 1.4E-02 | 3.7E-02 |
| GO:0031268 | GO:Bio L4  | pseudopodium organization                                             | 9.7E-01 | 8.4E-01 | 7.4E-01 | 7.7E-01 | 3.7E-01 | 5.5E-01 | 2.6E-03 | 8.7E-01 | 7.2E-01 | 8.2E-01 | 1.4E-02 | 9.4E-01 |

|            |            |                                                        |         |         |         |         |         |         |         |         |         |         |         |         |
|------------|------------|--------------------------------------------------------|---------|---------|---------|---------|---------|---------|---------|---------|---------|---------|---------|---------|
| GO:0010605 | GO:Bio L4  | negative regulation of macromolecule metabolic process | 5.8E-01 | 2.3E-01 | 2.5E-01 | 1.4E-01 | 3.9E-01 | 7.1E-01 | 7.8E-03 | 8.2E-01 | 5.6E-01 | 4.6E-01 | 1.4E-02 | 3.6E-01 |
| GO:0060896 | GO:Bio L4  | neural plate pattern specification                     | 4.1E-01 | 5.6E-01 | 6.8E-03 | 7.4E-03 | 2.9E-01 | 6.2E-01 | 2.9E-01 | 7.8E-01 | 3.8E-01 | 7.1E-01 | 1.4E-02 | 3.6E-02 |
| GO:0031012 | GO:Cell L4 | extracellular matrix                                   | 1.2E-01 | 3.1E-02 | 2.0E-01 | 9.3E-02 | 1.0E-01 | 2.6E-01 | 1.0E-02 | 3.0E-01 | 6.7E-02 | 4.8E-02 | 1.4E-02 | 1.3E-01 |
| GO:0032271 | GO:Bio L4  | regulation of protein polymerization                   | 1.4E-01 | 4.3E-02 | 5.4E-02 | 4.8E-02 | 2.0E-01 | 4.5E-02 | 3.7E-02 | 9.2E-01 | 1.3E-01 | 1.4E-02 | 1.4E-02 | 1.8E-01 |
| GO:0009399 | GO:Bio L4  | nitrogen fixation                                      | 1.8E-01 | 3.3E-01 | 2.6E-03 | 2.9E-03 | 7.1E-01 | 3.3E-01 | 7.8E-01 | 2.1E-01 | 3.9E-01 | 3.5E-01 | 1.5E-02 | 5.2E-03 |
| GO:0001525 | GO:Bio L4  | angiogenesis                                           | 1.0E-01 | 9.3E-02 | 6.2E-03 | 5.2E-03 | 5.5E-01 | 1.9E-01 | 3.3E-01 | 5.4E-01 | 2.2E-01 | 9.0E-02 | 1.5E-02 | 1.9E-02 |
| GO:0043022 | GO:Mole L4 | ribosome binding                                       | 2.5E-01 | 2.2E-01 | 2.4E-03 | 2.9E-03 | 1.7E-01 | 5.0E-01 | 8.9E-01 | 3.5E-01 | 1.7E-01 | 3.5E-01 | 1.5E-02 | 8.0E-03 |
| GO:0035239 | GO:Bio L4  | tube morphogenesis                                     | 4.4E-01 | 5.1E-01 | 1.4E-01 | 8.7E-02 | 8.8E-02 | 1.5E-03 | 1.6E-02 | 2.7E-01 | 1.6E-01 | 6.2E-03 | 1.5E-02 | 1.1E-01 |
| GO:0044420 | GO:Cell L4 | extracellular matrix part                              | 1.6E-01 | 7.1E-02 | 4.1E-01 | 1.5E-01 | 8.3E-01 | 4.5E-01 | 5.5E-03 | 4.5E-01 | 3.9E-01 | 1.4E-01 | 1.6E-02 | 2.5E-01 |
| GO:0019222 | GO:Bio L4  | regulation of metabolic process                        | 1.0E-01 | 4.4E-03 | 9.4E-02 | 4.8E-02 | 8.1E-02 | 3.4E-01 | 2.4E-02 | 7.0E-01 | 4.7E-02 | 1.1E-02 | 1.6E-02 | 1.5E-01 |
| GO:0030234 | GO:Mole L2 | enzyme regulator activity                              | 3.7E-01 | 2.3E-02 | 2.0E-01 | 3.0E-02 | 3.9E-01 | 1.9E-01 | 1.1E-02 | 6.6E-01 | 4.3E-01 | 2.8E-02 | 1.6E-02 | 9.6E-02 |
| GO:0051313 | GO:Bio L4  | attachment of spindle microtubules to chromosome       | 1.0E-01 | 3.3E-01 | 9.2E-01 | 8.7E-01 | 3.2E-01 | 1.1E-01 | 2.5E-03 | 9.1E-01 | 1.5E-01 | 1.5E-01 | 1.6E-02 | 9.8E-01 |
| GO:0012501 | GO:Bio L4  | programmed cell death                                  | 2.5E-02 | 4.0E-04 | 1.8E-02 | 1.6E-03 | 2.5E-01 | 3.0E-01 | 1.3E-01 | 2.7E-01 | 3.8E-02 | 1.2E-03 | 1.7E-02 | 3.8E-03 |
| GO:0050661 | GO:Mole L4 | NADP or NADPH binding                                  | 1.6E-01 | 4.0E-02 | 2.5E-02 | 1.1E-02 | 9.1E-01 | 4.1E-01 | 9.6E-02 | 4.9E-02 | 4.3E-01 | 8.5E-02 | 1.7E-02 | 4.4E-03 |
| GO:0042043 | GO:Mole L4 | neurexin binding                                       | 6.9E-02 | 3.3E-02 | 3.1E-01 | 3.6E-01 | 1.3E-01 | 1.8E-01 | 7.8E-03 | 7.3E-01 | 5.0E-02 | 3.6E-02 | 1.7E-02 | 6.1E-01 |
| GO:0051094 | GO:Bio L4  | positive regulation of developmental process           | 3.6E-01 | 3.1E-01 | 4.6E-01 | 4.9E-01 | 5.1E-01 | 3.8E-01 | 5.4E-03 | 9.3E-01 | 4.9E-01 | 3.7E-01 | 1.7E-02 | 8.1E-01 |
| GO:0008104 | GO:Bio L4  | protein localization                                   | 6.0E-01 | 1.1E-01 | 9.2E-02 | 2.1E-02 | 6.1E-02 | 1.3E-01 | 2.8E-02 | 7.3E-01 | 1.6E-01 | 7.7E-02 | 1.8E-02 | 7.9E-02 |
| GO:0051239 | GO:Bio L4  | regulation of multicellular organismal process         | 1.2E-01 | 1.4E-02 | 1.4E-01 | 1.5E-01 | 1.2E-01 | 4.4E-01 | 1.8E-02 | 7.6E-01 | 7.9E-02 | 3.7E-02 | 1.8E-02 | 3.6E-01 |
| GO:0000710 | GO:Bio L4  | meiotic mismatch repair                                | 2.0E-04 | 5.0E-05 | 1.3E-02 | 2.9E-02 | 2.9E-01 | 4.1E-01 | 2.0E-01 | 7.7E-01 | 6.3E-04 | 2.4E-04 | 1.8E-02 | 1.1E-01 |
| GO:0032272 | GO:Bio L4  | negative regulation of protein polymerization          | 4.4E-02 | 3.6E-02 | 2.1E-02 | 1.7E-02 | 4.8E-02 | 1.4E-02 | 1.2E-01 | 7.9E-01 | 1.5E-02 | 4.4E-03 | 1.8E-02 | 7.2E-02 |
| GO:0016265 | GO:Bio L2  | death                                                  | 3.1E-02 | 5.0E-05 | 1.9E-02 | 2.2E-03 | 1.9E-01 | 2.9E-01 | 1.4E-01 | 2.9E-01 | 3.6E-02 | 1.7E-04 | 1.8E-02 | 5.4E-03 |
| GO:0060022 | GO:Bio L4  | hard palate development                                | 2.8E-02 | 3.6E-02 | 1.5E-02 | 1.9E-02 | 8.4E-01 | 8.7E-01 | 1.8E-01 | 4.6E-01 | 1.1E-01 | 1.4E-01 | 1.9E-02 | 5.0E-02 |
| GO:0030154 | GO:Bio L4  | cell differentiation                                   | 3.8E-01 | 1.3E-01 | 7.5E-02 | 4.3E-02 | 4.1E-01 | 2.7E-01 | 3.6E-02 | 9.3E-01 | 4.5E-01 | 1.6E-01 | 1.9E-02 | 1.7E-01 |
| GO:0032231 | GO:Bio L4  | regulation of actin filament bundle assembly           | 1.6E-01 | 5.7E-02 | 2.9E-01 | 2.6E-01 | 2.8E-02 | 7.5E-03 | 9.5E-03 | 8.3E-01 | 2.9E-02 | 3.7E-03 | 1.9E-02 | 5.5E-01 |

|            |            |                                                                           |         |         |         |         |         |         |         |         |         |         |         |         |
|------------|------------|---------------------------------------------------------------------------|---------|---------|---------|---------|---------|---------|---------|---------|---------|---------|---------|---------|
| GO:0043254 | GO:Bio L4  | regulation of protein complex assembly                                    | 1.7E-01 | 6.5E-02 | 5.7E-02 | 3.9E-02 | 2.2E-01 | 3.6E-02 | 4.8E-02 | 9.5E-01 | 1.6E-01 | 1.6E-02 | 1.9E-02 | 1.6E-01 |
| GO:0042700 | GO:Bio L4  | lutinizing hormone signaling pathway                                      | 2.2E-01 | 5.3E-01 | 1.3E-01 | 1.1E-01 | 1.3E-01 | 1.2E-01 | 2.0E-02 | 9.7E-02 | 1.3E-01 | 2.4E-01 | 1.9E-02 | 6.0E-02 |
| GO:0045123 | GO:Bio L4  | cellular extravasation                                                    | 5.5E-02 | 4.1E-02 | 2.9E-03 | 2.3E-03 | 9.6E-01 | 9.7E-01 | 9.5E-01 | 1.6E-01 | 2.1E-01 | 1.7E-01 | 1.9E-02 | 3.3E-03 |
| GO:0010639 | GO:Bio L4  | negative regulation of organelle organization                             | 2.4E-01 | 1.3E-01 | 2.5E-01 | 2.1E-01 | 1.4E-02 | 2.7E-03 | 1.1E-02 | 9.7E-01 | 2.3E-02 | 3.2E-03 | 1.9E-02 | 5.3E-01 |
| GO:0050673 | GO:Bio L4  | epithelial cell proliferation                                             | 3.0E-01 | 1.0E-01 | 7.6E-01 | 8.2E-01 | 3.8E-02 | 5.7E-02 | 3.7E-03 | 3.2E-01 | 6.2E-02 | 3.6E-02 | 1.9E-02 | 6.2E-01 |
| GO:0080090 | GO:Bio L4  | regulation of primary metabolic process                                   | 6.2E-02 | 2.1E-03 | 1.3E-01 | 7.2E-02 | 7.6E-02 | 4.5E-01 | 2.3E-02 | 7.7E-01 | 3.0E-02 | 7.5E-03 | 2.0E-02 | 2.1E-01 |
| GO:0044463 | GO:Cell L4 | cell projection part                                                      | 1.0E-01 | 2.9E-03 | 4.8E-02 | 9.1E-03 | 2.6E-01 | 1.0E-01 | 6.2E-02 | 4.1E-01 | 1.2E-01 | 2.7E-03 | 2.0E-02 | 2.5E-02 |
| GO:0017077 | GO:Mole L4 | oxidative phosphorylation uncoupler activity                              | 2.7E-01 | 5.7E-01 | 1.5E-02 | 4.7E-03 | 6.4E-01 | 5.3E-01 | 2.0E-01 | 9.4E-01 | 4.8E-01 | 6.7E-01 | 2.0E-02 | 2.8E-02 |
| GO:0000502 | GO:Cell L4 | proteasome complex                                                        | 7.4E-01 | 6.6E-01 | 5.1E-02 | 5.7E-02 | 7.8E-01 | 5.7E-01 | 5.9E-02 | 9.1E-01 | 9.0E-01 | 7.4E-01 | 2.0E-02 | 2.0E-01 |
| GO:0051238 | GO:Bio L4  | sequestering of metal ion                                                 | 2.3E-01 | 1.2E-01 | 2.3E-01 | 3.0E-01 | 1.2E-03 | 6.7E-03 | 1.3E-02 | 3.5E-01 | 2.5E-03 | 6.3E-03 | 2.1E-02 | 3.4E-01 |
| GO:0010717 | GO:Bio L4  | regulation of epithelial to mesenchymal transition                        | 7.2E-02 | 1.8E-01 | 3.3E-01 | 3.1E-01 | 9.0E-01 | 1.0E+00 | 9.2E-03 | 5.9E-01 | 2.4E-01 | 4.9E-01 | 2.1E-02 | 4.9E-01 |
| GO:0022414 | GO:Bio L2  | reproductive process                                                      | 7.7E-01 | 6.1E-01 | 2.3E-02 | 7.6E-02 | 5.9E-01 | 2.0E-01 | 1.3E-01 | 3.4E-01 | 8.2E-01 | 3.9E-01 | 2.1E-02 | 1.2E-01 |
| GO:0043902 | GO:Bio L4  | positive regulation of multi-organism process                             | 8.4E-03 | 1.6E-02 | 5.7E-02 | 5.0E-02 | 1.7E-01 | 1.3E-01 | 5.4E-02 | 1.2E-01 | 1.1E-02 | 1.5E-02 | 2.1E-02 | 3.7E-02 |
| GO:0051712 | GO:Bio L4  | positive regulation of killing of cells of another organism               | 8.4E-03 | 1.6E-02 | 5.7E-02 | 5.0E-02 | 1.7E-01 | 1.3E-01 | 5.4E-02 | 1.2E-01 | 1.1E-02 | 1.5E-02 | 2.1E-02 | 3.7E-02 |
| GO:0044246 | GO:Bio L4  | regulation of multicellular organismal metabolic process                  | 3.0E-01 | 5.7E-02 | 6.0E-02 | 1.2E-01 | 2.6E-01 | 8.2E-01 | 5.2E-02 | 3.5E-01 | 2.8E-01 | 1.9E-01 | 2.1E-02 | 1.8E-01 |
| GO:0014870 | GO:Bio L4  | response to muscle inactivity                                             | 2.9E-01 | 1.7E-01 | 1.1E-02 | 3.6E-03 | 1.6E-01 | 6.6E-01 | 2.9E-01 | 3.6E-01 | 1.9E-01 | 3.6E-01 | 2.1E-02 | 1.0E-02 |
| GO:0014877 | GO:Bio L4  | response to muscle inactivity involved in regulation of muscle adaptation | 2.9E-01 | 1.7E-01 | 1.1E-02 | 3.6E-03 | 1.6E-01 | 6.6E-01 | 2.9E-01 | 3.6E-01 | 1.9E-01 | 3.6E-01 | 2.1E-02 | 1.0E-02 |
| 5210       | KEGG       | Colorectal cancer                                                         | 3.8E-02 | 4.7E-02 | 2.4E-01 | 5.3E-01 | 9.3E-01 | 8.0E-01 | 1.3E-02 | 2.8E-01 | 1.5E-01 | 1.6E-01 | 2.1E-02 | 4.4E-01 |
| GO:0030397 | GO:Bio L4  | membrane disassembly                                                      | 1.4E-01 | 9.4E-02 | 4.5E-02 | 4.1E-02 | 6.0E-01 | 8.7E-01 | 7.2E-02 | 5.9E-01 | 2.9E-01 | 2.9E-01 | 2.2E-02 | 1.1E-01 |
| GO:0051302 | GO:Bio L4  | regulation of cell division                                               | 1.8E-01 | 2.6E-01 | 9.9E-02 | 1.1E-01 | 3.0E-01 | 8.0E-01 | 3.2E-02 | 4.2E-01 | 2.1E-01 | 5.3E-01 | 2.2E-02 | 1.9E-01 |

|            |            |                                                           |         |         |         |         |         |         |         |         |         |         |         |         |
|------------|------------|-----------------------------------------------------------|---------|---------|---------|---------|---------|---------|---------|---------|---------|---------|---------|---------|
| GO:0051171 | GO:Bio L4  | regulation of nitrogen compound metabolic process         | 3.1E-02 | 1.7E-03 | 9.5E-02 | 4.2E-02 | 1.0E-01 | 6.5E-01 | 3.4E-02 | 8.5E-01 | 2.1E-02 | 8.7E-03 | 2.2E-02 | 1.6E-01 |
| 532        | KEGG       | Glycosaminoglycan biosynthesis - chondroitin sulfate      | 3.1E-01 | 1.8E-01 | 3.4E-03 | 4.7E-02 | 9.9E-01 | 9.9E-01 | 9.5E-01 | 4.5E-01 | 6.7E-01 | 4.9E-01 | 2.2E-02 | 1.0E-01 |
| GO:0031323 | GO:Bio L4  | regulation of cellular metabolic process                  | 9.6E-02 | 5.0E-03 | 1.4E-01 | 8.4E-02 | 9.5E-02 | 4.1E-01 | 2.2E-02 | 7.3E-01 | 5.2E-02 | 1.5E-02 | 2.2E-02 | 2.3E-01 |
| GO:0042393 | GO:Mole L4 | histone binding                                           | 9.0E-01 | 9.6E-01 | 1.8E-01 | 2.4E-01 | 1.8E-01 | 5.4E-01 | 1.8E-02 | 4.9E-02 | 4.6E-01 | 8.6E-01 | 2.2E-02 | 6.3E-02 |
| GO:0051640 | GO:Bio L4  | organelle localization                                    | 1.6E-01 | 4.4E-02 | 6.7E-01 | 5.7E-01 | 6.6E-01 | 3.0E-01 | 4.9E-03 | 3.5E-01 | 3.5E-01 | 6.9E-02 | 2.2E-02 | 5.3E-01 |
| GO:0000003 | GO:Bio L2  | reproduction                                              | 7.8E-01 | 6.2E-01 | 2.4E-02 | 8.0E-02 | 6.0E-01 | 2.1E-01 | 1.3E-01 | 3.4E-01 | 8.2E-01 | 4.0E-01 | 2.2E-02 | 1.3E-01 |
| GO:0031324 | GO:Bio L4  | negative regulation of cellular metabolic process         | 6.1E-01 | 1.6E-01 | 2.8E-01 | 1.6E-01 | 2.2E-01 | 6.8E-01 | 1.2E-02 | 7.5E-01 | 4.1E-01 | 3.5E-01 | 2.2E-02 | 3.7E-01 |
| GO:0051179 | GO:Bio L2  | localization                                              | 3.1E-01 | 8.6E-03 | 1.8E-01 | 4.3E-02 | 1.2E-01 | 3.6E-02 | 1.9E-02 | 4.4E-01 | 1.6E-01 | 2.8E-03 | 2.2E-02 | 9.5E-02 |
| GO:0031333 | GO:Bio L4  | negative regulation of protein complex assembly           | 3.9E-02 | 2.0E-02 | 2.6E-02 | 1.5E-02 | 4.6E-02 | 1.7E-02 | 1.3E-01 | 8.5E-01 | 1.3E-02 | 3.1E-03 | 2.2E-02 | 6.8E-02 |
| 760        | KEGG       | Nicotinate and nicotinamide metabolism                    | 2.5E-02 | 6.7E-03 | 7.9E-03 | 2.6E-03 | 7.5E-01 | 5.1E-01 | 4.3E-01 | 9.8E-01 | 9.2E-02 | 2.3E-02 | 2.3E-02 | 1.8E-02 |
| GO:0051894 | GO:Bio L4  | positive regulation of focal adhesion assembly            | 2.1E-02 | 2.1E-02 | 3.4E-01 | 1.5E-01 | 1.3E-01 | 2.5E-02 | 1.0E-02 | 7.9E-01 | 1.9E-02 | 4.6E-03 | 2.3E-02 | 3.7E-01 |
| GO:0008233 | GO:Mole L4 | peptidase activity                                        | 7.8E-01 | 8.3E-01 | 3.9E-01 | 3.0E-01 | 1.9E-01 | 3.2E-02 | 8.6E-03 | 4.5E-01 | 4.3E-01 | 1.2E-01 | 2.3E-02 | 4.1E-01 |
| GO:0019887 | GO:Mole L4 | protein kinase regulator activity                         | 6.8E-01 | 4.7E-01 | 3.9E-01 | 4.6E-01 | 1.1E-01 | 5.9E-02 | 8.8E-03 | 7.3E-01 | 2.7E-01 | 1.3E-01 | 2.3E-02 | 7.0E-01 |
| GO:0001824 | GO:Bio L4  | blastocyst development                                    | 4.7E-01 | 3.9E-01 | 1.5E-02 | 4.4E-02 | 1.1E-01 | 8.1E-02 | 2.3E-01 | 6.6E-01 | 2.0E-01 | 1.4E-01 | 2.3E-02 | 1.3E-01 |
| GO:0022610 | GO:Bio L2  | biological adhesion                                       | 6.2E-01 | 3.1E-01 | 1.9E-01 | 1.5E-01 | 5.7E-01 | 4.9E-01 | 1.9E-02 | 3.5E-03 | 7.2E-01 | 4.3E-01 | 2.3E-02 | 4.5E-03 |
| GO:0016667 | GO:Mole L4 | oxidoreductase activity, acting on sulfur group of donors | 9.4E-01 | 7.3E-01 | 5.9E-01 | 8.5E-01 | 5.2E-01 | 1.1E-01 | 5.9E-03 | 2.6E-01 | 8.4E-01 | 2.8E-01 | 2.3E-02 | 5.6E-01 |
| GO:0048729 | GO:Bio L4  | tissue morphogenesis                                      | 1.2E-01 | 8.9E-02 | 1.4E-01 | 1.3E-01 | 2.7E-01 | 9.1E-03 | 2.5E-02 | 9.5E-01 | 1.4E-01 | 6.6E-03 | 2.3E-02 | 3.8E-01 |
| GO:0032605 | GO:Bio L4  | hepatocyte growth factor production                       | 5.7E-01 | 7.9E-01 | 4.1E-01 | 5.1E-01 | 1.7E-01 | 4.9E-02 | 8.7E-03 | 2.3E-01 | 3.2E-01 | 1.7E-01 | 2.4E-02 | 3.7E-01 |
| GO:0046789 | GO:Mole L4 | host cell surface receptor binding                        | 5.7E-01 | 7.9E-01 | 4.1E-01 | 5.1E-01 | 1.7E-01 | 4.9E-02 | 8.7E-03 | 2.3E-01 | 3.2E-01 | 1.7E-01 | 2.4E-02 | 3.7E-01 |
| GO:0019955 | GO:Mole L4 | cytokine binding                                          | 1.6E-01 | 3.0E-02 | 2.3E-02 | 4.9E-02 | 3.8E-01 | 6.6E-01 | 1.6E-01 | 9.2E-01 | 2.3E-01 | 9.6E-02 | 2.4E-02 | 1.8E-01 |
| GO:0030856 | GO:Bio L4  | regulation of epithelial cell differentiation             | 3.2E-01 | 4.1E-01 | 1.9E-01 | 1.7E-01 | 5.5E-01 | 8.9E-01 | 1.9E-02 | 9.9E-01 | 4.9E-01 | 7.3E-01 | 2.4E-02 | 4.6E-01 |
| GO:0032940 | GO:Bio L4  | secretion by cell                                         | 3.7E-01 | 2.1E-02 | 9.1E-02 | 1.2E-01 | 5.0E-02 | 3.1E-01 | 4.0E-02 | 7.9E-01 | 9.3E-02 | 3.9E-02 | 2.4E-02 | 3.2E-01 |
| GO:0046903 | GO:Bio L4  | secretion                                                 | 1.4E-01 | 7.6E-03 | 8.4E-02 | 1.0E-01 | 9.1E-02 | 5.3E-01 | 4.3E-02 | 8.1E-01 | 7.0E-02 | 2.6E-02 | 2.4E-02 | 2.8E-01 |



|            |            |                                                                          |         |         |         |         |         |         |         |         |         |         |         |         |
|------------|------------|--------------------------------------------------------------------------|---------|---------|---------|---------|---------|---------|---------|---------|---------|---------|---------|---------|
| GO:0009892 | GO:Bio L4  | negative regulation of metabolic process                                 | 5.8E-01 | 8.0E-02 | 2.8E-01 | 1.6E-01 | 2.0E-01 | 7.4E-01 | 1.3E-02 | 7.6E-01 | 3.6E-01 | 2.3E-01 | 2.4E-02 | 3.9E-01 |
| GO:0044253 | GO:Bio L4  | positive regulation of multicellular organismal metabolic process        | 2.8E-01 | 7.0E-02 | 8.0E-02 | 1.9E-01 | 2.0E-01 | 7.4E-01 | 4.6E-02 | 4.3E-01 | 2.1E-01 | 2.1E-01 | 2.4E-02 | 2.9E-01 |
| GO:0045595 | GO:Bio L4  | regulation of cell differentiation                                       | 1.5E-01 | 3.3E-02 | 1.2E-01 | 5.5E-02 | 1.9E-01 | 6.3E-01 | 3.2E-02 | 9.4E-01 | 1.3E-01 | 1.0E-01 | 2.4E-02 | 2.1E-01 |
| GO:0021772 | GO:Bio L4  | olfactory bulb development                                               | 8.1E-01 | 6.0E-01 | 3.4E-02 | 2.8E-02 | 8.7E-02 | 3.8E-01 | 1.1E-01 | 8.9E-01 | 2.6E-01 | 5.7E-01 | 2.5E-02 | 1.2E-01 |
| GO:0021988 | GO:Bio L4  | olfactory lobe development                                               | 8.0E-01 | 6.4E-01 | 3.1E-02 | 2.9E-02 | 1.0E-01 | 4.2E-01 | 1.2E-01 | 8.6E-01 | 2.9E-01 | 6.2E-01 | 2.5E-02 | 1.2E-01 |
| GO:0019899 | GO:Mole L4 | enzyme binding                                                           | 1.6E-01 | 8.8E-03 | 1.9E-01 | 1.1E-01 | 4.8E-01 | 8.0E-02 | 2.0E-02 | 2.0E-01 | 2.7E-01 | 5.8E-03 | 2.5E-02 | 1.1E-01 |
| GO:0051129 | GO:Bio L4  | negative regulation of cellular component organization                   | 2.3E-01 | 3.9E-02 | 1.8E-01 | 1.1E-01 | 1.4E-02 | 2.6E-02 | 2.1E-02 | 8.6E-01 | 2.1E-02 | 7.9E-03 | 2.5E-02 | 3.2E-01 |
| GO:0015232 | GO:Mole L4 | heme transporter activity                                                | 2.7E-01 | 9.1E-01 | 9.4E-01 | 9.8E-01 | 3.1E-01 | 4.5E-01 | 4.0E-03 | 3.3E-01 | 2.9E-01 | 7.8E-01 | 2.5E-02 | 6.8E-01 |
| GO:0007162 | GO:Bio L4  | negative regulation of cell adhesion                                     | 4.8E-02 | 2.0E-01 | 9.4E-02 | 1.8E-01 | 7.2E-01 | 9.8E-01 | 4.0E-02 | 3.0E-01 | 1.5E-01 | 5.2E-01 | 2.5E-02 | 2.1E-01 |
| GO:0051130 | GO:Bio L4  | positive regulation of cellular component organization                   | 2.9E-01 | 1.0E-01 | 5.4E-01 | 5.0E-01 | 8.4E-02 | 1.5E-01 | 7.1E-03 | 8.3E-01 | 1.1E-01 | 7.9E-02 | 2.5E-02 | 7.8E-01 |
| GO:0035107 | GO:Bio L4  | appendage morphogenesis                                                  | 1.9E-01 | 1.9E-01 | 2.3E-02 | 6.8E-02 | 8.4E-03 | 3.2E-01 | 1.7E-01 | 9.2E-01 | 1.2E-02 | 2.3E-01 | 2.5E-02 | 2.4E-01 |
| GO:0031966 | GO:Cell L4 | mitochondrial membrane                                                   | 9.7E-01 | 6.3E-01 | 4.7E-01 | 3.0E-01 | 7.3E-01 | 8.3E-01 | 8.2E-03 | 1.1E-01 | 9.5E-01 | 8.6E-01 | 2.5E-02 | 1.4E-01 |
| GO:0060255 | GO:Bio L4  | regulation of macromolecule metabolic process                            | 1.2E-01 | 1.6E-02 | 2.2E-01 | 1.0E-01 | 9.1E-02 | 3.2E-01 | 1.8E-02 | 7.9E-01 | 5.8E-02 | 3.2E-02 | 2.6E-02 | 2.8E-01 |
| GO:0030031 | GO:Bio L4  | cell projection assembly                                                 | 9.9E-02 | 1.4E-01 | 4.5E-01 | 5.0E-01 | 1.1E-01 | 7.8E-01 | 8.7E-03 | 4.7E-01 | 6.0E-02 | 3.6E-01 | 2.6E-02 | 5.8E-01 |
| GO:0071604 | GO:Bio L4  | transforming growth factor-beta production                               | 3.7E-02 | 1.1E-01 | 5.0E-01 | 1.7E-01 | 1.0E+00 | 9.4E-01 | 8.0E-03 | 7.6E-01 | 1.6E-01 | 3.4E-01 | 2.6E-02 | 4.0E-01 |
| GO:0044459 | GO:Cell L4 | plasma membrane part                                                     | 3.0E-01 | 6.9E-03 | 6.7E-02 | 2.5E-02 | 7.3E-01 | 4.1E-01 | 6.0E-02 | 4.6E-02 | 5.5E-01 | 1.9E-02 | 2.6E-02 | 8.9E-03 |
| GO:0007626 | GO:Bio L4  | locomotory behavior                                                      | 2.3E-02 | 3.9E-02 | 1.1E-02 | 1.7E-03 | 1.0E-01 | 6.6E-02 | 3.7E-01 | 1.2E-01 | 1.7E-02 | 1.8E-02 | 2.6E-02 | 1.9E-03 |
| GO:0060074 | GO:Bio L4  | synapse maturation                                                       | 9.9E-01 | 9.9E-01 | 7.2E-01 | 6.7E-01 | 4.6E-01 | 6.6E-01 | 5.6E-03 | 2.6E-01 | 8.1E-01 | 9.3E-01 | 2.6E-02 | 4.8E-01 |
| GO:0031090 | GO:Cell L4 | organelle membrane                                                       | 7.4E-01 | 1.5E-01 | 4.2E-01 | 1.9E-01 | 7.4E-01 | 4.7E-01 | 9.7E-03 | 2.1E-01 | 8.7E-01 | 2.6E-01 | 2.6E-02 | 1.7E-01 |
| GO:0000117 | GO:Bio L4  | regulation of transcription involved in G2/M-phase of mitotic cell cycle | 3.6E-01 | 5.3E-01 | 1.4E-02 | 1.1E-02 | 3.1E-01 | 6.2E-01 | 2.8E-01 | 9.4E-01 | 3.5E-01 | 7.0E-01 | 2.6E-02 | 5.7E-02 |
| GO:0044425 | GO:Cell L4 | membrane part                                                            | 6.6E-01 | 8.6E-02 | 2.1E-01 | 5.4E-02 | 7.6E-01 | 1.7E-01 | 2.0E-02 | 1.6E-01 | 8.5E-01 | 7.5E-02 | 2.7E-02 | 4.9E-02 |

|            |            |                                                       |         |         |         |         |         |         |         |         |         |         |         |         |
|------------|------------|-------------------------------------------------------|---------|---------|---------|---------|---------|---------|---------|---------|---------|---------|---------|---------|
| GO:0045822 | GO:Bio L4  | negative regulation of heart contraction              | 1.8E-01 | 4.1E-01 | 6.0E-02 | 7.1E-02 | 3.2E-02 | 4.0E-01 | 7.0E-02 | 5.6E-01 | 3.5E-02 | 4.6E-01 | 2.7E-02 | 1.7E-01 |
| GO:0019098 | GO:Bio L4  | reproductive behavior                                 | 2.6E-01 | 8.0E-02 | 6.6E-03 | 6.5E-03 | 6.2E-01 | 7.1E-01 | 6.3E-01 | 1.0E+00 | 4.5E-01 | 2.2E-01 | 2.7E-02 | 3.9E-02 |
| GO:0009792 | GO:Bio L4  | embryonic development ending in birth or egg hatching | 5.8E-01 | 3.8E-01 | 6.3E-02 | 5.4E-02 | 3.7E-01 | 1.2E-01 | 6.6E-02 | 8.1E-01 | 5.4E-01 | 1.9E-01 | 2.7E-02 | 1.8E-01 |
| GO:0050662 | GO:Mole L4 | coenzyme binding                                      | 2.6E-01 | 7.6E-02 | 1.3E-01 | 5.9E-02 | 9.3E-01 | 5.7E-01 | 3.3E-02 | 4.5E-01 | 5.9E-01 | 1.8E-01 | 2.7E-02 | 1.2E-01 |
| GO:0005737 | GO:Cell L4 | cytoplasm                                             | 6.5E-01 | 7.0E-02 | 1.9E-01 | 8.2E-02 | 2.8E-01 | 1.9E-02 | 2.3E-02 | 3.6E-01 | 4.9E-01 | 1.0E-02 | 2.7E-02 | 1.3E-01 |
| GO:0044093 | GO:Bio L4  | positive regulation of molecular function             | 2.3E-02 | 1.0E-04 | 6.3E-02 | 1.9E-02 | 9.2E-01 | 2.3E-01 | 6.8E-02 | 6.1E-01 | 1.0E-01 | 2.7E-04 | 2.8E-02 | 6.4E-02 |
| GO:0030335 | GO:Bio L4  | positive regulation of cell migration                 | 9.4E-02 | 1.8E-01 | 1.2E-01 | 8.1E-02 | 3.3E-02 | 1.6E-01 | 3.7E-02 | 2.7E-01 | 2.1E-02 | 1.3E-01 | 2.8E-02 | 1.1E-01 |
| 4060       | KEGG       | Cytokine-cytokine receptor interaction                | 1.5E-02 | 2.3E-02 | 1.8E-02 | 5.5E-02 | 3.2E-01 | 1.4E-01 | 2.5E-01 | 9.4E-01 | 3.0E-02 | 2.2E-02 | 2.8E-02 | 2.0E-01 |
| GO:0031346 | GO:Bio L4  | positive regulation of cell projection organization   | 7.8E-01 | 6.4E-01 | 8.2E-01 | 9.7E-01 | 3.0E-01 | 9.2E-01 | 5.3E-03 | 1.0E+00 | 5.7E-01 | 9.0E-01 | 2.8E-02 | 1.0E+00 |
| GO:0033554 | GO:Bio L4  | cellular response to stress                           | 3.2E-02 | 3.1E-02 | 7.6E-02 | 7.2E-02 | 3.4E-01 | 4.4E-01 | 5.7E-02 | 6.6E-01 | 6.0E-02 | 7.3E-02 | 2.8E-02 | 1.9E-01 |
| GO:0004096 | GO:Mole L4 | catalase activity                                     | 1.4E-01 | 6.6E-02 | 1.4E-02 | 7.2E-03 | 9.6E-01 | 9.5E-01 | 3.1E-01 | 7.7E-01 | 4.0E-01 | 2.4E-01 | 2.8E-02 | 3.4E-02 |
| GO:0008013 | GO:Mole L4 | beta-catenin binding                                  | 5.5E-01 | 9.2E-01 | 5.5E-01 | 4.2E-01 | 9.7E-02 | 4.3E-01 | 8.0E-03 | 1.7E-01 | 2.1E-01 | 7.6E-01 | 2.8E-02 | 2.6E-01 |
| GO:0010942 | GO:Bio L4  | positive regulation of cell death                     | 4.0E-04 | 5.0E-05 | 2.6E-02 | 1.4E-02 | 6.0E-01 | 8.6E-01 | 1.7E-01 | 2.4E-01 | 2.2E-03 | 4.8E-04 | 2.8E-02 | 2.2E-02 |
| GO:0030901 | GO:Bio L4  | midbrain development                                  | 1.8E-01 | 1.9E-01 | 7.0E-02 | 6.6E-02 | 5.5E-01 | 1.7E-01 | 6.4E-02 | 4.6E-01 | 3.2E-01 | 1.4E-01 | 2.9E-02 | 1.4E-01 |
| GO:0051917 | GO:Bio L4  | regulation of fibrinolysis                            | 4.5E-01 | 6.2E-01 | 3.6E-01 | 1.8E-01 | 6.6E-01 | 7.3E-01 | 1.2E-02 | 7.1E-01 | 6.6E-01 | 8.1E-01 | 2.9E-02 | 3.8E-01 |
| GO:0048736 | GO:Bio L4  | appendage development                                 | 2.2E-01 | 1.6E-01 | 2.6E-02 | 7.0E-02 | 8.4E-03 | 3.4E-01 | 1.8E-01 | 9.1E-01 | 1.3E-02 | 2.1E-01 | 2.9E-02 | 2.4E-01 |
| GO:0060341 | GO:Bio L4  | regulation of cellular localization                   | 2.3E-01 | 7.5E-03 | 2.3E-01 | 3.1E-01 | 1.4E-01 | 3.8E-01 | 2.0E-02 | 6.7E-01 | 1.5E-01 | 2.0E-02 | 2.9E-02 | 5.3E-01 |
| GO:0001941 | GO:Bio L4  | postsynaptic membrane organization                    | 7.4E-02 | 4.4E-02 | 4.1E-02 | 6.7E-02 | 5.9E-01 | 6.6E-01 | 1.1E-01 | 4.2E-01 | 1.8E-01 | 1.3E-01 | 2.9E-02 | 1.3E-01 |
| GO:0016020 | GO:Cell L4 | membrane                                              | 6.9E-01 | 4.8E-02 | 2.3E-01 | 7.0E-02 | 7.2E-01 | 1.6E-01 | 2.0E-02 | 1.7E-01 | 8.4E-01 | 4.5E-02 | 2.9E-02 | 6.3E-02 |
| GO:0048518 | GO:Bio L2  | positive regulation of biological process             | 5.1E-02 | 1.3E-03 | 1.1E-01 | 1.4E-01 | 1.5E-01 | 2.2E-01 | 4.5E-02 | 5.9E-01 | 4.6E-02 | 2.6E-03 | 3.0E-02 | 2.9E-01 |
| GO:0048518 | GO:Bio L4  | positive regulation of biological process             | 5.1E-02 | 1.3E-03 | 1.1E-01 | 1.4E-01 | 1.5E-01 | 2.2E-01 | 4.5E-02 | 5.9E-01 | 4.6E-02 | 2.6E-03 | 3.0E-02 | 2.9E-01 |
| GO:0048469 | GO:Bio L4  | cell maturation                                       | 1.6E-01 | 9.0E-02 | 8.1E-02 | 4.3E-02 | 6.3E-01 | 1.8E-01 | 5.9E-02 | 3.6E-01 | 3.4E-01 | 8.3E-02 | 3.0E-02 | 7.9E-02 |
| GO:0045637 | GO:Bio L4  | regulation of myeloid cell differentiation            | 3.4E-01 | 2.7E-01 | 3.6E-02 | 9.5E-02 | 4.7E-01 | 7.1E-01 | 1.3E-01 | 2.7E-01 | 4.5E-01 | 5.0E-01 | 3.0E-02 | 1.2E-01 |
| GO:0044464 | GO:Cell L2 | cell part                                             | 5.1E-01 | 2.0E-02 | 2.1E-01 | 6.7E-02 | 1.4E-01 | 2.1E-02 | 2.3E-02 | 4.3E-01 | 2.5E-01 | 3.7E-03 | 3.0E-02 | 1.3E-01 |
| GO:0005623 | GO:Cell L2 | cell                                                  | 5.1E-01 | 2.0E-02 | 2.1E-01 | 6.7E-02 | 1.4E-01 | 2.1E-02 | 2.3E-02 | 4.4E-01 | 2.5E-01 | 3.7E-03 | 3.0E-02 | 1.3E-01 |

|            |            |                                                                  |         |         |         |         |         |         |         |         |         |         |         |         |
|------------|------------|------------------------------------------------------------------|---------|---------|---------|---------|---------|---------|---------|---------|---------|---------|---------|---------|
| GO:0008565 | GO:Mole L4 | protein transporter activity                                     | 6.4E-01 | 3.9E-01 | 3.6E-02 | 5.7E-02 | 1.7E-01 | 3.1E-01 | 1.4E-01 | 6.0E-01 | 3.5E-01 | 3.8E-01 | 3.0E-02 | 1.5E-01 |
| GO:0045454 | GO:Bio L4  | cell redox homeostasis                                           | 9.4E-01 | 6.6E-01 | 6.0E-01 | 8.7E-01 | 3.7E-01 | 6.8E-01 | 8.2E-03 | 3.5E-01 | 7.2E-01 | 8.1E-01 | 3.1E-02 | 6.7E-01 |
| GO:0060089 | GO:Mole L2 | molecular transducer activity                                    | 5.5E-01 | 8.3E-02 | 2.1E-01 | 2.3E-01 | 1.2E-01 | 1.8E-01 | 2.4E-02 | 5.9E-01 | 2.4E-01 | 7.7E-02 | 3.1E-02 | 4.1E-01 |
| GO:0043226 | GO:Cell L2 | organelle                                                        | 4.1E-01 | 2.2E-02 | 2.2E-01 | 6.6E-02 | 9.3E-02 | 1.4E-02 | 2.2E-02 | 6.0E-01 | 1.6E-01 | 2.9E-03 | 3.1E-02 | 1.7E-01 |
| GO:0034623 | GO:Bio L4  | cellular macromolecular complex disassembly                      | 2.7E-01 | 1.6E-01 | 4.7E-01 | 3.8E-01 | 2.6E-01 | 5.1E-02 | 1.1E-02 | 9.5E-01 | 2.6E-01 | 4.7E-02 | 3.1E-02 | 7.3E-01 |
| GO:0006810 | GO:Bio L4  | transport                                                        | 4.1E-01 | 7.7E-03 | 3.6E-01 | 1.3E-01 | 8.9E-02 | 1.9E-02 | 1.4E-02 | 4.7E-01 | 1.6E-01 | 1.5E-03 | 3.2E-02 | 2.3E-01 |
| GO:0008152 | GO:Bio L2  | metabolic process                                                | 3.6E-01 | 1.6E-02 | 1.1E-01 | 5.9E-02 | 2.8E-01 | 2.5E-01 | 4.7E-02 | 5.7E-01 | 3.3E-01 | 2.6E-02 | 3.2E-02 | 1.5E-01 |
| 4742       | KEGG       | Taste transduction                                               | 4.3E-01 | 1.9E-01 | 8.0E-02 | 8.9E-02 | 1.5E-01 | 6.5E-01 | 6.5E-02 | 3.5E-01 | 2.4E-01 | 3.8E-01 | 3.2E-02 | 1.4E-01 |
| GO:0048522 | GO:Bio L4  | positive regulation of cellular process                          | 3.6E-02 | 9.0E-04 | 1.2E-01 | 1.2E-01 | 1.8E-01 | 4.1E-01 | 4.2E-02 | 5.8E-01 | 3.9E-02 | 3.3E-03 | 3.3E-02 | 2.6E-01 |
| GO:0060398 | GO:Bio L4  | regulation of growth hormone receptor signaling pathway          | 3.4E-02 | 1.1E-01 | 1.2E-02 | 1.1E-02 | 6.3E-01 | 6.8E-02 | 4.3E-01 | 2.9E-01 | 1.0E-01 | 4.3E-02 | 3.3E-02 | 2.1E-02 |
| GO:0060399 | GO:Bio L4  | positive regulation of growth hormone receptor signaling pathway | 3.4E-02 | 1.1E-01 | 1.2E-02 | 1.1E-02 | 6.3E-01 | 6.8E-02 | 4.3E-01 | 2.9E-01 | 1.0E-01 | 4.3E-02 | 3.3E-02 | 2.1E-02 |
| GO:0005615 | GO:Cell L4 | extracellular space                                              | 1.0E-01 | 2.0E-01 | 1.0E-01 | 7.7E-02 | 3.8E-01 | 2.4E-01 | 5.1E-02 | 4.8E-01 | 1.6E-01 | 1.9E-01 | 3.3E-02 | 1.6E-01 |
| GO:0010638 | GO:Bio L4  | positive regulation of organelle organization                    | 4.8E-01 | 3.8E-01 | 4.1E-01 | 3.1E-01 | 7.7E-02 | 3.1E-01 | 1.3E-02 | 3.7E-01 | 1.6E-01 | 3.7E-01 | 3.3E-02 | 3.7E-01 |
| GO:0043229 | GO:Cell L4 | intracellular organelle                                          | 4.1E-01 | 2.2E-02 | 2.3E-01 | 6.9E-02 | 9.3E-02 | 1.5E-02 | 2.3E-02 | 6.0E-01 | 1.6E-01 | 2.9E-03 | 3.3E-02 | 1.7E-01 |
| GO:0050790 | GO:Bio L4  | regulation of catalytic activity                                 | 1.4E-01 | 1.3E-02 | 5.5E-02 | 5.0E-02 | 5.1E-01 | 2.1E-01 | 9.5E-02 | 7.4E-01 | 2.6E-01 | 1.9E-02 | 3.3E-02 | 1.6E-01 |
| GO:0051234 | GO:Bio L2  | establishment of localization                                    | 4.0E-01 | 6.6E-03 | 4.0E-01 | 1.5E-01 | 9.7E-02 | 1.8E-02 | 1.3E-02 | 5.0E-01 | 1.6E-01 | 1.2E-03 | 3.3E-02 | 2.6E-01 |
| GO:0030334 | GO:Bio L4  | regulation of cell migration                                     | 1.4E-02 | 6.2E-03 | 1.7E-02 | 1.7E-02 | 1.3E-02 | 1.9E-01 | 3.2E-01 | 4.3E-01 | 1.7E-03 | 8.9E-03 | 3.3E-02 | 4.3E-02 |
| GO:0031018 | GO:Bio L4  | endocrine pancreas development                                   | 4.0E-01 | 4.8E-01 | 8.5E-02 | 1.2E-01 | 7.5E-01 | 7.1E-01 | 6.2E-02 | 7.2E-01 | 6.6E-01 | 7.1E-01 | 3.3E-02 | 3.0E-01 |
| GO:0017145 | GO:Bio L4  | stem cell division                                               | 2.7E-01 | 1.1E-01 | 1.3E-02 | 3.9E-02 | 9.0E-01 | 6.6E-01 | 4.0E-01 | 9.2E-02 | 5.9E-01 | 2.6E-01 | 3.3E-02 | 2.4E-02 |
| GO:0006766 | GO:Bio L4  | vitamin metabolic process                                        | 1.7E-01 | 5.4E-02 | 4.6E-01 | 4.0E-01 | 5.5E-01 | 8.6E-01 | 1.2E-02 | 2.4E-01 | 3.1E-01 | 1.9E-01 | 3.3E-02 | 3.2E-01 |
| GO:0009790 | GO:Bio L4  | embryonic development                                            | 5.5E-01 | 5.2E-01 | 4.1E-02 | 6.7E-02 | 2.7E-01 | 2.0E-01 | 1.3E-01 | 8.5E-01 | 4.3E-01 | 3.4E-01 | 3.3E-02 | 2.2E-01 |
| GO:0021537 | GO:Bio L4  | telencephalon development                                        | 1.2E-01 | 6.7E-02 | 3.6E-02 | 1.6E-02 | 3.7E-01 | 8.3E-02 | 1.5E-01 | 9.2E-01 | 1.8E-01 | 3.4E-02 | 3.3E-02 | 7.6E-02 |
| GO:0051219 | GO:Mole L4 | phosphoprotein binding                                           | 8.5E-02 | 5.3E-02 | 3.5E-02 | 3.1E-02 | 7.6E-01 | 8.3E-01 | 1.5E-01 | 2.1E-01 | 2.4E-01 | 1.8E-01 | 3.3E-02 | 4.0E-02 |

|             |            |                                                                               |         |         |         |         |         |         |         |         |         |         |         |         |
|-------------|------------|-------------------------------------------------------------------------------|---------|---------|---------|---------|---------|---------|---------|---------|---------|---------|---------|---------|
| GO:0043231  | GO:Cell L4 | intracellular membrane-bounded organelle                                      | 4.8E-01 | 3.7E-02 | 1.8E-01 | 3.8E-02 | 1.2E-01 | 4.1E-02 | 3.0E-02 | 5.9E-01 | 2.3E-01 | 1.1E-02 | 3.4E-02 | 1.1E-01 |
| GO:0016679  | GO:Mole L4 | oxidoreductase activity, acting on diphenols and related substances as donors | 8.5E-01 | 9.4E-02 | 3.6E-02 | 5.5E-02 | 3.9E-01 | 1.5E-01 | 1.5E-01 | 9.7E-01 | 7.0E-01 | 7.3E-02 | 3.4E-02 | 2.1E-01 |
| GO:0046661  | GO:Bio L4  | male sex differentiation                                                      | 1.2E-01 | 1.5E-01 | 3.1E-02 | 2.7E-02 | 7.5E-01 | 1.7E-01 | 1.8E-01 | 6.8E-02 | 3.0E-01 | 1.2E-01 | 3.4E-02 | 1.3E-02 |
| GO:0002520  | GO:Bio L4  | immune system development                                                     | 1.3E-02 | 7.9E-03 | 1.3E-02 | 1.4E-02 | 5.5E-01 | 3.9E-01 | 4.1E-01 | 4.5E-01 | 4.1E-02 | 2.1E-02 | 3.4E-02 | 3.8E-02 |
| GO:0048858  | GO:Bio L4  | cell projection morphogenesis                                                 | 2.0E-01 | 1.1E-01 | 2.9E-02 | 4.6E-02 | 7.9E-02 | 3.5E-01 | 1.9E-01 | 5.2E-01 | 8.1E-02 | 1.6E-01 | 3.4E-02 | 1.1E-01 |
| GO:0033504  | GO:Bio L4  | floor plate development                                                       | 6.1E-01 | 3.9E-01 | 3.9E-02 | 1.1E-01 | 3.1E-01 | 4.0E-01 | 1.4E-01 | 9.7E-01 | 5.0E-01 | 4.5E-01 | 3.4E-02 | 3.5E-01 |
| GO:0070727  | GO:Bio L4  | cellular macromolecule localization                                           | 3.5E-01 | 7.0E-02 | 2.6E-01 | 9.8E-02 | 2.4E-01 | 4.5E-01 | 2.1E-02 | 3.8E-01 | 2.9E-01 | 1.4E-01 | 3.5E-02 | 1.6E-01 |
| GO:0044424  | GO:Cell L4 | intracellular part                                                            | 5.2E-01 | 2.9E-02 | 2.2E-01 | 8.2E-02 | 5.8E-02 | 1.1E-02 | 2.5E-02 | 5.0E-01 | 1.4E-01 | 2.9E-03 | 3.5E-02 | 1.7E-01 |
| GO:0048634  | GO:Bio L4  | regulation of muscle organ development                                        | 2.7E-02 | 5.6E-02 | 4.7E-01 | 4.0E-01 | 7.2E-01 | 5.4E-01 | 1.2E-02 | 7.6E-01 | 9.5E-02 | 1.4E-01 | 3.5E-02 | 6.7E-01 |
| GO:0050877  | GO:Bio L4  | neurological system process                                                   | 2.1E-01 | 9.2E-02 | 3.0E-01 | 3.9E-01 | 3.0E-01 | 2.0E-01 | 1.9E-02 | 3.4E-01 | 2.4E-01 | 9.1E-02 | 3.5E-02 | 4.0E-01 |
| GO:0070576  | GO:Mole L4 | vitamin D 24-hydroxylase activity                                             | 6.5E-01 | 3.1E-01 | 4.1E-01 | 5.7E-01 | 4.6E-01 | 2.7E-01 | 1.4E-02 | 9.9E-01 | 6.6E-01 | 2.9E-01 | 3.5E-02 | 8.9E-01 |
| GO:0046677  | GO:Bio L4  | response to antibiotic                                                        | 1.3E-01 | 1.0E-02 | 2.1E-02 | 4.4E-02 | 1.0E+00 | 1.0E+00 | 2.7E-01 | 7.9E-01 | 4.0E-01 | 5.6E-02 | 3.5E-02 | 1.5E-01 |
| GO:0044249  | GO:Bio L4  | cellular biosynthetic process                                                 | 1.6E-01 | 6.5E-03 | 1.1E-01 | 5.8E-02 | 2.4E-01 | 6.1E-01 | 5.5E-02 | 8.4E-01 | 1.6E-01 | 2.6E-02 | 3.5E-02 | 1.9E-01 |
| GO:0017053  | GO:Cell L4 | transcriptional repressor complex                                             | 3.6E-01 | 2.6E-01 | 6.3E-03 | 1.2E-02 | 3.1E-01 | 4.7E-01 | 9.1E-01 | 8.6E-01 | 3.6E-01 | 3.8E-01 | 3.5E-02 | 5.9E-02 |
| GO:0048514  | GO:Bio L4  | blood vessel morphogenesis                                                    | 2.0E-01 | 1.8E-01 | 1.4E-02 | 9.7E-03 | 6.5E-01 | 1.9E-01 | 4.2E-01 | 6.2E-01 | 3.9E-01 | 1.5E-01 | 3.5E-02 | 3.7E-02 |
| GO:0005622  | GO:Cell L4 | intracellular                                                                 | 5.4E-01 | 3.4E-02 | 2.3E-01 | 8.5E-02 | 5.4E-02 | 1.1E-02 | 2.6E-02 | 5.4E-01 | 1.3E-01 | 3.2E-03 | 3.5E-02 | 1.9E-01 |
| GO:0044444  | GO:Cell L4 | cytoplasmic part                                                              | 6.1E-01 | 6.7E-02 | 2.8E-01 | 1.1E-01 | 7.1E-01 | 1.1E-01 | 2.1E-02 | 4.2E-01 | 7.9E-01 | 4.3E-02 | 3.6E-02 | 1.8E-01 |
| PA145011114 | PharmGKB   | pgkb_pwy_Warfarin_Pathway_PD                                                  | 2.5E-01 | 2.7E-01 | 1.5E-02 | 1.8E-02 | 2.2E-02 | 2.4E-01 | 3.9E-01 | 3.1E-01 | 3.4E-02 | 2.4E-01 | 3.6E-02 | 3.4E-02 |
| GO:0005518  | GO:Mole L4 | collagen binding                                                              | 3.3E-01 | 1.8E-01 | 8.5E-01 | 5.9E-01 | 2.2E-01 | 4.4E-01 | 6.9E-03 | 1.2E-01 | 2.6E-01 | 2.8E-01 | 3.6E-02 | 2.6E-01 |
| GO:0031975  | GO:Cell L4 | envelope                                                                      | 9.4E-01 | 5.5E-01 | 5.5E-01 | 3.4E-01 | 7.4E-01 | 5.7E-01 | 1.1E-02 | 1.8E-01 | 9.5E-01 | 6.8E-01 | 3.6E-02 | 2.3E-01 |
| GO:0050793  | GO:Bio L4  | regulation of developmental process                                           | 7.0E-02 | 2.0E-02 | 1.0E-01 | 5.4E-02 | 4.2E-01 | 6.3E-01 | 5.6E-02 | 8.8E-01 | 1.3E-01 | 6.8E-02 | 3.6E-02 | 1.9E-01 |
| GO:0015031  | GO:Bio L4  | protein transport                                                             | 5.8E-01 | 8.0E-02 | 1.3E-01 | 2.7E-02 | 3.1E-02 | 9.2E-02 | 4.4E-02 | 8.3E-01 | 9.1E-02 | 4.4E-02 | 3.6E-02 | 1.1E-01 |
| GO:0051709  | GO:Bio L4  | regulation of killing of cells of another organism                            | 1.2E-02 | 2.5E-02 | 8.3E-02 | 7.2E-02 | 2.2E-01 | 1.8E-01 | 7.1E-02 | 1.6E-01 | 1.7E-02 | 2.8E-02 | 3.6E-02 | 6.4E-02 |

|            |            |                                                                          |         |         |         |         |         |         |         |         |         |         |         |         |
|------------|------------|--------------------------------------------------------------------------|---------|---------|---------|---------|---------|---------|---------|---------|---------|---------|---------|---------|
| GO:0031967 | GO:Cell L4 | organelle envelope                                                       | 9.3E-01 | 5.2E-01 | 5.4E-01 | 3.1E-01 | 7.1E-01 | 5.7E-01 | 1.1E-02 | 1.7E-01 | 9.3E-01 | 6.6E-01 | 3.6E-02 | 2.0E-01 |
| GO:0032970 | GO:Bio L4  | regulation of actin filament-based process                               | 1.9E-01 | 2.8E-02 | 8.3E-02 | 6.1E-02 | 1.9E-02 | 3.1E-03 | 7.1E-02 | 9.8E-01 | 2.4E-02 | 9.1E-04 | 3.6E-02 | 2.3E-01 |
| GO:0000822 | GO:Mole L4 | inositol hexakisphosphate binding                                        | 7.6E-02 | 1.7E-01 | 2.5E-01 | 2.5E-01 | 7.0E-01 | 4.8E-01 | 2.4E-02 | 7.1E-01 | 2.1E-01 | 2.8E-01 | 3.6E-02 | 4.8E-01 |
| GO:0070679 | GO:Mole L4 | inositol 1,4,5 trisphosphate binding                                     | 7.6E-02 | 1.7E-01 | 2.5E-01 | 2.5E-01 | 7.0E-01 | 4.8E-01 | 2.4E-02 | 7.1E-01 | 2.1E-01 | 2.8E-01 | 3.6E-02 | 4.8E-01 |
| GO:0051270 | GO:Bio L4  | regulation of cellular component movement                                | 1.7E-02 | 5.4E-03 | 1.8E-02 | 2.0E-02 | 2.8E-02 | 2.7E-01 | 3.3E-01 | 3.6E-01 | 4.1E-03 | 1.1E-02 | 3.7E-02 | 4.3E-02 |
| GO:0031988 | GO:Cell L4 | membrane-bounded vesicle                                                 | 9.6E-01 | 9.0E-01 | 3.6E-01 | 1.0E-01 | 4.2E-01 | 2.4E-01 | 1.7E-02 | 5.3E-01 | 7.7E-01 | 5.4E-01 | 3.7E-02 | 2.1E-01 |
| GO:0071204 | GO:Cell L4 | histone pre-mRNA 3'end processing complex                                | 5.6E-01 | 1.5E-01 | 3.2E-02 | 1.8E-02 | 4.4E-02 | 1.7E-01 | 1.9E-01 | 2.8E-01 | 1.2E-01 | 1.2E-01 | 3.7E-02 | 3.1E-02 |
| GO:0000083 | GO:Bio L4  | regulation of transcription involved in G1/S-phase of mitotic cell cycle | 2.4E-01 | 1.4E-01 | 7.7E-02 | 5.5E-02 | 3.6E-02 | 3.1E-01 | 7.9E-02 | 3.7E-01 | 5.0E-02 | 1.8E-01 | 3.7E-02 | 1.0E-01 |
| GO:0051272 | GO:Bio L4  | positive regulation of cellular component movement                       | 7.9E-02 | 1.0E-01 | 1.7E-01 | 1.1E-01 | 4.4E-02 | 2.1E-01 | 3.7E-02 | 1.7E-01 | 2.3E-02 | 1.0E-01 | 3.7E-02 | 9.3E-02 |
| GO:0005604 | GO:Cell L4 | basement membrane                                                        | 1.6E-01 | 9.7E-02 | 3.3E-01 | 1.2E-01 | 9.1E-01 | 5.1E-01 | 1.9E-02 | 3.9E-01 | 4.3E-01 | 2.0E-01 | 3.8E-02 | 1.9E-01 |
| 4012       | KEGG       | ErbB signaling pathway                                                   | 6.1E-01 | 8.1E-01 | 7.5E-01 | 8.7E-01 | 2.5E-01 | 9.3E-02 | 8.3E-03 | 8.9E-02 | 4.4E-01 | 2.7E-01 | 3.8E-02 | 2.8E-01 |
| GO:0009888 | GO:Bio L4  | tissue development                                                       | 1.4E-01 | 1.1E-01 | 7.0E-02 | 8.5E-02 | 1.9E-01 | 2.0E-01 | 8.8E-02 | 9.2E-01 | 1.2E-01 | 1.0E-01 | 3.8E-02 | 2.8E-01 |
| GO:0005834 | GO:Cell L4 | heterotrimeric G-protein complex                                         | 1.2E-01 | 1.0E-01 | 2.3E-02 | 2.6E-02 | 1.4E-01 | 4.5E-01 | 2.8E-01 | 9.7E-01 | 8.4E-02 | 1.8E-01 | 3.8E-02 | 1.2E-01 |
| GO:0032984 | GO:Bio L4  | macromolecular complex disassembly                                       | 2.9E-01 | 1.7E-01 | 4.9E-01 | 4.0E-01 | 2.8E-01 | 5.8E-02 | 1.3E-02 | 9.4E-01 | 2.9E-01 | 5.6E-02 | 3.8E-02 | 7.5E-01 |
| GO:0030528 | GO:Mole L2 | transcription regulator activity                                         | 6.2E-02 | 4.6E-03 | 1.3E-01 | 3.9E-02 | 3.7E-01 | 3.0E-01 | 4.9E-02 | 8.0E-01 | 1.1E-01 | 1.0E-02 | 3.8E-02 | 1.4E-01 |
| GO:0031334 | GO:Bio L4  | positive regulation of protein complex assembly                          | 7.0E-01 | 4.0E-01 | 2.9E-01 | 2.4E-01 | 5.0E-01 | 1.5E-01 | 2.2E-02 | 9.1E-01 | 7.2E-01 | 2.3E-01 | 3.9E-02 | 5.5E-01 |
| GO:0048551 | GO:Mole L4 | metalloenzyme inhibitor activity                                         | 3.9E-02 | 8.8E-02 | 3.4E-01 | 1.5E-01 | 2.1E-01 | 1.7E-01 | 1.9E-02 | 7.5E-01 | 4.7E-02 | 7.8E-02 | 3.9E-02 | 3.6E-01 |
| GO:0001967 | GO:Bio L4  | suckling behavior                                                        | 2.6E-01 | 3.3E-01 | 1.7E-02 | 1.0E-01 | 5.7E-01 | 6.0E-01 | 3.8E-01 | 8.6E-02 | 4.4E-01 | 5.2E-01 | 3.9E-02 | 5.1E-02 |
| GO:0031371 | GO:Cell L4 | ubiquitin conjugating enzyme complex                                     | 2.0E-01 | 1.8E-01 | 1.6E-01 | 1.9E-01 | 9.2E-01 | 8.0E-01 | 4.2E-02 | 6.6E-01 | 5.0E-01 | 4.2E-01 | 3.9E-02 | 3.8E-01 |
| GO:0009890 | GO:Bio L4  | negative regulation of biosynthetic process                              | 6.3E-01 | 3.3E-01 | 3.2E-01 | 2.0E-01 | 4.3E-01 | 9.0E-01 | 2.1E-02 | 6.5E-01 | 6.3E-01 | 6.6E-01 | 4.0E-02 | 3.9E-01 |
| GO:0035295 | GO:Bio L4  | tube development                                                         | 1.3E-01 | 2.3E-01 | 1.6E-01 | 1.1E-01 | 8.6E-02 | 3.4E-03 | 4.1E-02 | 2.8E-01 | 6.3E-02 | 6.3E-03 | 4.0E-02 | 1.3E-01 |

|            |            |                                                                       |         |         |         |         |         |         |         |         |         |         |         |         |
|------------|------------|-----------------------------------------------------------------------|---------|---------|---------|---------|---------|---------|---------|---------|---------|---------|---------|---------|
| GO:0006139 | GO:Bio L4  | nucleobase, nucleoside, nucleotide and nucleic acid metabolic process | 1.4E-01 | 1.2E-02 | 1.8E-01 | 7.1E-02 | 4.0E-01 | 6.8E-01 | 3.8E-02 | 7.6E-01 | 2.2E-01 | 4.9E-02 | 4.0E-02 | 2.1E-01 |
| GO:0008073 | GO:Mole L4 | ornithine decarboxylase inhibitor activity                            | 2.5E-01 | 2.6E-01 | 1.4E-01 | 1.3E-01 | 1.4E-01 | 2.3E-01 | 4.9E-02 | 4.8E-01 | 1.5E-01 | 2.3E-01 | 4.0E-02 | 2.4E-01 |
| GO:0032990 | GO:Bio L4  | cell part morphogenesis                                               | 2.3E-01 | 1.3E-01 | 3.7E-02 | 5.6E-02 | 9.5E-02 | 2.0E-01 | 1.8E-01 | 5.6E-01 | 1.0E-01 | 1.2E-01 | 4.0E-02 | 1.4E-01 |
| GO:0040017 | GO:Bio L4  | positive regulation of locomotion                                     | 1.4E-01 | 2.3E-01 | 1.2E-01 | 8.3E-02 | 5.4E-02 | 2.1E-01 | 5.5E-02 | 2.9E-01 | 4.3E-02 | 2.0E-01 | 4.1E-02 | 1.2E-01 |
| GO:0071256 | GO:Cell L4 | translocon complex                                                    | 5.3E-01 | 7.3E-01 | 5.8E-01 | 6.4E-01 | 7.7E-02 | 2.5E-01 | 1.2E-02 | 7.3E-01 | 1.7E-01 | 4.9E-01 | 4.1E-02 | 8.2E-01 |
| GO:0007617 | GO:Bio L4  | mating behavior                                                       | 1.8E-01 | 5.1E-02 | 8.5E-03 | 1.4E-02 | 4.9E-01 | 9.5E-01 | 8.1E-01 | 9.9E-01 | 3.0E-01 | 2.0E-01 | 4.1E-02 | 7.5E-02 |
| GO:0009059 | GO:Bio L4  | macromolecule biosynthetic process                                    | 1.3E-01 | 1.2E-02 | 1.8E-01 | 1.1E-01 | 4.8E-01 | 6.6E-01 | 3.8E-02 | 8.6E-01 | 2.4E-01 | 4.8E-02 | 4.1E-02 | 3.2E-01 |
| GO:0008038 | GO:Bio L4  | neuron recognition                                                    | 5.6E-01 | 6.7E-01 | 9.2E-02 | 1.2E-01 | 2.8E-01 | 1.0E-01 | 7.5E-02 | 7.9E-01 | 4.4E-01 | 2.5E-01 | 4.1E-02 | 3.1E-01 |
| GO:0031082 | GO:Cell L4 | BLOC complex                                                          | 1.7E-01 | 4.4E-02 | 1.9E-02 | 8.5E-03 | 2.5E-01 | 9.7E-01 | 3.6E-01 | 8.9E-01 | 1.7E-01 | 1.8E-01 | 4.1E-02 | 4.5E-02 |
| GO:0002376 | GO:Bio L2  | immune system process                                                 | 6.1E-03 | 2.0E-03 | 1.1E-02 | 7.3E-03 | 4.6E-01 | 2.1E-01 | 6.8E-01 | 3.0E-01 | 1.9E-02 | 3.7E-03 | 4.2E-02 | 1.6E-02 |
| GO:0003824 | GO:Mole L2 | catalytic activity                                                    | 1.8E-01 | 1.9E-02 | 9.8E-02 | 1.7E-01 | 7.7E-01 | 1.8E-01 | 7.3E-02 | 5.4E-01 | 4.2E-01 | 2.2E-02 | 4.2E-02 | 3.1E-01 |
| GO:0007010 | GO:Bio L4  | cytoskeleton organization                                             | 8.9E-03 | 3.0E-02 | 6.5E-01 | 4.2E-01 | 1.9E-01 | 1.4E-02 | 1.1E-02 | 8.9E-01 | 1.3E-02 | 3.7E-03 | 4.3E-02 | 7.4E-01 |
| GO:0051953 | GO:Bio L4  | negative regulation of amine transport                                | 3.8E-01 | 3.2E-01 | 6.6E-02 | 1.4E-01 | 8.0E-03 | 4.3E-03 | 1.1E-01 | 2.1E-01 | 2.1E-02 | 1.1E-02 | 4.3E-02 | 1.4E-01 |
| GO:0048534 | GO:Bio L4  | hemopoietic or lymphoid organ development                             | 1.5E-01 | 6.1E-02 | 2.0E-02 | 1.7E-02 | 4.9E-01 | 3.1E-01 | 3.5E-01 | 4.2E-01 | 2.6E-01 | 9.3E-02 | 4.3E-02 | 4.2E-02 |
| GO:0030220 | GO:Bio L4  | platelet formation                                                    | 2.0E-03 | 9.0E-04 | 1.7E-02 | 2.1E-02 | 4.9E-01 | 2.6E-01 | 4.2E-01 | 3.2E-01 | 7.8E-03 | 2.2E-03 | 4.3E-02 | 4.1E-02 |
| GO:0010564 | GO:Bio L4  | regulation of cell cycle process                                      | 7.4E-01 | 3.6E-01 | 8.6E-01 | 7.7E-01 | 2.5E-01 | 1.0E-01 | 8.4E-03 | 7.1E-01 | 5.0E-01 | 1.6E-01 | 4.3E-02 | 8.8E-01 |
| GO:0003677 | GO:Mole L4 | DNA binding                                                           | 4.4E-02 | 1.3E-02 | 1.6E-01 | 4.4E-02 | 5.2E-02 | 1.5E-01 | 4.4E-02 | 8.8E-01 | 1.6E-02 | 1.4E-02 | 4.3E-02 | 1.6E-01 |
| GO:0008074 | GO:Cell L4 | guanylate cyclase complex, soluble                                    | 2.0E-01 | 2.9E-01 | 5.8E-01 | 5.1E-01 | 1.4E-01 | 1.2E-01 | 1.3E-02 | 5.4E-02 | 1.3E-01 | 1.5E-01 | 4.3E-02 | 1.3E-01 |
| GO:0090183 | GO:Bio L4  | regulation of kidney development                                      | 7.7E-01 | 7.1E-01 | 5.8E-01 | 6.3E-01 | 4.6E-02 | 3.4E-02 | 1.2E-02 | 2.6E-01 | 1.5E-01 | 1.1E-01 | 4.3E-02 | 4.6E-01 |
| GO:0090184 | GO:Bio L4  | positive regulation of kidney development                             | 7.7E-01 | 7.1E-01 | 5.8E-01 | 6.3E-01 | 4.6E-02 | 3.4E-02 | 1.2E-02 | 2.6E-01 | 1.5E-01 | 1.1E-01 | 4.3E-02 | 4.6E-01 |
| GO:0010467 | GO:Bio L4  | gene expression                                                       | 3.4E-01 | 6.1E-02 | 1.9E-01 | 1.1E-01 | 3.4E-01 | 6.1E-01 | 3.9E-02 | 8.8E-01 | 3.6E-01 | 1.6E-01 | 4.3E-02 | 3.2E-01 |
| GO:0032273 | GO:Bio L4  | positive regulation of protein polymerization                         | 5.0E-01 | 2.1E-01 | 3.9E-01 | 3.5E-01 | 7.3E-01 | 5.2E-01 | 1.9E-02 | 7.4E-01 | 7.3E-01 | 3.5E-01 | 4.3E-02 | 6.1E-01 |
| GO:0051172 | GO:Bio L4  | negative regulation of nitrogen compound metabolic process            | 1.7E-01 | 5.9E-02 | 2.4E-01 | 2.1E-01 | 4.6E-01 | 9.2E-01 | 3.0E-02 | 6.9E-01 | 2.8E-01 | 2.1E-01 | 4.3E-02 | 4.2E-01 |

|            |            |                                                             |         |         |         |         |         |         |         |         |         |         |         |         |
|------------|------------|-------------------------------------------------------------|---------|---------|---------|---------|---------|---------|---------|---------|---------|---------|---------|---------|
| GO:0045184 | GO:Bio L4  | establishment of protein localization                       | 6.2E-01 | 9.0E-02 | 1.4E-01 | 3.1E-02 | 3.7E-02 | 1.0E-01 | 5.1E-02 | 8.4E-01 | 1.1E-01 | 5.2E-02 | 4.3E-02 | 1.2E-01 |
| GO:0043197 | GO:Cell L4 | dendritic spine                                             | 3.0E-02 | 2.9E-03 | 6.0E-02 | 2.8E-02 | 6.4E-01 | 4.5E-01 | 1.2E-01 | 4.6E-01 | 9.5E-02 | 9.9E-03 | 4.3E-02 | 6.7E-02 |
| GO:0070167 | GO:Bio L4  | regulation of biomineral formation                          | 1.9E-01 | 3.3E-02 | 9.8E-01 | 9.6E-01 | 4.3E-01 | 2.5E-01 | 7.5E-03 | 5.1E-01 | 2.8E-01 | 4.7E-02 | 4.3E-02 | 8.3E-01 |
| GO:0048640 | GO:Bio L4  | negative regulation of developmental growth                 | 2.3E-01 | 1.4E-01 | 1.9E-02 | 3.2E-02 | 1.4E-01 | 3.3E-01 | 3.9E-01 | 7.8E-01 | 1.4E-01 | 1.9E-01 | 4.4E-02 | 1.2E-01 |
| GO:0006884 | GO:Bio L4  | cell volume homeostasis                                     | 3.7E-01 | 5.2E-01 | 5.9E-01 | 8.0E-01 | 1.2E-01 | 4.0E-01 | 1.3E-02 | 7.0E-01 | 1.9E-01 | 5.3E-01 | 4.4E-02 | 8.8E-01 |
| GO:0045056 | GO:Bio L4  | transcytosis                                                | 2.7E-01 | 2.3E-01 | 4.0E-02 | 7.3E-02 | 5.6E-01 | 8.5E-01 | 1.9E-01 | 5.7E-01 | 4.4E-01 | 5.2E-01 | 4.4E-02 | 1.7E-01 |
| GO:0005886 | GO:Cell L4 | plasma membrane                                             | 1.6E-01 | 1.3E-02 | 1.2E-01 | 5.6E-02 | 6.2E-01 | 3.4E-01 | 6.1E-02 | 1.1E-01 | 3.3E-01 | 2.9E-02 | 4.4E-02 | 3.8E-02 |
| GO:0009896 | GO:Bio L4  | positive regulation of catabolic process                    | 4.4E-02 | 9.7E-02 | 2.1E-01 | 2.4E-01 | 8.9E-01 | 3.9E-01 | 3.7E-02 | 5.3E-01 | 1.7E-01 | 1.6E-01 | 4.5E-02 | 3.9E-01 |
| GO:0051704 | GO:Bio L2  | multi-organism process                                      | 5.5E-01 | 3.6E-01 | 1.9E-02 | 1.1E-02 | 2.0E-01 | 7.0E-02 | 4.0E-01 | 5.8E-01 | 3.6E-01 | 1.2E-01 | 4.5E-02 | 3.8E-02 |
| GO:0044422 | GO:Cell L2 | organelle part                                              | 7.3E-01 | 2.1E-01 | 4.7E-01 | 2.0E-01 | 4.2E-01 | 6.9E-02 | 1.7E-02 | 5.2E-01 | 6.7E-01 | 7.5E-02 | 4.5E-02 | 3.4E-01 |
| GO:0008287 | GO:Cell L4 | protein serine/threonine phosphatase complex                | 8.2E-01 | 5.8E-01 | 9.9E-01 | 8.1E-01 | 7.1E-01 | 4.3E-01 | 7.9E-03 | 4.7E-01 | 9.0E-01 | 6.0E-01 | 4.6E-02 | 7.5E-01 |
| GO:0043324 | GO:Bio L4  | pigment metabolic process during developmental pigmentation | 4.6E-01 | 6.2E-01 | 1.6E-01 | 1.1E-01 | 5.8E-02 | 5.2E-01 | 4.8E-02 | 2.3E-01 | 1.2E-01 | 6.9E-01 | 4.6E-02 | 1.2E-01 |
| GO:0043474 | GO:Bio L4  | pigment metabolic process during pigmentation               | 4.6E-01 | 6.2E-01 | 1.6E-01 | 1.1E-01 | 5.8E-02 | 5.2E-01 | 4.8E-02 | 2.3E-01 | 1.2E-01 | 6.9E-01 | 4.6E-02 | 1.2E-01 |
| GO:0019538 | GO:Bio L4  | protein metabolic process                                   | 8.0E-01 | 3.2E-01 | 2.3E-01 | 2.0E-01 | 4.7E-01 | 3.2E-01 | 3.3E-02 | 5.2E-01 | 7.5E-01 | 3.3E-01 | 4.6E-02 | 3.4E-01 |
| GO:0031641 | GO:Bio L4  | regulation of myelination                                   | 1.8E-02 | 4.6E-02 | 8.3E-02 | 1.0E-01 | 9.3E-01 | 8.8E-01 | 9.5E-02 | 7.3E-01 | 8.5E-02 | 1.7E-01 | 4.6E-02 | 2.7E-01 |
|            | 3010 KEGG  | Ribosome                                                    | 6.1E-01 | 7.6E-01 | 8.8E-01 | 7.5E-01 | 5.8E-01 | 7.0E-01 | 8.9E-03 | 8.4E-01 | 7.2E-01 | 8.7E-01 | 4.6E-02 | 9.2E-01 |
| GO:0002238 | GO:Bio L4  | response to molecule of fungal origin                       | 5.3E-02 | 9.9E-03 | 3.8E-01 | 2.4E-01 | 2.2E-02 | 6.4E-02 | 2.1E-02 | 2.9E-01 | 8.9E-03 | 5.3E-03 | 4.7E-02 | 2.5E-01 |
| GO:0010033 | GO:Bio L4  | response to organic substance                               | 1.7E-01 | 1.4E-02 | 3.4E-01 | 2.2E-01 | 3.4E-01 | 1.7E-01 | 2.4E-02 | 6.1E-01 | 2.2E-01 | 1.7E-02 | 4.7E-02 | 4.1E-01 |
| GO:0046794 | GO:Bio L4  | virion transport                                            | 2.8E-01 | 2.8E-01 | 1.3E-02 | 2.1E-02 | 6.1E-01 | 1.5E-01 | 6.0E-01 | 7.2E-01 | 4.7E-01 | 1.8E-01 | 4.7E-02 | 7.8E-02 |
| GO:0045597 | GO:Bio L4  | positive regulation of cell differentiation                 | 2.5E-01 | 2.9E-01 | 2.8E-01 | 3.2E-01 | 4.6E-01 | 4.1E-01 | 2.9E-02 | 9.3E-01 | 3.7E-01 | 3.7E-01 | 4.7E-02 | 6.6E-01 |
| GO:0017119 | GO:Cell L4 | Golgi transport complex                                     | 9.0E-01 | 6.0E-01 | 1.0E-02 | 1.6E-02 | 5.9E-02 | 3.6E-02 | 8.1E-01 | 6.1E-01 | 2.1E-01 | 1.0E-01 | 4.7E-02 | 5.4E-02 |
| GO:0021794 | GO:Bio L4  | thalamus development                                        | 8.5E-01 | 8.7E-01 | 8.1E-01 | 7.6E-01 | 3.3E-01 | 6.5E-01 | 1.0E-02 | 9.4E-01 | 6.3E-01 | 8.9E-01 | 4.7E-02 | 9.5E-01 |
| GO:0046879 | GO:Bio L4  | hormone secretion                                           | 5.5E-02 | 5.3E-03 | 1.6E-01 | 3.0E-01 | 8.1E-02 | 6.0E-01 | 5.2E-02 | 8.0E-01 | 2.9E-02 | 2.1E-02 | 4.7E-02 | 5.8E-01 |
| GO:0001838 | GO:Bio L4  | embryonic epithelial tube formation                         | 1.6E-01 | 8.2E-02 | 1.6E-01 | 1.3E-01 | 3.6E-01 | 3.4E-03 | 5.0E-02 | 4.4E-01 | 2.2E-01 | 2.6E-03 | 4.7E-02 | 2.2E-01 |

|            |            |                                                             |         |         |         |         |         |         |         |         |         |         |         |         |
|------------|------------|-------------------------------------------------------------|---------|---------|---------|---------|---------|---------|---------|---------|---------|---------|---------|---------|
| GO:0045202 | GO:Cell L2 | synapse                                                     | 2.5E-01 | 2.1E-02 | 1.1E-01 | 6.6E-02 | 8.2E-01 | 6.2E-01 | 7.5E-02 | 3.7E-01 | 5.4E-01 | 6.9E-02 | 4.7E-02 | 1.2E-01 |
| GO:0033267 | GO:Cell L4 | axon part                                                   | 6.4E-02 | 3.2E-03 | 1.2E-01 | 7.8E-02 | 1.1E-01 | 1.1E-01 | 6.7E-02 | 3.0E-01 | 4.3E-02 | 3.2E-03 | 4.7E-02 | 1.1E-01 |
| GO:0008356 | GO:Bio L4  | asymmetric cell division                                    | 2.1E-01 | 5.5E-02 | 1.0E-02 | 3.4E-02 | 6.3E-01 | 6.6E-01 | 8.2E-01 | 2.1E-01 | 4.0E-01 | 1.6E-01 | 4.8E-02 | 4.2E-02 |
| GO:0031253 | GO:Cell L4 | cell projection membrane                                    | 7.6E-01 | 7.2E-01 | 4.7E-01 | 2.7E-01 | 8.0E-02 | 1.8E-01 | 1.7E-02 | 2.0E-01 | 2.3E-01 | 3.9E-01 | 4.8E-02 | 2.1E-01 |
| GO:0032838 | GO:Cell L4 | cell projection cytoplasm                                   | 8.7E-02 | 4.5E-01 | 5.0E-02 | 9.5E-02 | 3.4E-01 | 5.6E-01 | 1.6E-01 | 2.3E-02 | 1.3E-01 | 6.0E-01 | 4.8E-02 | 1.6E-02 |
| GO:0019888 | GO:Mole L4 | protein phosphatase regulator activity                      | 5.5E-01 | 3.0E-01 | 9.4E-01 | 9.0E-01 | 4.3E-01 | 1.4E-01 | 8.8E-03 | 8.2E-03 | 5.8E-01 | 1.7E-01 | 4.8E-02 | 4.4E-02 |
| 4614       | KEGG       | Renin-angiotensin system                                    | 4.4E-01 | 2.5E-01 | 3.6E-02 | 1.8E-02 | 9.0E-02 | 9.3E-02 | 2.3E-01 | 6.0E-01 | 1.7E-01 | 1.1E-01 | 4.8E-02 | 5.8E-02 |
| GO:0048754 | GO:Bio L4  | branching morphogenesis of a tube                           | 8.9E-01 | 9.1E-01 | 4.3E-01 | 3.6E-01 | 4.1E-02 | 1.5E-01 | 1.9E-02 | 1.9E-01 | 1.6E-01 | 4.1E-01 | 4.8E-02 | 2.6E-01 |
| GO:0008092 | GO:Mole L4 | cytoskeletal protein binding                                | 9.3E-03 | 1.1E-02 | 2.9E-01 | 2.6E-01 | 3.1E-01 | 2.5E-03 | 2.9E-02 | 9.3E-01 | 2.0E-02 | 3.1E-04 | 4.9E-02 | 5.8E-01 |
| GO:0031668 | GO:Bio L4  | cellular response to extracellular stimulus                 | 2.2E-01 | 4.0E-02 | 4.7E-01 | 2.6E-01 | 8.0E-01 | 3.4E-01 | 1.8E-02 | 6.4E-01 | 4.8E-01 | 7.2E-02 | 4.9E-02 | 4.7E-01 |
| GO:0071496 | GO:Bio L4  | cellular response to external stimulus                      | 2.2E-01 | 4.0E-02 | 4.7E-01 | 2.6E-01 | 8.0E-01 | 3.4E-01 | 1.8E-02 | 6.4E-01 | 4.8E-01 | 7.2E-02 | 4.9E-02 | 4.7E-01 |
| GO:0016614 | GO:Mole L4 | oxidoreductase activity, acting on CH-OH group of donors    | 1.5E-01 | 9.2E-02 | 8.2E-01 | 7.0E-01 | 2.4E-01 | 2.0E-01 | 1.0E-02 | 8.7E-01 | 1.5E-01 | 9.3E-02 | 4.9E-02 | 9.1E-01 |
| GO:0007618 | GO:Bio L4  | mating                                                      | 4.5E-01 | 1.7E-01 | 2.6E-02 | 3.4E-02 | 5.2E-02 | 1.1E-01 | 3.3E-01 | 8.5E-01 | 1.1E-01 | 9.2E-02 | 4.9E-02 | 1.3E-01 |
| GO:0010610 | GO:Bio L4  | regulation of mRNA stability involved in response to stress | 2.0E-01 | 2.0E-01 | 2.4E-02 | 1.0E-02 | 8.2E-01 | 2.5E-01 | 3.6E-01 | 9.6E-01 | 4.6E-01 | 2.0E-01 | 5.0E-02 | 5.5E-02 |
| 4510       | KEGG       | Focal adhesion                                              | 4.8E-01 | 3.5E-01 | 7.8E-01 | 7.0E-01 | 1.3E-01 | 1.6E-01 | 1.1E-02 | 3.8E-01 | 2.3E-01 | 2.2E-01 | 5.0E-02 | 6.2E-01 |
| GO:0019904 | GO:Mole L4 | protein domain specific binding                             | 8.6E-01 | 7.6E-01 | 1.1E-01 | 7.2E-02 | 7.4E-01 | 5.2E-02 | 8.2E-02 | 8.6E-01 | 9.2E-01 | 1.7E-01 | 5.1E-02 | 2.3E-01 |
| GO:0043576 | GO:Bio L4  | regulation of respiratory gaseous exchange                  | 4.9E-01 | 2.1E-01 | 1.6E-01 | 2.2E-01 | 2.6E-02 | 2.9E-01 | 5.7E-02 | 2.6E-01 | 6.8E-02 | 2.3E-01 | 5.1E-02 | 2.2E-01 |
| GO:0016247 | GO:Mole L2 | channel regulator activity                                  | 1.3E-01 | 1.4E-02 | 6.4E-02 | 6.6E-02 | 6.7E-01 | 5.3E-01 | 1.4E-01 | 1.7E-01 | 3.0E-01 | 4.4E-02 | 5.1E-02 | 6.3E-02 |
| 5200       | KEGG       | Pathways in cancer                                          | 9.5E-03 | 3.2E-02 | 3.4E-02 | 2.6E-01 | 4.6E-01 | 5.5E-01 | 2.6E-01 | 4.1E-01 | 2.8E-02 | 9.0E-02 | 5.1E-02 | 3.5E-01 |
| GO:0032528 | GO:Bio L4  | microvillus organization                                    | 2.1E-01 | 1.4E-01 | 4.6E-01 | 4.1E-01 | 5.9E-01 | 5.0E-01 | 2.0E-02 | 1.7E-01 | 3.8E-01 | 2.6E-01 | 5.1E-02 | 2.6E-01 |
| GO:0016566 | GO:Mole L4 | specific transcriptional repressor activity                 | 5.2E-01 | 3.5E-01 | 1.8E-02 | 3.5E-02 | 5.3E-01 | 4.7E-01 | 4.9E-01 | 4.9E-01 | 6.3E-01 | 4.6E-01 | 5.1E-02 | 8.5E-02 |
| GO:0008159 | GO:Mole L4 | positive transcription elongation factor activity           | 4.8E-01 | 4.1E-01 | 2.8E-01 | 5.4E-01 | 1.0E-01 | 6.1E-01 | 3.2E-02 | 7.8E-01 | 2.0E-01 | 6.0E-01 | 5.1E-02 | 7.8E-01 |



|            |            |                                                         |         |         |         |         |         |         |         |         |         |         |         |         |
|------------|------------|---------------------------------------------------------|---------|---------|---------|---------|---------|---------|---------|---------|---------|---------|---------|---------|
| GO:0044260 | GO:Bio L4  | cellular macromolecule metabolic process                | 3.1E-01 | 2.5E-02 | 1.6E-01 | 8.7E-02 | 4.6E-01 | 4.0E-01 | 5.9E-02 | 7.6E-01 | 4.2E-01 | 5.7E-02 | 5.2E-02 | 2.4E-01 |
| GO:0050904 | GO:Bio L4  | diapedesis                                              | 4.3E-01 | 1.9E-01 | 9.2E-03 | 9.9E-03 | 9.5E-01 | 7.9E-01 | 9.9E-01 | 7.7E-01 | 7.7E-01 | 4.3E-01 | 5.2E-02 | 4.5E-02 |
| GO:0007005 | GO:Bio L4  | mitochondrion organization                              | 9.3E-01 | 7.9E-01 | 6.0E-01 | 8.0E-01 | 1.1E-01 | 1.6E-03 | 1.6E-02 | 2.3E-01 | 3.3E-01 | 9.7E-03 | 5.3E-02 | 4.9E-01 |
| GO:0032991 | GO:Cell L2 | macromolecular complex                                  | 3.4E-01 | 3.2E-02 | 3.9E-01 | 1.7E-01 | 2.0E-01 | 1.5E-02 | 2.4E-02 | 2.5E-01 | 2.5E-01 | 4.2E-03 | 5.3E-02 | 1.8E-01 |
| GO:0045216 | GO:Bio L4  | cell-cell junction organization                         | 5.9E-01 | 4.2E-01 | 6.4E-01 | 7.3E-01 | 5.2E-01 | 4.6E-01 | 1.5E-02 | 8.8E-01 | 6.7E-01 | 5.1E-01 | 5.3E-02 | 9.3E-01 |
| GO:0035148 | GO:Bio L4  | tube formation                                          | 1.7E-01 | 8.7E-02 | 1.7E-01 | 1.4E-01 | 3.8E-01 | 3.6E-03 | 5.4E-02 | 4.6E-01 | 2.4E-01 | 2.8E-03 | 5.3E-02 | 2.4E-01 |
| GO:0040015 | GO:Bio L4  | negative regulation of multicellular organism growth    | 1.7E-01 | 2.5E-02 | 3.2E-02 | 8.9E-02 | 5.0E-01 | 4.1E-01 | 2.9E-01 | 1.4E-01 | 2.9E-01 | 5.7E-02 | 5.3E-02 | 6.7E-02 |
| GO:0007389 | GO:Bio L4  | pattern specification process                           | 6.4E-02 | 6.5E-02 | 1.1E-01 | 2.8E-01 | 4.7E-01 | 8.3E-01 | 8.8E-02 | 9.6E-01 | 1.4E-01 | 2.1E-01 | 5.3E-02 | 6.2E-01 |
| GO:0042978 | GO:Mole L4 | ornithine decarboxylase activator activity              | 5.2E-01 | 2.1E-01 | 1.3E-02 | 1.2E-02 | 2.4E-01 | 2.7E-01 | 7.3E-01 | 2.8E-01 | 3.8E-01 | 2.2E-01 | 5.4E-02 | 2.2E-02 |
| GO:0070937 | GO:Cell L4 | CRD-mediated mRNA stability complex                     | 2.0E-02 | 3.7E-02 | 1.5E-02 | 6.4E-03 | 3.1E-01 | 7.4E-01 | 6.2E-01 | 8.6E-01 | 3.7E-02 | 1.3E-01 | 5.4E-02 | 3.4E-02 |
| GO:0051241 | GO:Bio L4  | negative regulation of multicellular organismal process | 1.4E-01 | 1.2E-01 | 1.0E-01 | 2.0E-01 | 3.4E-01 | 4.2E-01 | 9.3E-02 | 6.1E-01 | 1.9E-01 | 2.1E-01 | 5.4E-02 | 3.8E-01 |
| GO:0060688 | GO:Bio L4  | regulation of morphogenesis of a branching structure    | 1.3E-01 | 2.9E-01 | 8.3E-01 | 7.9E-01 | 4.5E-02 | 3.2E-02 | 1.1E-02 | 2.8E-01 | 3.6E-02 | 5.2E-02 | 5.4E-02 | 5.5E-01 |
| GO:0005576 | GO:Cell L2 | extracellular region                                    | 9.1E-02 | 2.4E-02 | 1.1E-01 | 5.7E-02 | 3.4E-02 | 3.4E-02 | 8.8E-02 | 4.5E-01 | 2.1E-02 | 6.7E-03 | 5.4E-02 | 1.2E-01 |
| GO:0001968 | GO:Mole L4 | fibronectin binding                                     | 1.6E-01 | 3.9E-02 | 1.1E-02 | 3.7E-03 | 8.6E-01 | 9.5E-01 | 9.1E-01 | 2.0E-01 | 4.1E-01 | 1.6E-01 | 5.4E-02 | 6.1E-03 |
| GO:0016585 | GO:Cell L4 | chromatin remodeling complex                            | 3.3E-01 | 1.5E-01 | 1.8E-02 | 2.0E-02 | 7.0E-01 | 6.7E-01 | 5.3E-01 | 9.3E-01 | 5.7E-01 | 3.3E-01 | 5.4E-02 | 9.3E-02 |
| GO:0010941 | GO:Bio L4  | regulation of cell death                                | 9.7E-03 | 3.0E-04 | 4.4E-02 | 6.7E-03 | 3.4E-01 | 4.9E-01 | 2.2E-01 | 5.5E-01 | 2.2E-02 | 1.4E-03 | 5.5E-02 | 2.4E-02 |
| GO:0014741 | GO:Bio L4  | negative regulation of muscle hypertrophy               | 1.5E-01 | 3.0E-01 | 5.4E-02 | 1.6E-01 | 1.0E+00 | 9.8E-01 | 1.8E-01 | 6.3E-01 | 4.4E-01 | 6.6E-01 | 5.5E-02 | 3.3E-01 |
| GO:0031224 | GO:Cell L4 | intrinsic to membrane                                   | 6.0E-01 | 7.0E-02 | 2.6E-01 | 1.2E-01 | 6.7E-01 | 1.4E-01 | 3.8E-02 | 1.1E-01 | 7.7E-01 | 5.6E-02 | 5.5E-02 | 7.0E-02 |
| GO:0019062 | GO:Bio L4  | virion attachment to host cell surface receptor         | 7.1E-01 | 7.1E-01 | 1.1E-02 | 2.9E-02 | 9.0E-01 | 4.6E-01 | 8.8E-01 | 2.8E-01 | 9.2E-01 | 6.9E-01 | 5.5E-02 | 4.7E-02 |
| GO:0006979 | GO:Bio L4  | response to oxidative stress                            | 4.7E-01 | 5.0E-01 | 6.9E-02 | 9.9E-02 | 9.6E-01 | 9.2E-01 | 1.4E-01 | 3.9E-01 | 8.1E-01 | 8.2E-01 | 5.5E-02 | 1.7E-01 |
| GO:0040012 | GO:Bio L4  | regulation of locomotion                                | 3.2E-02 | 1.4E-02 | 2.7E-02 | 2.9E-02 | 1.5E-02 | 1.4E-01 | 3.7E-01 | 5.3E-01 | 4.0E-03 | 1.4E-02 | 5.5E-02 | 7.9E-02 |
| GO:0005839 | GO:Cell L4 | proteasome core complex                                 | 4.8E-01 | 2.7E-01 | 1.2E-01 | 1.4E-01 | 3.9E-01 | 2.8E-01 | 8.3E-02 | 8.9E-01 | 5.0E-01 | 2.7E-01 | 5.6E-02 | 3.9E-01 |

|            |            |                                                       |         |         |         |         |         |         |         |         |         |         |         |         |
|------------|------------|-------------------------------------------------------|---------|---------|---------|---------|---------|---------|---------|---------|---------|---------|---------|---------|
| GO:0031410 | GO:Cell L4 | cytoplasmic vesicle                                   | 8.7E-01 | 6.5E-01 | 2.6E-01 | 5.2E-02 | 4.2E-01 | 2.2E-01 | 3.8E-02 | 5.1E-01 | 7.3E-01 | 4.3E-01 | 5.6E-02 | 1.2E-01 |
| GO:0030036 | GO:Bio L4  | actin cytoskeleton organization                       | 6.8E-03 | 9.3E-03 | 4.1E-01 | 2.2E-01 | 8.3E-02 | 3.7E-03 | 2.5E-02 | 7.8E-01 | 4.8E-03 | 3.9E-04 | 5.7E-02 | 4.8E-01 |
| GO:0044446 | GO:Cell L4 | intracellular organelle part                          | 7.1E-01 | 2.0E-01 | 4.7E-01 | 2.1E-01 | 3.9E-01 | 6.3E-02 | 2.1E-02 | 5.3E-01 | 6.4E-01 | 6.9E-02 | 5.7E-02 | 3.6E-01 |
| 5219       | KEGG       | Bladder cancer                                        | 1.6E-01 | 4.1E-01 | 5.3E-02 | 9.9E-02 | 9.1E-01 | 2.1E-01 | 1.9E-01 | 1.7E-02 | 4.3E-01 | 3.0E-01 | 5.7E-02 | 1.2E-02 |
| GO:0070571 | GO:Bio L4  | negative regulation of neuron projection regeneration | 4.2E-01 | 2.9E-01 | 1.3E-01 | 2.1E-01 | 8.8E-01 | 3.8E-01 | 8.1E-02 | 5.4E-01 | 7.4E-01 | 3.5E-01 | 5.8E-02 | 3.6E-01 |
| GO:0000902 | GO:Bio L4  | cell morphogenesis                                    | 2.6E-01 | 2.5E-01 | 1.2E-01 | 1.1E-01 | 2.4E-01 | 3.1E-01 | 9.0E-02 | 5.9E-01 | 2.4E-01 | 2.7E-01 | 5.8E-02 | 2.4E-01 |
| 3050       | KEGG       | Proteasome                                            | 2.8E-01 | 2.8E-01 | 1.3E-01 | 4.1E-02 | 7.2E-01 | 4.7E-01 | 8.3E-02 | 9.2E-01 | 5.2E-01 | 4.0E-01 | 5.8E-02 | 1.6E-01 |
| GO:0019838 | GO:Mole L4 | growth factor binding                                 | 1.8E-01 | 1.9E-02 | 1.2E-01 | 2.0E-01 | 5.7E-01 | 9.9E-01 | 8.9E-02 | 4.4E-01 | 3.4E-01 | 9.2E-02 | 5.8E-02 | 3.0E-01 |
| GO:0014051 | GO:Bio L4  | gamma-aminobutyric acid secretion                     | 2.9E-01 | 8.9E-02 | 1.4E-02 | 9.0E-03 | 1.4E-01 | 4.8E-02 | 7.4E-01 | 6.2E-01 | 1.7E-01 | 2.7E-02 | 5.8E-02 | 3.4E-02 |
| GO:0060152 | GO:Bio L4  | microtubule-based peroxisome localization             | 2.7E-01 | 1.7E-01 | 4.4E-01 | 5.4E-01 | 2.9E-01 | 6.1E-01 | 2.4E-02 | 9.7E-01 | 2.8E-01 | 3.3E-01 | 5.9E-02 | 8.7E-01 |
| GO:0008021 | GO:Cell L4 | synaptic vesicle                                      | 6.7E-01 | 2.4E-01 | 6.4E-02 | 1.7E-02 | 7.2E-01 | 4.4E-01 | 1.7E-01 | 3.6E-01 | 8.3E-01 | 3.4E-01 | 5.9E-02 | 3.7E-02 |
| GO:0048499 | GO:Bio L4  | synaptic vesicle membrane organization                | 2.6E-01 | 2.0E-01 | 2.6E-02 | 1.9E-02 | 6.3E-01 | 2.6E-01 | 4.1E-01 | 5.8E-01 | 4.6E-01 | 2.1E-01 | 5.9E-02 | 6.0E-02 |
| GO:0030882 | GO:Mole L4 | lipid antigen binding                                 | 3.0E-01 | 1.8E-01 | 4.6E-02 | 4.9E-02 | 2.9E-01 | 3.7E-01 | 2.3E-01 | 4.3E-02 | 3.0E-01 | 2.5E-01 | 5.9E-02 | 1.5E-02 |
| GO:0060491 | GO:Bio L4  | regulation of cell projection assembly                | 8.0E-01 | 6.6E-01 | 9.3E-01 | 9.6E-01 | 3.4E-01 | 7.9E-01 | 1.2E-02 | 9.2E-01 | 6.2E-01 | 8.6E-01 | 5.9E-02 | 9.9E-01 |
| GO:0009279 | GO:Cell L4 | cell outer membrane                                   | 9.8E-01 | 7.2E-01 | 1.4E-01 | 2.1E-01 | 2.8E-01 | 5.2E-02 | 7.8E-02 | 7.9E-01 | 6.3E-01 | 1.6E-01 | 5.9E-02 | 4.7E-01 |
| GO:0031589 | GO:Bio L4  | cell-substrate adhesion                               | 4.6E-01 | 2.2E-01 | 8.6E-02 | 6.7E-02 | 4.2E-01 | 1.3E-01 | 1.2E-01 | 1.8E-02 | 5.1E-01 | 1.3E-01 | 6.0E-02 | 9.5E-03 |
| GO:0032879 | GO:Bio L4  | regulation of localization                            | 7.6E-02 | 5.0E-04 | 1.3E-01 | 1.1E-01 | 2.0E-02 | 2.7E-01 | 8.5E-02 | 5.0E-01 | 1.1E-02 | 1.3E-03 | 6.0E-02 | 2.2E-01 |
| GO:0016849 | GO:Mole L4 | phosphorus-oxygen lyase activity                      | 6.6E-01 | 4.2E-01 | 1.5E-01 | 1.7E-01 | 6.2E-01 | 5.1E-01 | 7.1E-02 | 6.5E-01 | 7.7E-01 | 5.4E-01 | 6.0E-02 | 3.6E-01 |
| GO:0030278 | GO:Bio L4  | regulation of ossification                            | 3.7E-01 | 1.1E-01 | 9.4E-01 | 9.0E-01 | 4.9E-01 | 5.6E-01 | 1.2E-02 | 4.6E-01 | 4.9E-01 | 2.4E-01 | 6.0E-02 | 7.8E-01 |
| GO:0048853 | GO:Bio L4  | forebrain morphogenesis                               | 8.7E-03 | 3.6E-03 | 2.5E-02 | 1.2E-02 | 6.2E-01 | 6.5E-01 | 4.4E-01 | 2.0E-01 | 3.4E-02 | 1.7E-02 | 6.0E-02 | 1.7E-02 |
| GO:0034644 | GO:Bio L4  | cellular response to UV                               | 2.5E-02 | 3.9E-02 | 3.5E-02 | 2.7E-02 | 2.7E-01 | 1.8E-01 | 3.1E-01 | 6.7E-01 | 4.0E-02 | 4.2E-02 | 6.0E-02 | 9.0E-02 |
| GO:0007050 | GO:Bio L4  | cell cycle arrest                                     | 6.8E-01 | 4.9E-01 | 4.5E-01 | 4.0E-01 | 8.2E-01 | 8.8E-01 | 2.4E-02 | 8.0E-02 | 8.8E-01 | 7.9E-01 | 6.0E-02 | 1.4E-01 |
| GO:0046692 | GO:Bio L4  | sperm competition                                     | 4.5E-01 | 3.2E-01 | 6.0E-02 | 1.0E-01 | 8.2E-01 | 3.6E-01 | 1.8E-01 | 6.2E-01 | 7.4E-01 | 3.6E-01 | 6.0E-02 | 2.4E-01 |
| 5010       | KEGG       | Alzheimer's disease                                   | 7.7E-01 | 5.3E-01 | 1.5E-01 | 1.6E-01 | 6.8E-01 | 3.2E-01 | 7.2E-02 | 6.0E-02 | 8.6E-01 | 4.7E-01 | 6.0E-02 | 5.3E-02 |
| GO:0009889 | GO:Bio L4  | regulation of biosynthetic process                    | 1.0E-01 | 3.9E-03 | 2.1E-01 | 9.9E-02 | 7.4E-02 | 4.7E-01 | 5.3E-02 | 8.0E-01 | 4.4E-02 | 1.3E-02 | 6.1E-02 | 2.8E-01 |
| GO:0006944 | GO:Bio L4  | cellular membrane fusion                              | 6.3E-01 | 1.7E-01 | 3.2E-02 | 9.3E-02 | 7.6E-01 | 3.4E-01 | 3.4E-01 | 3.3E-01 | 8.3E-01 | 2.2E-01 | 6.1E-02 | 1.4E-01 |

|            |            |                                                                        |         |         |         |         |         |         |         |         |         |         |         |         |
|------------|------------|------------------------------------------------------------------------|---------|---------|---------|---------|---------|---------|---------|---------|---------|---------|---------|---------|
| GO:0019212 | GO:Mole L4 | phosphatase inhibitor activity                                         | 3.8E-01 | 3.8E-01 | 7.3E-01 | 7.0E-01 | 2.0E-01 | 5.3E-02 | 1.5E-02 | 1.9E-03 | 2.7E-01 | 9.9E-02 | 6.2E-02 | 1.0E-02 |
| GO:0002027 | GO:Bio L4  | regulation of heart rate                                               | 6.3E-01 | 7.1E-01 | 5.0E-02 | 2.1E-01 | 6.8E-01 | 1.9E-01 | 2.3E-01 | 4.6E-01 | 7.9E-01 | 4.0E-01 | 6.2E-02 | 3.2E-01 |
| GO:0030308 | GO:Bio L4  | negative regulation of cell growth                                     | 5.9E-01 | 4.6E-01 | 3.3E-01 | 5.4E-01 | 4.3E-01 | 3.5E-01 | 3.5E-02 | 7.9E-01 | 6.0E-01 | 4.5E-01 | 6.2E-02 | 7.9E-01 |
| GO:0044437 | GO:Cell L4 | vacuolar part                                                          | 1.8E-01 | 4.0E-02 | 3.3E-01 | 2.8E-02 | 5.5E-01 | 3.2E-01 | 3.4E-02 | 3.0E-01 | 3.3E-01 | 6.8E-02 | 6.2E-02 | 4.8E-02 |
| GO:0010248 | GO:Bio L4  | establishment or maintenance of transmembrane electrochemical gradient | 3.0E-01 | 3.4E-01 | 5.3E-01 | 4.8E-01 | 1.4E-01 | 3.5E-01 | 2.1E-02 | 7.4E-01 | 1.7E-01 | 3.7E-01 | 6.2E-02 | 7.2E-01 |
| GO:0045165 | GO:Bio L4  | cell fate commitment                                                   | 9.2E-01 | 7.8E-01 | 1.2E-01 | 1.9E-01 | 6.9E-02 | 1.9E-01 | 9.6E-02 | 3.4E-01 | 2.4E-01 | 4.3E-01 | 6.2E-02 | 2.5E-01 |
| GO:0040007 | GO:Bio L2  | growth                                                                 | 5.9E-01 | 4.3E-01 | 3.5E-01 | 4.3E-01 | 2.2E-01 | 3.8E-01 | 3.2E-02 | 8.9E-01 | 3.9E-01 | 4.6E-01 | 6.2E-02 | 7.5E-01 |
| GO:0015197 | GO:Mole L4 | peptide transporter activity                                           | 4.4E-01 | 1.9E-01 | 1.0E-01 | 9.3E-02 | 8.4E-02 | 1.5E-01 | 1.1E-01 | 5.5E-01 | 1.6E-01 | 1.3E-01 | 6.2E-02 | 2.0E-01 |
| GO:0032059 | GO:Cell L4 | bleb                                                                   | 3.5E-01 | 4.0E-01 | 2.4E-02 | 5.8E-02 | 4.7E-01 | 4.5E-01 | 4.8E-01 | 7.2E-01 | 4.7E-01 | 4.9E-01 | 6.3E-02 | 1.7E-01 |
| GO:0031643 | GO:Bio L4  | positive regulation of myelination                                     | 1.5E-01 | 3.2E-01 | 6.2E-01 | 8.4E-01 | 7.8E-01 | 5.5E-01 | 1.9E-02 | 8.0E-01 | 3.7E-01 | 4.8E-01 | 6.3E-02 | 9.4E-01 |
| GO:0016879 | GO:Mole L4 | ligase activity, forming carbon-nitrogen bonds                         | 2.9E-02 | 1.3E-02 | 3.2E-02 | 1.1E-01 | 9.0E-01 | 4.3E-01 | 3.6E-01 | 4.3E-01 | 1.2E-01 | 3.5E-02 | 6.3E-02 | 1.9E-01 |
| GO:0042734 | GO:Cell L4 | presynaptic membrane                                                   | 3.2E-01 | 5.4E-01 | 2.3E-02 | 7.8E-03 | 1.4E-01 | 6.7E-01 | 5.0E-01 | 5.4E-01 | 1.8E-01 | 7.3E-01 | 6.4E-02 | 2.7E-02 |
| GO:0030011 | GO:Bio L4  | maintenance of cell polarity                                           | 4.1E-01 | 2.4E-01 | 1.8E-01 | 2.3E-01 | 1.3E-01 | 3.2E-01 | 6.3E-02 | 4.8E-01 | 2.1E-01 | 2.8E-01 | 6.4E-02 | 3.6E-01 |
| GO:0016043 | GO:Bio L2  | cellular component organization                                        | 2.7E-01 | 4.8E-02 | 3.3E-01 | 1.3E-01 | 2.0E-01 | 1.2E-02 | 3.6E-02 | 7.8E-01 | 2.2E-01 | 4.8E-03 | 6.4E-02 | 3.4E-01 |
| GO:0032880 | GO:Bio L4  | regulation of protein localization                                     | 1.3E-01 | 1.0E-01 | 4.8E-01 | 2.5E-01 | 3.8E-01 | 5.4E-01 | 2.4E-02 | 6.4E-01 | 2.0E-01 | 2.1E-01 | 6.4E-02 | 4.6E-01 |
| GO:0051380 | GO:Mole L4 | norepinephrine binding                                                 | 6.7E-02 | 1.3E-02 | 5.6E-02 | 1.2E-01 | 6.5E-01 | 2.1E-01 | 2.1E-01 | 1.4E-01 | 1.8E-01 | 1.9E-02 | 6.4E-02 | 8.7E-02 |
| GO:0031646 | GO:Bio L4  | positive regulation of neurological system process                     | 1.6E-02 | 6.2E-03 | 1.0E-01 | 1.2E-01 | 2.3E-01 | 9.4E-02 | 1.2E-01 | 6.3E-01 | 2.4E-02 | 4.9E-03 | 6.4E-02 | 2.7E-01 |
| GO:0060044 | GO:Bio L4  | negative regulation of cardiac muscle cell proliferation               | 5.2E-03 | 2.7E-02 | 5.8E-01 | 4.7E-01 | 3.5E-02 | 1.3E-01 | 2.1E-02 | 3.5E-01 | 1.7E-03 | 2.3E-02 | 6.5E-02 | 4.6E-01 |
| GO:0004016 | GO:Mole L4 | adenylate cyclase activity                                             | 7.6E-01 | 2.8E-01 | 7.4E-02 | 1.2E-01 | 8.5E-01 | 9.6E-01 | 1.6E-01 | 9.1E-01 | 9.3E-01 | 6.2E-01 | 6.5E-02 | 3.5E-01 |
| GO:0002832 | GO:Bio L4  | negative regulation of response to biotic stimulus                     | 1.6E-01 | 1.3E-02 | 1.2E-02 | 3.7E-02 | 6.8E-01 | 9.2E-01 | 9.8E-01 | 9.6E-01 | 3.5E-01 | 6.6E-02 | 6.6E-02 | 1.5E-01 |
| GO:0050687 | GO:Bio L4  | negative regulation of defense response to virus                       | 1.6E-01 | 1.3E-02 | 1.2E-02 | 3.7E-02 | 6.8E-01 | 9.2E-01 | 9.8E-01 | 9.6E-01 | 3.5E-01 | 6.6E-02 | 6.6E-02 | 1.5E-01 |

|             |            |                                                                               |         |         |         |         |         |         |         |         |         |         |         |         |
|-------------|------------|-------------------------------------------------------------------------------|---------|---------|---------|---------|---------|---------|---------|---------|---------|---------|---------|---------|
| GO:0030048  | GO:Bio L4  | actin filament-based movement                                                 | 9.7E-03 | 4.8E-03 | 9.3E-02 | 1.3E-01 | 4.4E-01 | 5.3E-01 | 1.3E-01 | 2.7E-01 | 2.7E-02 | 1.8E-02 | 6.6E-02 | 1.5E-01 |
| PA165111376 | PharmGKB   | pgkb_pwy_Benzodiazepine pathway_PD                                            | 6.5E-01 | 6.4E-01 | 1.9E-01 | 2.2E-01 | 4.3E-01 | 5.2E-01 | 6.3E-02 | 3.9E-01 | 6.4E-01 | 6.9E-01 | 6.6E-02 | 2.9E-01 |
| GO:0006818  | GO:Bio L4  | hydrogen transport                                                            | 7.6E-01 | 6.5E-01 | 3.2E-01 | 6.9E-02 | 3.8E-01 | 4.4E-01 | 3.8E-02 | 2.3E-01 | 6.5E-01 | 6.5E-01 | 6.6E-02 | 8.1E-02 |
| GO:0033043  | GO:Bio L4  | regulation of organelle organization                                          | 2.2E-01 | 3.9E-02 | 4.6E-01 | 3.4E-01 | 4.2E-03 | 9.0E-04 | 2.6E-02 | 7.6E-01 | 7.5E-03 | 4.0E-04 | 6.6E-02 | 6.1E-01 |
| GO:0003704  | GO:Mole L4 | specific RNA polymerase II transcription factor activity                      | 2.7E-01 | 2.0E-01 | 3.1E-01 | 4.1E-01 | 9.0E-02 | 1.7E-01 | 4.0E-02 | 6.3E-01 | 1.1E-01 | 1.5E-01 | 6.6E-02 | 6.1E-01 |
| GO:0034708  | GO:Cell L4 | methyltransferase complex                                                     | 7.3E-01 | 1.4E-01 | 2.2E-01 | 7.7E-02 | 5.1E-01 | 6.6E-01 | 5.7E-02 | 2.6E-01 | 7.3E-01 | 3.2E-01 | 6.6E-02 | 9.9E-02 |
| GO:0007565  | GO:Bio L4  | female pregnancy                                                              | 5.4E-01 | 7.5E-01 | 2.7E-02 | 5.5E-02 | 9.7E-01 | 4.6E-01 | 4.5E-01 | 1.6E-01 | 8.6E-01 | 7.1E-01 | 6.7E-02 | 5.1E-02 |
| GO:0048598  | GO:Bio L4  | embryonic morphogenesis                                                       | 2.1E-01 | 3.2E-01 | 1.1E-01 | 2.2E-01 | 6.9E-02 | 9.2E-02 | 1.1E-01 | 7.9E-01 | 7.6E-02 | 1.3E-01 | 6.7E-02 | 4.8E-01 |
| GO:0045185  | GO:Bio L4  | maintenance of protein location                                               | 3.1E-01 | 3.0E-01 | 3.2E-01 | 3.4E-01 | 5.5E-01 | 1.9E-01 | 3.9E-02 | 6.2E-01 | 4.8E-01 | 2.2E-01 | 6.7E-02 | 5.4E-01 |
| GO:0030426  | GO:Cell L4 | growth cone                                                                   | 2.0E-01 | 2.5E-01 | 1.3E-01 | 3.3E-02 | 7.1E-02 | 1.2E-01 | 9.2E-02 | 5.7E-01 | 7.6E-02 | 1.4E-01 | 6.7E-02 | 9.3E-02 |
| GO:0001568  | GO:Bio L4  | blood vessel development                                                      | 1.4E-01 | 1.0E-01 | 2.3E-02 | 1.7E-02 | 7.0E-01 | 2.9E-01 | 5.5E-01 | 5.9E-01 | 3.2E-01 | 1.4E-01 | 6.7E-02 | 5.5E-02 |
| GO:0032403  | GO:Mole L4 | protein complex binding                                                       | 6.1E-02 | 2.9E-03 | 2.9E-02 | 3.9E-02 | 2.6E-01 | 4.2E-01 | 4.4E-01 | 9.0E-02 | 8.2E-02 | 9.3E-03 | 6.8E-02 | 2.3E-02 |
| GO:0030894  | GO:Cell L4 | replisome                                                                     | 6.5E-01 | 4.9E-01 | 3.1E-01 | 3.3E-01 | 6.1E-01 | 3.2E-01 | 4.1E-02 | 5.5E-01 | 7.7E-01 | 4.4E-01 | 6.8E-02 | 4.9E-01 |
| GO:0061025  | GO:Bio L4  | membrane fusion                                                               | 6.5E-01 | 1.8E-01 | 3.5E-02 | 1.0E-01 | 7.8E-01 | 3.5E-01 | 3.6E-01 | 3.4E-01 | 8.5E-01 | 2.4E-01 | 6.8E-02 | 1.5E-01 |
| GO:0008154  | GO:Bio L4  | actin polymerization or depolymerization                                      | 1.7E-01 | 9.7E-02 | 9.6E-02 | 8.1E-02 | 9.6E-02 | 6.9E-03 | 1.3E-01 | 9.7E-01 | 8.4E-02 | 5.6E-03 | 6.9E-02 | 2.8E-01 |
| GO:0009914  | GO:Bio L4  | hormone transport                                                             | 7.5E-02 | 8.2E-03 | 1.9E-01 | 3.5E-01 | 1.0E-01 | 6.6E-01 | 6.8E-02 | 8.3E-01 | 4.5E-02 | 3.4E-02 | 7.0E-02 | 6.5E-01 |
| GO:0048069  | GO:Bio L4  | eye pigmentation                                                              | 5.1E-01 | 6.7E-01 | 2.0E-01 | 1.4E-01 | 7.7E-02 | 6.1E-01 | 6.5E-02 | 2.8E-01 | 1.7E-01 | 7.8E-01 | 7.0E-02 | 1.6E-01 |
| GO:0002249  | GO:Bio L4  | lymphocyte anergy                                                             | 5.9E-02 | 1.1E-01 | 4.5E-02 | 1.4E-01 | 9.0E-01 | 8.8E-01 | 2.9E-01 | 3.6E-02 | 2.1E-01 | 3.2E-01 | 7.0E-02 | 3.1E-02 |
| GO:0019076  | GO:Bio L4  | release of virus from host                                                    | 3.4E-01 | 6.7E-01 | 4.9E-01 | 3.7E-01 | 7.5E-01 | 9.6E-01 | 2.7E-02 | 5.1E-01 | 6.0E-01 | 9.3E-01 | 7.0E-02 | 5.0E-01 |
| GO:0050858  | GO:Bio L4  | negative regulation of antigen receptor-mediated signaling pathway            | 8.5E-02 | 1.0E-01 | 2.5E-02 | 6.8E-02 | 1.1E-01 | 2.2E-01 | 5.2E-01 | 5.9E-02 | 5.4E-02 | 1.1E-01 | 7.0E-02 | 2.6E-02 |
| GO:0003002  | GO:Bio L4  | regionalization                                                               | 9.3E-02 | 1.1E-01 | 2.2E-01 | 5.7E-01 | 8.0E-01 | 9.4E-01 | 6.0E-02 | 9.6E-01 | 2.7E-01 | 3.5E-01 | 7.0E-02 | 8.8E-01 |
| GO:0030021  | GO:Mole L4 | extracellular matrix structural constituent conferring compression resistance | 5.3E-01 | 9.9E-01 | 8.2E-01 | 7.1E-01 | 2.8E-01 | 3.4E-01 | 1.6E-02 | 2.8E-01 | 4.3E-01 | 7.0E-01 | 7.0E-02 | 5.2E-01 |
| GO:0009994  | GO:Bio L4  | oocyte differentiation                                                        | 4.4E-01 | 9.3E-02 | 1.6E-01 | 1.2E-01 | 5.8E-01 | 3.3E-01 | 8.0E-02 | 5.0E-02 | 6.0E-01 | 1.4E-01 | 7.0E-02 | 3.7E-02 |
| GO:0002133  | GO:Cell L4 | polycystin complex                                                            | 7.3E-01 | 7.4E-01 | 3.3E-01 | 4.1E-01 | 3.6E-01 | 4.1E-02 | 4.0E-02 | 2.6E-01 | 6.1E-01 | 1.4E-01 | 7.0E-02 | 3.5E-01 |

|            |            |                                                        |         |         |         |         |         |         |         |         |         |         |         |         |
|------------|------------|--------------------------------------------------------|---------|---------|---------|---------|---------|---------|---------|---------|---------|---------|---------|---------|
| GO:0022891 | GO:Mole L4 | substrate-specific transmembrane transporter activity  | 2.3E-01 | 1.6E-01 | 5.1E-01 | 2.8E-01 | 6.2E-01 | 6.9E-02 | 2.6E-02 | 4.4E-01 | 4.3E-01 | 6.0E-02 | 7.1E-02 | 3.9E-01 |
| GO:0045110 | GO:Bio L4  | intermediate filament bundle assembly                  | 1.6E-01 | 5.7E-01 | 5.6E-01 | 4.7E-01 | 1.8E-01 | 3.0E-01 | 2.4E-02 | 2.3E-01 | 1.3E-01 | 4.7E-01 | 7.2E-02 | 3.4E-01 |
| GO:0001955 | GO:Bio L4  | blood vessel maturation                                | 9.3E-01 | 8.4E-01 | 2.6E-02 | 2.8E-02 | 3.2E-01 | 8.5E-01 | 5.1E-01 | 2.2E-01 | 6.6E-01 | 9.5E-01 | 7.2E-02 | 3.7E-02 |
| GO:0018993 | GO:Bio L4  | somatic sex determination                              | 1.0E+00 | 9.8E-01 | 6.2E-02 | 8.4E-02 | 9.5E-01 | 4.9E-01 | 2.2E-01 | 4.0E-01 | 1.0E+00 | 8.3E-01 | 7.2E-02 | 1.5E-01 |
| GO:0019835 | GO:Bio L4  | cytolysis                                              | 2.8E-01 | 1.4E-01 | 4.1E-01 | 4.4E-01 | 5.4E-01 | 7.5E-01 | 3.3E-02 | 8.1E-01 | 4.3E-01 | 3.4E-01 | 7.2E-02 | 7.3E-01 |
| 4120       | KEGG       | Ubiquitin mediated proteolysis                         | 1.8E-01 | 1.3E-01 | 2.7E-02 | 1.4E-01 | 7.3E-01 | 6.8E-01 | 5.0E-01 | 3.9E-01 | 3.9E-01 | 3.0E-01 | 7.2E-02 | 2.1E-01 |
| GO:0030900 | GO:Bio L4  | forebrain development                                  | 1.8E-01 | 4.3E-02 | 1.3E-01 | 4.9E-02 | 1.3E-01 | 4.3E-01 | 1.1E-01 | 9.4E-01 | 1.1E-01 | 9.3E-02 | 7.2E-02 | 1.9E-01 |
| GO:0005774 | GO:Cell L4 | vacuolar membrane                                      | 1.9E-01 | 5.2E-02 | 2.7E-01 | 2.1E-02 | 5.0E-01 | 2.6E-01 | 5.0E-02 | 3.4E-01 | 3.2E-01 | 7.3E-02 | 7.2E-02 | 4.2E-02 |
| GO:0007281 | GO:Bio L4  | germ cell development                                  | 7.3E-01 | 2.0E-01 | 6.2E-02 | 9.5E-02 | 9.8E-01 | 5.7E-01 | 2.2E-01 | 3.6E-01 | 9.5E-01 | 3.6E-01 | 7.3E-02 | 1.5E-01 |
| GO:0016504 | GO:Mole L4 | peptidase activator activity                           | 1.2E-01 | 3.0E-02 | 3.1E-02 | 3.7E-02 | 1.9E-01 | 4.0E-01 | 4.4E-01 | 6.9E-01 | 1.0E-01 | 6.6E-02 | 7.3E-02 | 1.2E-01 |
| GO:0006935 | GO:Bio L4  | chemotaxis                                             | 3.0E-02 | 7.1E-02 | 5.8E-02 | 1.1E-02 | 1.3E-01 | 6.3E-02 | 2.4E-01 | 2.1E-01 | 2.6E-02 | 2.9E-02 | 7.3E-02 | 1.6E-02 |
| GO:0042330 | GO:Bio L4  | taxis                                                  | 3.0E-02 | 7.1E-02 | 5.8E-02 | 1.1E-02 | 1.3E-01 | 6.3E-02 | 2.4E-01 | 2.1E-01 | 2.6E-02 | 2.9E-02 | 7.3E-02 | 1.6E-02 |
| GO:0046782 | GO:Bio L4  | regulation of viral transcription                      | 1.4E-01 | 1.7E-01 | 3.1E-01 | 6.1E-01 | 4.1E-01 | 1.7E-01 | 4.6E-02 | 1.0E-01 | 2.3E-01 | 1.3E-01 | 7.3E-02 | 2.4E-01 |
| GO:0002024 | GO:Bio L4  | diet induced thermogenesis                             | 6.6E-02 | 1.3E-02 | 4.6E-02 | 1.1E-01 | 4.2E-02 | 3.0E-01 | 3.0E-01 | 2.1E-01 | 1.9E-02 | 2.6E-02 | 7.4E-02 | 1.1E-01 |
| GO:0021846 | GO:Bio L4  | cell proliferation in forebrain                        | 9.0E-01 | 3.8E-01 | 7.0E-02 | 2.7E-02 | 7.8E-01 | 7.8E-01 | 2.0E-01 | 5.0E-01 | 9.5E-01 | 6.5E-01 | 7.4E-02 | 7.2E-02 |
| 4260       | KEGG       | Cardiac muscle contraction                             | 1.8E-01 | 1.5E-01 | 2.3E-02 | 1.6E-02 | 6.1E-01 | 2.2E-01 | 6.0E-01 | 1.2E-01 | 3.5E-01 | 1.5E-01 | 7.4E-02 | 1.4E-02 |
| GO:0048859 | GO:Bio L4  | formation of anatomical boundary                       | 6.5E-01 | 7.2E-01 | 4.9E-02 | 9.4E-02 | 4.3E-01 | 5.4E-01 | 2.9E-01 | 9.6E-01 | 6.3E-01 | 7.6E-01 | 7.4E-02 | 3.1E-01 |
| GO:0003001 | GO:Bio L4  | generation of a signal involved in cell-cell signaling | 1.7E-01 | 1.2E-02 | 1.5E-01 | 2.4E-01 | 3.6E-02 | 1.8E-01 | 9.2E-02 | 8.6E-01 | 3.7E-02 | 1.6E-02 | 7.4E-02 | 5.3E-01 |
| GO:0030427 | GO:Cell L4 | site of polarized growth                               | 2.1E-01 | 2.4E-01 | 1.4E-01 | 3.5E-02 | 6.7E-02 | 1.3E-01 | 9.8E-02 | 5.9E-01 | 7.5E-02 | 1.4E-01 | 7.4E-02 | 1.0E-01 |
| GO:0003103 | GO:Bio L4  | positive regulation of diuresis                        | 1.9E-01 | 2.9E-01 | 9.5E-02 | 2.6E-02 | 8.1E-01 | 6.9E-01 | 1.5E-01 | 9.1E-01 | 4.4E-01 | 5.2E-01 | 7.5E-02 | 1.1E-01 |
| GO:0017147 | GO:Mole L4 | Wnt-protein binding                                    | 2.2E-01 | 4.2E-02 | 2.9E-02 | 4.9E-02 | 2.8E-01 | 1.7E-01 | 4.9E-01 | 1.9E-01 | 2.3E-01 | 4.3E-02 | 7.5E-02 | 5.2E-02 |
| GO:0032886 | GO:Bio L4  | regulation of microtubule-based process                | 4.1E-01 | 2.6E-01 | 5.6E-01 | 5.1E-01 | 4.6E-01 | 3.9E-01 | 2.6E-02 | 7.8E-01 | 5.0E-01 | 3.3E-01 | 7.5E-02 | 7.6E-01 |
| GO:0032797 | GO:Cell L4 | SMN complex                                            | 6.9E-02 | 2.5E-01 | 5.7E-02 | 1.0E-02 | 1.1E-01 | 1.3E-01 | 2.6E-01 | 4.8E-01 | 4.6E-02 | 1.4E-01 | 7.6E-02 | 3.1E-02 |
| GO:0031344 | GO:Bio L4  | regulation of cell projection organization             | 3.2E-01 | 8.4E-02 | 5.6E-01 | 5.3E-01 | 1.6E-01 | 8.8E-01 | 2.6E-02 | 9.8E-01 | 2.1E-01 | 2.7E-01 | 7.6E-02 | 8.6E-01 |
| GO:0051775 | GO:Bio L4  | response to redox state                                | 9.9E-02 | 8.6E-02 | 2.1E-01 | 1.6E-01 | 2.8E-01 | 4.3E-01 | 7.0E-02 | 7.3E-01 | 1.3E-01 | 1.6E-01 | 7.6E-02 | 3.7E-01 |

|            |            |                                                                 |         |         |         |         |         |         |         |         |         |         |         |         |
|------------|------------|-----------------------------------------------------------------|---------|---------|---------|---------|---------|---------|---------|---------|---------|---------|---------|---------|
| GO:0032989 | GO:Bio L4  | cellular component morphogenesis                                | 2.5E-01 | 2.8E-01 | 1.3E-01 | 1.4E-01 | 2.4E-01 | 1.9E-01 | 1.2E-01 | 6.2E-01 | 2.3E-01 | 2.1E-01 | 7.6E-02 | 2.9E-01 |
| GO:0031095 | GO:Cell L4 | platelet dense tubular network membrane                         | 3.1E-01 | 5.6E-01 | 7.0E-01 | 6.1E-01 | 8.6E-01 | 8.7E-01 | 2.1E-02 | 2.7E-01 | 6.2E-01 | 8.3E-01 | 7.7E-02 | 4.7E-01 |
| GO:0030529 | GO:Cell L4 | ribonucleoprotein complex                                       | 6.1E-01 | 3.8E-01 | 1.1E-01 | 2.0E-01 | 5.3E-01 | 6.0E-01 | 1.3E-01 | 3.1E-01 | 6.9E-01 | 5.7E-01 | 7.7E-02 | 2.4E-01 |
| GO:0019226 | GO:Bio L4  | transmission of nerve impulse                                   | 1.9E-01 | 6.3E-03 | 5.9E-02 | 3.0E-02 | 5.9E-01 | 3.3E-01 | 2.5E-01 | 1.4E-01 | 3.5E-01 | 1.5E-02 | 7.7E-02 | 2.7E-02 |
| 4810       | KEGG       | Regulation of actin cytoskeleton                                | 6.1E-01 | 3.5E-01 | 3.3E-01 | 3.7E-01 | 7.0E-02 | 1.6E-01 | 4.5E-02 | 2.9E-01 | 1.8E-01 | 2.2E-01 | 7.7E-02 | 3.5E-01 |
| GO:0005215 | GO:Mole L2 | transporter activity                                            | 3.2E-01 | 5.4E-02 | 4.1E-01 | 1.0E-01 | 5.7E-01 | 9.6E-02 | 3.6E-02 | 2.9E-01 | 5.0E-01 | 3.2E-02 | 7.7E-02 | 1.3E-01 |
| GO:0007308 | GO:Bio L4  | oocyte construction                                             | 9.5E-01 | 9.9E-01 | 5.4E-01 | 5.5E-01 | 5.7E-01 | 6.9E-01 | 2.7E-02 | 3.9E-02 | 8.7E-01 | 9.4E-01 | 7.7E-02 | 1.0E-01 |
| GO:0007309 | GO:Bio L4  | oocyte axis specification                                       | 9.5E-01 | 9.9E-01 | 5.4E-01 | 5.5E-01 | 5.7E-01 | 6.9E-01 | 2.7E-02 | 3.9E-02 | 8.7E-01 | 9.4E-01 | 7.7E-02 | 1.0E-01 |
| GO:0006949 | GO:Bio L4  | syncytium formation                                             | 2.3E-01 | 2.7E-01 | 1.0E-01 | 2.2E-01 | 8.5E-02 | 4.1E-01 | 1.5E-01 | 2.2E-01 | 9.8E-02 | 3.6E-01 | 7.8E-02 | 1.9E-01 |
| 5110       | KEGG       | Vibrio cholerae infection                                       | 6.7E-01 | 7.9E-01 | 3.1E-01 | 4.7E-01 | 5.0E-01 | 4.8E-01 | 4.8E-02 | 6.8E-01 | 7.0E-01 | 7.4E-01 | 7.8E-02 | 6.8E-01 |
| GO:0070633 | GO:Bio L4  | transepithelial transport                                       | 3.2E-01 | 2.8E-01 | 1.7E-01 | 1.8E-01 | 6.2E-01 | 8.4E-01 | 8.9E-02 | 8.5E-01 | 5.2E-01 | 5.8E-01 | 7.8E-02 | 4.4E-01 |
| GO:0065003 | GO:Bio L4  | macromolecular complex assembly                                 | 5.0E-01 | 3.2E-01 | 4.4E-01 | 1.1E-01 | 1.2E-02 | 3.4E-03 | 3.4E-02 | 6.8E-01 | 3.7E-02 | 8.5E-03 | 7.8E-02 | 2.6E-01 |
| GO:0046849 | GO:Bio L4  | bone remodeling                                                 | 1.0E-01 | 1.9E-02 | 2.5E-01 | 2.7E-01 | 1.6E-01 | 5.0E-01 | 6.1E-02 | 6.2E-01 | 8.3E-02 | 5.4E-02 | 7.9E-02 | 4.6E-01 |
| GO:0009787 | GO:Bio L4  | regulation of abscisic acid mediated signaling pathway          | 4.2E-02 | 2.2E-01 | 4.9E-02 | 2.5E-01 | 6.5E-01 | 6.7E-01 | 3.1E-01 | 2.4E-01 | 1.3E-01 | 4.2E-01 | 7.9E-02 | 2.3E-01 |
| GO:0009789 | GO:Bio L4  | positive regulation of abscisic acid mediated signaling pathway | 4.2E-02 | 2.2E-01 | 4.9E-02 | 2.5E-01 | 6.5E-01 | 6.7E-01 | 3.1E-01 | 2.4E-01 | 1.3E-01 | 4.2E-01 | 7.9E-02 | 2.3E-01 |
| GO:0044057 | GO:Bio L4  | regulation of system process                                    | 2.2E-01 | 2.0E-02 | 1.9E-01 | 2.5E-01 | 1.4E-01 | 2.4E-01 | 8.2E-02 | 7.3E-01 | 1.4E-01 | 3.0E-02 | 7.9E-02 | 5.0E-01 |
| GO:0000149 | GO:Mole L4 | SNARE binding                                                   | 7.6E-01 | 4.2E-01 | 2.5E-02 | 9.7E-03 | 7.2E-01 | 7.5E-01 | 6.2E-01 | 3.7E-01 | 8.8E-01 | 6.8E-01 | 7.9E-02 | 2.4E-02 |
| GO:0010648 | GO:Bio L4  | negative regulation of cell communication                       | 3.2E-01 | 7.9E-02 | 2.6E-01 | 2.0E-01 | 1.1E-01 | 1.4E-01 | 6.0E-02 | 7.3E-01 | 1.5E-01 | 6.0E-02 | 8.0E-02 | 4.3E-01 |
| GO:0023057 | GO:Bio L4  | negative regulation of signaling process                        | 4.1E-01 | 7.8E-02 | 3.8E-01 | 2.6E-01 | 2.0E-01 | 2.1E-01 | 4.2E-02 | 6.8E-01 | 2.9E-01 | 8.3E-02 | 8.1E-02 | 4.8E-01 |
| GO:0030008 | GO:Cell L4 | TRAPP complex                                                   | 8.9E-01 | 8.2E-01 | 5.4E-01 | 7.5E-01 | 5.9E-01 | 1.3E-01 | 2.9E-02 | 5.6E-02 | 8.6E-01 | 3.5E-01 | 8.1E-02 | 1.7E-01 |
| GO:0015002 | GO:Mole L4 | heme-copper terminal oxidase activity                           | 7.0E-01 | 5.2E-01 | 1.1E-01 | 8.8E-02 | 4.8E-01 | 5.3E-01 | 1.4E-01 | 6.2E-01 | 7.0E-01 | 6.3E-01 | 8.1E-02 | 2.1E-01 |
| GO:0016675 | GO:Mole L4 | oxidoreductase activity, acting on heme group of donors         | 7.0E-01 | 5.2E-01 | 1.1E-01 | 8.8E-02 | 4.8E-01 | 5.3E-01 | 1.4E-01 | 6.2E-01 | 7.0E-01 | 6.3E-01 | 8.1E-02 | 2.1E-01 |
| GO:0016998 | GO:Bio L4  | cell wall macromolecule catabolic process                       | 4.1E-01 | 7.0E-01 | 1.2E-01 | 3.2E-01 | 1.1E-01 | 7.1E-01 | 1.3E-01 | 8.9E-01 | 1.8E-01 | 8.5E-01 | 8.1E-02 | 6.4E-01 |

|            |            |                                                                   |         |         |         |         |         |         |         |         |         |         |         |         |
|------------|------------|-------------------------------------------------------------------|---------|---------|---------|---------|---------|---------|---------|---------|---------|---------|---------|---------|
| GO:0040030 | GO:Bio L4  | regulation of molecular function, epigenetic                      | 1.2E-01 | 2.2E-01 | 4.5E-01 | 4.3E-01 | 2.0E-01 | 5.3E-01 | 3.5E-02 | 7.5E-01 | 1.1E-01 | 3.7E-01 | 8.1E-02 | 6.9E-01 |
| GO:0070887 | GO:Bio L4  | cellular response to chemical stimulus                            | 4.4E-01 | 1.0E-01 | 2.9E-01 | 1.4E-01 | 6.9E-02 | 2.9E-02 | 5.5E-02 | 7.1E-01 | 1.3E-01 | 2.0E-02 | 8.1E-02 | 3.2E-01 |
| GO:0050809 | GO:Mole L4 | diazepam binding                                                  | 1.9E-01 | 2.9E-01 | 9.3E-02 | 1.3E-01 | 3.1E-01 | 4.4E-01 | 1.7E-01 | 1.9E-01 | 2.3E-01 | 3.9E-01 | 8.1E-02 | 1.1E-01 |
| GO:0046136 | GO:Bio L4  | positive regulation of vitamin metabolic process                  | 5.2E-03 | 1.4E-02 | 3.8E-02 | 3.4E-02 | 9.3E-01 | 5.9E-01 | 4.2E-01 | 1.1E-01 | 3.1E-02 | 4.8E-02 | 8.2E-02 | 2.5E-02 |
| GO:0032891 | GO:Bio L4  | negative regulation of organic acid transport                     | 9.0E-02 | 4.5E-02 | 1.0E-01 | 8.4E-02 | 4.7E-02 | 4.9E-02 | 1.6E-01 | 3.6E-01 | 2.7E-02 | 1.6E-02 | 8.2E-02 | 1.4E-01 |
| GO:0010494 | GO:Cell L4 | stress granule                                                    | 6.4E-01 | 5.1E-01 | 2.1E-02 | 2.4E-02 | 1.8E-01 | 4.2E-01 | 7.7E-01 | 5.1E-01 | 3.6E-01 | 5.5E-01 | 8.2E-02 | 6.6E-02 |
| GO:0044283 | GO:Bio L4  | small molecule biosynthetic process                               | 4.8E-02 | 2.9E-03 | 6.7E-02 | 5.6E-02 | 6.6E-02 | 4.6E-01 | 2.4E-01 | 2.4E-01 | 2.1E-02 | 1.0E-02 | 8.3E-02 | 7.1E-02 |
| GO:0048382 | GO:Bio L4  | mesendoderm development                                           | 7.1E-01 | 7.4E-01 | 3.8E-02 | 1.1E-01 | 3.1E-01 | 2.4E-01 | 4.3E-01 | 9.2E-01 | 5.5E-01 | 4.8E-01 | 8.3E-02 | 3.3E-01 |
| GO:0034622 | GO:Bio L4  | cellular macromolecular complex assembly                          | 4.9E-01 | 3.6E-01 | 2.2E-01 | 1.3E-01 | 1.5E-02 | 1.7E-02 | 7.3E-02 | 9.2E-01 | 4.3E-02 | 3.7E-02 | 8.4E-02 | 3.7E-01 |
| GO:0001763 | GO:Bio L4  | morphogenesis of a branching structure                            | 8.8E-01 | 9.4E-01 | 4.8E-01 | 3.7E-01 | 3.8E-02 | 1.9E-01 | 3.4E-02 | 2.6E-01 | 1.5E-01 | 4.8E-01 | 8.4E-02 | 3.2E-01 |
| GO:0070169 | GO:Bio L4  | positive regulation of biomineral formation                       | 9.7E-02 | 1.5E-02 | 8.7E-01 | 7.8E-01 | 5.3E-01 | 4.6E-01 | 1.9E-02 | 5.2E-01 | 2.0E-01 | 4.0E-02 | 8.4E-02 | 7.7E-01 |
| GO:0000307 | GO:Cell L4 | cyclin-dependent protein kinase holoenzyme complex                | 8.0E-01 | 4.4E-01 | 2.2E-02 | 4.6E-02 | 2.1E-01 | 6.0E-01 | 7.7E-01 | 3.5E-01 | 4.7E-01 | 6.1E-01 | 8.5E-02 | 8.3E-02 |
| GO:0000835 | GO:Cell L4 | ER ubiquitin ligase complex                                       | 2.9E-01 | 8.3E-01 | 7.1E-01 | 8.1E-01 | 1.0E-01 | 7.1E-02 | 2.4E-02 | 1.1E-01 | 1.3E-01 | 2.3E-01 | 8.5E-02 | 3.0E-01 |
| GO:0040008 | GO:Bio L4  | regulation of growth                                              | 2.7E-01 | 3.6E-01 | 5.1E-01 | 7.8E-01 | 3.5E-01 | 2.8E-01 | 3.3E-02 | 7.1E-01 | 3.2E-01 | 3.3E-01 | 8.6E-02 | 8.8E-01 |
| 4630       | KEGG       | Jak-STAT signaling pathway                                        | 7.1E-02 | 1.9E-01 | 3.1E-02 | 5.7E-02 | 7.4E-01 | 9.1E-01 | 5.5E-01 | 5.9E-02 | 2.1E-01 | 4.7E-01 | 8.6E-02 | 2.2E-02 |
| GO:0051222 | GO:Bio L4  | positive regulation of protein transport                          | 3.7E-02 | 3.9E-02 | 3.1E-01 | 1.4E-01 | 1.3E-01 | 4.3E-01 | 5.5E-02 | 8.1E-01 | 3.0E-02 | 8.6E-02 | 8.7E-02 | 3.6E-01 |
| GO:0000768 | GO:Bio L4  | syncytium formation by plasma membrane fusion                     | 2.1E-01 | 2.4E-01 | 9.3E-02 | 2.0E-01 | 7.7E-02 | 4.3E-01 | 1.9E-01 | 2.0E-01 | 8.3E-02 | 3.4E-01 | 8.7E-02 | 1.7E-01 |
| GO:0010948 | GO:Bio L4  | negative regulation of cell cycle process                         | 8.0E-01 | 8.2E-01 | 6.1E-01 | 4.9E-01 | 1.9E-01 | 2.0E-01 | 2.9E-02 | 6.2E-01 | 4.4E-01 | 4.6E-01 | 8.8E-02 | 6.7E-01 |
| GO:0005057 | GO:Mole L4 | receptor signaling protein activity                               | 1.3E-01 | 1.6E-01 | 1.5E-01 | 3.9E-01 | 7.0E-01 | 7.7E-02 | 1.2E-01 | 4.6E-01 | 3.0E-01 | 6.6E-02 | 8.8E-02 | 4.9E-01 |
| GO:0003705 | GO:Mole L4 | RNA polymerase II transcription factor activity, enhancer binding | 3.0E-01 | 6.2E-01 | 4.7E-02 | 6.8E-02 | 9.0E-01 | 6.1E-01 | 3.7E-01 | 7.3E-01 | 6.2E-01 | 7.5E-01 | 8.8E-02 | 2.0E-01 |
| GO:0005903 | GO:Cell L4 | brush border                                                      | 1.9E-01 | 9.5E-02 | 1.6E-01 | 7.8E-02 | 4.9E-01 | 6.7E-01 | 1.1E-01 | 1.8E-01 | 3.1E-01 | 2.4E-01 | 8.8E-02 | 7.3E-02 |

|            |            |                                                                                               |         |         |         |         |         |         |         |         |         |         |         |         |
|------------|------------|-----------------------------------------------------------------------------------------------|---------|---------|---------|---------|---------|---------|---------|---------|---------|---------|---------|---------|
| GO:0050906 | GO:Bio L4  | detection of stimulus involved in sensory perception                                          | 5.2E-01 | 4.6E-01 | 5.5E-01 | 7.4E-01 | 9.6E-01 | 9.6E-01 | 3.2E-02 | 4.8E-01 | 8.5E-01 | 8.0E-01 | 8.8E-02 | 7.2E-01 |
| GO:0033588 | GO:Cell L4 | Elongator holoenzyme complex                                                                  | 7.5E-01 | 6.6E-01 | 3.6E-01 | 3.2E-01 | 8.6E-01 | 6.7E-01 | 4.9E-02 | 2.9E-02 | 9.3E-01 | 8.0E-01 | 8.8E-02 | 5.2E-02 |
| GO:0044433 | GO:Cell L4 | cytoplasmic vesicle part                                                                      | 8.2E-01 | 9.6E-01 | 5.5E-01 | 4.6E-01 | 3.3E-01 | 3.9E-01 | 3.2E-02 | 3.6E-01 | 6.3E-01 | 7.4E-01 | 8.8E-02 | 4.7E-01 |
| GO:0031974 | GO:Cell L2 | membrane-enclosed lumen                                                                       | 3.1E-01 | 2.1E-01 | 1.2E-01 | 2.7E-02 | 8.2E-01 | 7.9E-01 | 1.5E-01 | 6.2E-01 | 6.0E-01 | 4.7E-01 | 8.8E-02 | 8.5E-02 |
| GO:0000139 | GO:Cell L4 | Golgi membrane                                                                                | 4.0E-01 | 6.5E-02 | 2.4E-01 | 3.7E-01 | 6.4E-01 | 6.0E-01 | 7.4E-02 | 2.5E-01 | 6.1E-01 | 1.6E-01 | 8.9E-02 | 3.1E-01 |
| GO:0060323 | GO:Bio L4  | head morphogenesis                                                                            | 1.9E-01 | 4.0E-01 | 9.5E-02 | 9.9E-02 | 8.4E-01 | 8.5E-01 | 1.8E-01 | 5.1E-01 | 4.6E-01 | 7.1E-01 | 8.9E-02 | 2.0E-01 |
| GO:0050434 | GO:Bio L4  | positive regulation of viral transcription                                                    | 7.8E-02 | 8.8E-02 | 8.5E-01 | 7.5E-01 | 4.0E-01 | 9.2E-02 | 2.1E-02 | 6.6E-02 | 1.4E-01 | 4.7E-02 | 8.9E-02 | 2.0E-01 |
| GO:0005198 | GO:Mole L2 | structural molecule activity                                                                  | 2.8E-01 | 2.6E-01 | 4.9E-01 | 2.9E-01 | 6.7E-01 | 7.3E-01 | 3.6E-02 | 9.0E-01 | 5.1E-01 | 5.1E-01 | 8.9E-02 | 6.1E-01 |
| GO:0009368 | GO:Cell L4 | endopeptidase Clp complex                                                                     | 2.9E-01 | 2.1E-01 | 3.9E-01 | 4.6E-01 | 8.7E-02 | 4.8E-02 | 4.6E-02 | 5.3E-01 | 1.2E-01 | 5.6E-02 | 9.0E-02 | 5.9E-01 |
| GO:0031175 | GO:Bio L4  | neuron projection development                                                                 | 3.5E-01 | 1.2E-01 | 1.0E-01 | 8.3E-02 | 2.0E-01 | 4.1E-01 | 1.8E-01 | 5.7E-01 | 2.6E-01 | 2.0E-01 | 9.0E-02 | 1.9E-01 |
| GO:0043233 | GO:Cell L4 | organelle lumen                                                                               | 3.2E-01 | 2.7E-01 | 1.2E-01 | 3.5E-02 | 8.1E-01 | 7.6E-01 | 1.5E-01 | 5.9E-01 | 6.0E-01 | 5.3E-01 | 9.0E-02 | 1.0E-01 |
| 100        | KEGG       | Steroid biosynthesis                                                                          | 6.6E-01 | 7.8E-01 | 6.2E-01 | 6.5E-01 | 7.1E-01 | 3.8E-01 | 2.9E-02 | 6.2E-01 | 8.2E-01 | 6.5E-01 | 9.0E-02 | 7.7E-01 |
| GO:0043242 | GO:Bio L4  | negative regulation of protein complex disassembly                                            | 1.9E-01 | 6.7E-02 | 5.7E-01 | 3.7E-01 | 9.9E-02 | 9.2E-03 | 3.2E-02 | 6.9E-01 | 9.4E-02 | 5.1E-03 | 9.0E-02 | 6.0E-01 |
| GO:0016860 | GO:Mole L4 | intramolecular oxidoreductase activity                                                        | 7.2E-01 | 5.2E-01 | 3.1E-01 | 2.1E-01 | 6.3E-01 | 8.4E-01 | 5.8E-02 | 2.1E-01 | 8.1E-01 | 8.0E-01 | 9.1E-02 | 1.8E-01 |
| 4146       | KEGG       | Peroxisome                                                                                    | 7.1E-01 | 4.0E-01 | 4.1E-01 | 2.2E-01 | 1.2E-01 | 1.6E-02 | 4.5E-02 | 2.4E-01 | 2.9E-01 | 3.9E-02 | 9.2E-02 | 2.1E-01 |
| 5213       | KEGG       | Endometrial cancer                                                                            | 4.0E-01 | 6.6E-01 | 8.5E-01 | 8.8E-01 | 4.3E-01 | 3.9E-01 | 2.2E-02 | 4.2E-02 | 4.7E-01 | 6.1E-01 | 9.3E-02 | 1.6E-01 |
| GO:0007290 | GO:Bio L4  | spermatid nucleus elongation                                                                  | 1.1E-01 | 8.6E-02 | 6.5E-01 | 6.5E-01 | 3.0E-01 | 2.2E-01 | 2.9E-02 | 1.8E-01 | 1.5E-01 | 9.3E-02 | 9.3E-02 | 3.7E-01 |
| GO:0070424 | GO:Bio L4  | regulation of nucleotide-binding oligomerization domain containing signaling pathway          | 2.6E-01 | 2.2E-01 | 5.4E-02 | 7.7E-02 | 6.8E-02 | 1.8E-01 | 3.5E-01 | 1.0E-01 | 8.8E-02 | 1.6E-01 | 9.3E-02 | 4.6E-02 |
| GO:0070426 | GO:Bio L4  | positive regulation of nucleotide-binding oligomerization domain containing signaling pathway | 2.6E-01 | 2.2E-01 | 5.4E-02 | 7.7E-02 | 6.8E-02 | 1.8E-01 | 3.5E-01 | 1.0E-01 | 8.8E-02 | 1.6E-01 | 9.3E-02 | 4.6E-02 |
| 4062       | KEGG       | Chemokine signaling pathway                                                                   | 3.4E-02 | 5.5E-02 | 4.2E-01 | 3.0E-01 | 2.1E-01 | 6.8E-02 | 4.4E-02 | 5.0E-01 | 4.2E-02 | 2.5E-02 | 9.3E-02 | 4.4E-01 |
| GO:0043236 | GO:Mole L4 | laminin binding                                                                               | 5.2E-01 | 6.1E-01 | 3.5E-01 | 1.4E-01 | 6.9E-01 | 7.1E-01 | 5.4E-02 | 3.7E-01 | 7.2E-01 | 8.0E-01 | 9.3E-02 | 2.0E-01 |
| GO:0043366 | GO:Bio L4  | beta selection                                                                                | 5.6E-01 | 3.8E-01 | 3.9E-01 | 3.5E-01 | 5.6E-01 | 2.4E-01 | 4.8E-02 | 9.3E-01 | 6.8E-01 | 3.1E-01 | 9.4E-02 | 6.9E-01 |



|            |            |                                                                   |         |         |         |         |         |         |         |         |         |         |         |         |
|------------|------------|-------------------------------------------------------------------|---------|---------|---------|---------|---------|---------|---------|---------|---------|---------|---------|---------|
| GO:0030027 | GO:Cell L4 | lamellipodium                                                     | 6.2E-01 | 5.8E-01 | 7.0E-01 | 3.8E-01 | 5.3E-01 | 7.9E-02 | 2.7E-02 | 7.7E-01 | 6.9E-01 | 1.9E-01 | 9.4E-02 | 6.5E-01 |
| GO:0043901 | GO:Bio L4  | negative regulation of multi-organism process                     | 2.4E-01 | 2.1E-02 | 1.9E-02 | 3.8E-02 | 8.1E-01 | 9.8E-01 | 1.0E+00 | 9.6E-01 | 5.1E-01 | 1.0E-01 | 9.4E-02 | 1.6E-01 |
| GO:0010469 | GO:Bio L4  | regulation of receptor activity                                   | 4.4E-01 | 4.5E-01 | 2.4E-01 | 5.9E-01 | 3.3E-01 | 1.1E-01 | 8.1E-02 | 7.1E-01 | 4.2E-01 | 1.9E-01 | 9.4E-02 | 7.9E-01 |
| GO:0044455 | GO:Cell L4 | mitochondrial membrane part                                       | 9.2E-01 | 6.7E-01 | 6.3E-01 | 6.4E-01 | 6.7E-01 | 4.2E-01 | 3.0E-02 | 1.8E-01 | 9.1E-01 | 6.4E-01 | 9.4E-02 | 3.6E-01 |
| GO:0043560 | GO:Mole L4 | insulin receptor substrate binding                                | 1.3E-01 | 1.6E-01 | 8.4E-02 | 3.9E-02 | 4.7E-01 | 7.7E-01 | 2.3E-01 | 6.9E-01 | 2.3E-01 | 3.8E-01 | 9.4E-02 | 1.2E-01 |
| GO:0019080 | GO:Bio L4  | viral genome expression                                           | 1.7E-01 | 2.0E-01 | 3.5E-01 | 6.7E-01 | 4.6E-01 | 2.0E-01 | 5.5E-02 | 1.2E-01 | 2.8E-01 | 1.7E-01 | 9.5E-02 | 2.9E-01 |
| 5120       | KEGG       | Epithelial cell signaling in Helicobacter pylori infection        | 8.3E-01 | 9.7E-01 | 9.8E-01 | 8.4E-01 | 3.6E-01 | 3.3E-01 | 2.0E-02 | 6.6E-01 | 6.6E-01 | 6.9E-01 | 9.5E-02 | 8.8E-01 |
| GO:0072093 | GO:Bio L4  | metanephric renal vesicle formation                               | 7.2E-01 | 3.5E-01 | 5.8E-02 | 5.5E-02 | 7.4E-02 | 6.1E-02 | 3.3E-01 | 5.1E-01 | 2.1E-01 | 1.0E-01 | 9.5E-02 | 1.3E-01 |
| GO:0000086 | GO:Bio L4  | G2/M transition of mitotic cell cycle                             | 8.4E-02 | 3.4E-01 | 4.6E-02 | 6.6E-02 | 4.0E-01 | 5.9E-01 | 4.2E-01 | 1.7E-01 | 1.5E-01 | 5.2E-01 | 9.5E-02 | 6.2E-02 |
| GO:0071554 | GO:Bio L2  | cell wall organization or biogenesis                              | 4.4E-01 | 7.3E-01 | 1.3E-01 | 3.5E-01 | 1.2E-01 | 7.4E-01 | 1.5E-01 | 8.3E-01 | 2.1E-01 | 8.8E-01 | 9.5E-02 | 6.4E-01 |
| GO:0044036 | GO:Bio L4  | cell wall macromolecule metabolic process                         | 4.4E-01 | 7.3E-01 | 1.3E-01 | 3.5E-01 | 1.2E-01 | 7.4E-01 | 1.5E-01 | 8.3E-01 | 2.1E-01 | 8.8E-01 | 9.5E-02 | 6.4E-01 |
| GO:0021915 | GO:Bio L4  | neural tube development                                           | 1.2E-01 | 6.5E-02 | 1.4E-01 | 7.2E-02 | 2.8E-01 | 7.4E-03 | 1.3E-01 | 4.9E-01 | 1.5E-01 | 4.2E-03 | 9.5E-02 | 1.5E-01 |
| GO:0043169 | GO:Mole L4 | cation binding                                                    | 3.4E-01 | 2.1E-02 | 3.8E-01 | 1.2E-01 | 2.1E-01 | 2.2E-01 | 5.1E-02 | 2.5E-01 | 2.6E-01 | 2.9E-02 | 9.5E-02 | 1.3E-01 |
| GO:0014850 | GO:Bio L4  | response to muscle activity                                       | 1.1E-01 | 2.1E-01 | 2.4E-02 | 8.9E-02 | 8.8E-01 | 8.8E-01 | 8.3E-01 | 5.4E-01 | 3.3E-01 | 5.0E-01 | 9.6E-02 | 1.9E-01 |
| GO:0060325 | GO:Bio L4  | face morphogenesis                                                | 1.5E-01 | 3.3E-01 | 7.2E-02 | 7.4E-02 | 7.7E-01 | 7.7E-01 | 2.7E-01 | 4.3E-01 | 3.6E-01 | 6.0E-01 | 9.6E-02 | 1.4E-01 |
| GO:0034621 | GO:Bio L4  | cellular macromolecular complex subunit organization              | 5.9E-01 | 4.5E-01 | 3.0E-01 | 2.0E-01 | 1.1E-02 | 6.9E-03 | 6.4E-02 | 9.7E-01 | 4.0E-02 | 2.1E-02 | 9.6E-02 | 5.1E-01 |
| GO:0048840 | GO:Bio L4  | otolith development                                               | 6.7E-02 | 1.8E-01 | 1.5E-01 | 2.3E-01 | 3.7E-01 | 4.8E-01 | 1.3E-01 | 1.1E-01 | 1.2E-01 | 3.0E-01 | 9.7E-02 | 1.1E-01 |
| GO:0044252 | GO:Bio L4  | negative regulation of multicellular organismal metabolic process | 2.4E-01 | 1.1E-01 | 1.1E-01 | 8.8E-02 | 4.3E-01 | 5.1E-01 | 1.9E-01 | 1.5E-01 | 3.4E-01 | 2.2E-01 | 9.7E-02 | 7.1E-02 |
| GO:0031965 | GO:Cell L4 | nuclear membrane                                                  | 1.3E-01 | 1.8E-01 | 1.9E-01 | 1.9E-01 | 5.8E-01 | 5.0E-01 | 1.0E-01 | 3.0E-01 | 2.8E-01 | 3.1E-01 | 9.7E-02 | 2.2E-01 |
| 5217       | KEGG       | Basal cell carcinoma                                              | 3.9E-01 | 2.4E-01 | 1.7E-01 | 1.6E-01 | 7.2E-02 | 3.3E-01 | 1.2E-01 | 9.3E-01 | 1.3E-01 | 2.8E-01 | 9.7E-02 | 4.3E-01 |
| GO:0042995 | GO:Cell L4 | cell projection                                                   | 1.3E-01 | 3.7E-03 | 1.8E-01 | 2.1E-02 | 6.2E-01 | 3.8E-01 | 1.1E-01 | 6.3E-01 | 2.8E-01 | 1.1E-02 | 9.8E-02 | 7.1E-02 |

|            |            |                                                                     |         |         |         |         |         |         |         |         |         |         |         |         |
|------------|------------|---------------------------------------------------------------------|---------|---------|---------|---------|---------|---------|---------|---------|---------|---------|---------|---------|
| GO:0021869 | GO:Bio L4  | forebrain ventricular zone progenitor cell division                 | 7.0E-01 | 1.6E-01 | 1.0E-01 | 3.5E-02 | 3.0E-01 | 3.1E-01 | 2.0E-01 | 7.4E-01 | 5.4E-01 | 1.9E-01 | 9.8E-02 | 1.2E-01 |
| GO:0005849 | GO:Cell L4 | mRNA cleavage factor complex                                        | 5.4E-01 | 8.7E-01 | 3.5E-01 | 2.3E-01 | 8.9E-01 | 9.5E-01 | 5.8E-02 | 5.4E-02 | 8.4E-01 | 9.8E-01 | 9.8E-02 | 6.6E-02 |
| 680        | KEGG       | Methane metabolism                                                  | 6.8E-01 | 4.4E-01 | 1.4E-01 | 7.8E-02 | 1.3E-01 | 2.1E-01 | 1.5E-01 | 9.5E-01 | 3.0E-01 | 3.1E-01 | 9.8E-02 | 2.7E-01 |
| GO:0042596 | GO:Bio L4  | fear response                                                       | 4.5E-02 | 8.2E-02 | 3.0E-02 | 8.9E-02 | 1.3E-01 | 3.3E-01 | 6.7E-01 | 8.7E-01 | 3.6E-02 | 1.3E-01 | 9.9E-02 | 2.8E-01 |
| GO:0009057 | GO:Bio L4  | macromolecule catabolic process                                     | 3.2E-01 | 2.0E-01 | 4.3E-01 | 2.0E-01 | 2.5E-01 | 1.1E-01 | 4.8E-02 | 3.5E-01 | 2.8E-01 | 1.1E-01 | 9.9E-02 | 2.6E-01 |
| GO:0052173 | GO:Bio L4  | response to defenses of other organism during symbiotic interaction | 5.0E-02 | 1.7E-02 | 4.1E-01 | 3.2E-01 | 2.9E-01 | 4.7E-01 | 5.0E-02 | 1.3E-01 | 7.7E-02 | 4.7E-02 | 9.9E-02 | 1.8E-01 |
| GO:0075136 | GO:Bio L4  | response to host                                                    | 5.0E-02 | 1.7E-02 | 4.1E-01 | 3.2E-01 | 2.9E-01 | 4.7E-01 | 5.0E-02 | 1.3E-01 | 7.7E-02 | 4.7E-02 | 9.9E-02 | 1.8E-01 |
| GO:0001550 | GO:Bio L4  | ovarian cumulus expansion                                           | 9.7E-01 | 9.0E-01 | 7.2E-01 | 3.1E-01 | 1.4E-01 | 1.2E-01 | 2.8E-02 | 3.5E-01 | 4.0E-01 | 3.6E-01 | 9.9E-02 | 3.5E-01 |
| GO:0022605 | GO:Bio L4  | oogenesis stage                                                     | 9.7E-01 | 9.0E-01 | 7.2E-01 | 3.1E-01 | 1.4E-01 | 1.2E-01 | 2.8E-02 | 3.5E-01 | 4.0E-01 | 3.6E-01 | 9.9E-02 | 3.5E-01 |
| GO:0009893 | GO:Bio L4  | positive regulation of metabolic process                            | 2.3E-01 | 1.4E-01 | 2.6E-01 | 2.8E-01 | 3.2E-01 | 3.0E-01 | 7.7E-02 | 5.2E-01 | 2.7E-01 | 1.7E-01 | 1.0E-01 | 4.2E-01 |
| GO:0033605 | GO:Bio L4  | positive regulation of catecholamine secretion                      | 2.9E-01 | 1.9E-01 | 1.8E-01 | 2.7E-01 | 6.2E-01 | 9.8E-01 | 1.2E-01 | 9.8E-01 | 4.9E-01 | 5.1E-01 | 1.0E-01 | 6.1E-01 |
| GO:0010604 | GO:Bio L4  | positive regulation of macromolecule metabolic process              | 2.1E-01 | 1.4E-01 | 3.0E-01 | 2.8E-01 | 3.3E-01 | 2.5E-01 | 6.9E-02 | 6.9E-01 | 2.5E-01 | 1.5E-01 | 1.0E-01 | 5.1E-01 |
| GO:0021985 | GO:Bio L4  | neurohypophysis development                                         | 7.1E-01 | 1.5E-01 | 1.0E-01 | 3.4E-02 | 2.0E-01 | 6.2E-01 | 2.0E-01 | 7.4E-01 | 4.2E-01 | 3.2E-01 | 1.0E-01 | 1.2E-01 |
| GO:0000900 | GO:Mole L4 | translation repressor activity, nucleic acid binding                | 4.6E-01 | 4.9E-01 | 5.6E-02 | 8.2E-02 | 1.8E-01 | 6.6E-01 | 3.7E-01 | 4.1E-01 | 2.9E-01 | 6.8E-01 | 1.0E-01 | 1.5E-01 |
| GO:0050808 | GO:Bio L4  | synapse organization                                                | 1.4E-01 | 1.4E-01 | 1.1E-01 | 1.1E-01 | 7.0E-01 | 5.8E-01 | 1.8E-01 | 3.2E-01 | 3.2E-01 | 2.8E-01 | 1.0E-01 | 1.5E-01 |
| GO:0044085 | GO:Bio L2  | cellular component biogenesis                                       | 5.4E-01 | 2.1E-01 | 2.6E-01 | 1.0E-01 | 1.4E-02 | 1.6E-02 | 7.8E-02 | 7.0E-01 | 4.4E-02 | 2.3E-02 | 1.0E-01 | 2.6E-01 |
| GO:0048610 | GO:Bio L4  | reproductive cellular process                                       | 7.7E-01 | 3.6E-01 | 1.0E-01 | 1.0E-01 | 9.9E-01 | 4.5E-01 | 2.1E-01 | 1.2E-01 | 9.7E-01 | 4.6E-01 | 1.0E-01 | 6.8E-02 |
| GO:0003700 | GO:Mole L4 | transcription factor activity                                       | 4.4E-03 | 3.0E-04 | 1.2E-01 | 7.1E-02 | 5.0E-01 | 2.2E-01 | 1.7E-01 | 9.1E-01 | 1.6E-02 | 7.1E-04 | 1.0E-01 | 2.4E-01 |
| GO:0043012 | GO:Bio L4  | regulation of fusion of sperm to egg plasma membrane                | 5.8E-01 | 6.2E-01 | 9.9E-01 | 9.9E-01 | 3.4E-01 | 3.4E-01 | 2.1E-02 | 6.8E-01 | 5.1E-01 | 5.4E-01 | 1.0E-01 | 9.4E-01 |
| GO:0007031 | GO:Bio L4  | peroxisome organization                                             | 8.9E-01 | 7.6E-01 | 6.6E-01 | 5.1E-01 | 5.4E-02 | 5.9E-03 | 3.2E-02 | 3.6E-01 | 1.9E-01 | 2.9E-02 | 1.0E-01 | 4.9E-01 |
| GO:0004872 | GO:Mole L4 | receptor activity                                                   | 6.7E-01 | 1.2E-01 | 4.1E-01 | 3.7E-01 | 8.8E-02 | 2.4E-01 | 5.1E-02 | 6.7E-01 | 2.3E-01 | 1.3E-01 | 1.0E-01 | 5.9E-01 |

|            |            |                                                                     |         |         |         |         |         |         |         |         |         |         |         |         |
|------------|------------|---------------------------------------------------------------------|---------|---------|---------|---------|---------|---------|---------|---------|---------|---------|---------|---------|
| GO:0045182 | GO:Mole L2 | translation regulator activity                                      | 6.0E-01 | 1.3E-01 | 4.2E-02 | 4.5E-02 | 6.1E-01 | 5.3E-01 | 5.0E-01 | 6.7E-01 | 7.3E-01 | 2.5E-01 | 1.0E-01 | 1.4E-01 |
| GO:0043412 | GO:Bio L4  | macromolecule modification                                          | 5.3E-01 | 7.3E-02 | 2.2E-01 | 2.7E-01 | 8.8E-01 | 6.2E-01 | 9.6E-02 | 3.6E-01 | 8.2E-01 | 1.9E-01 | 1.0E-01 | 3.2E-01 |
| GO:0043005 | GO:Cell L4 | neuron projection                                                   | 4.6E-02 | 2.0E-04 | 1.3E-01 | 2.2E-02 | 4.1E-01 | 4.4E-01 | 1.6E-01 | 4.1E-01 | 9.4E-02 | 9.0E-04 | 1.0E-01 | 5.2E-02 |
| GO:0003299 | GO:Bio L4  | muscle hypertrophy in response to stress                            | 6.2E-01 | 4.3E-01 | 3.3E-02 | 1.0E-02 | 4.4E-01 | 9.6E-01 | 6.4E-01 | 7.4E-01 | 6.3E-01 | 7.8E-01 | 1.0E-01 | 4.4E-02 |
| GO:0022404 | GO:Bio L4  | molting cycle process                                               | 1.6E-01 | 2.4E-01 | 4.9E-01 | 5.9E-01 | 8.8E-01 | 9.2E-01 | 4.3E-02 | 7.7E-01 | 4.2E-01 | 5.6E-01 | 1.0E-01 | 8.1E-01 |
| GO:0044248 | GO:Bio L4  | cellular catabolic process                                          | 3.0E-01 | 1.8E-01 | 3.0E-01 | 1.0E-01 | 4.5E-01 | 7.0E-02 | 7.2E-02 | 2.7E-01 | 4.1E-01 | 6.9E-02 | 1.0E-01 | 1.3E-01 |
| GO:0046670 | GO:Bio L4  | positive regulation of retinal cell programmed cell death           | 1.2E-01 | 3.1E-01 | 2.3E-01 | 4.4E-01 | 5.4E-01 | 7.1E-01 | 9.4E-02 | 3.1E-01 | 2.3E-01 | 5.6E-01 | 1.0E-01 | 4.1E-01 |
| GO:0042611 | GO:Cell L4 | MHC protein complex                                                 | 8.3E-03 | 5.7E-03 | 2.2E-02 | 1.8E-02 | 3.8E-01 | 3.9E-01 | 9.7E-01 | 1.3E-01 | 2.2E-02 | 1.6E-02 | 1.0E-01 | 1.7E-02 |
| GO:0044431 | GO:Cell L4 | Golgi apparatus part                                                | 5.6E-01 | 1.3E-01 | 2.6E-01 | 3.1E-01 | 5.0E-01 | 6.3E-01 | 8.3E-02 | 2.4E-01 | 6.4E-01 | 2.8E-01 | 1.0E-01 | 2.7E-01 |
| GO:0002046 | GO:Mole L4 | opsin binding                                                       | 5.3E-02 | 1.9E-02 | 1.7E-01 | 1.2E-01 | 5.7E-01 | 7.3E-01 | 1.3E-01 | 9.0E-01 | 1.4E-01 | 7.4E-02 | 1.0E-01 | 3.5E-01 |
| 4514       | KEGG       | Cell adhesion molecules (CAMs)                                      | 5.0E-01 | 2.1E-01 | 2.9E-01 | 2.6E-01 | 3.3E-01 | 7.9E-01 | 7.4E-02 | 2.6E-01 | 4.6E-01 | 4.7E-01 | 1.0E-01 | 2.5E-01 |
| GO:0070684 | GO:Bio L4  | seminal clot liquefaction                                           | 7.3E-01 | 4.6E-01 | 4.0E-01 | 3.0E-01 | 4.5E-01 | 7.2E-01 | 5.5E-02 | 3.0E-01 | 6.9E-01 | 7.0E-01 | 1.0E-01 | 3.0E-01 |
| GO:0032844 | GO:Bio L4  | regulation of homeostatic process                                   | 9.0E-02 | 4.0E-02 | 2.0E-01 | 3.2E-01 | 3.5E-02 | 1.1E-01 | 1.1E-01 | 2.0E-01 | 2.1E-02 | 2.8E-02 | 1.1E-01 | 2.4E-01 |
| GO:0032388 | GO:Bio L4  | positive regulation of intracellular transport                      | 5.2E-02 | 5.7E-02 | 2.9E-01 | 1.3E-01 | 1.3E-01 | 3.3E-01 | 7.5E-02 | 5.8E-01 | 4.1E-02 | 9.4E-02 | 1.1E-01 | 2.7E-01 |
| GO:0045768 | GO:Bio L4  | positive regulation of anti-apoptosis                               | 6.3E-01 | 1.0E-01 | 1.8E-01 | 2.1E-01 | 4.6E-01 | 9.5E-01 | 1.2E-01 | 5.9E-01 | 6.5E-01 | 3.2E-01 | 1.1E-01 | 3.8E-01 |
| GO:0002251 | GO:Bio L4  | organ or tissue specific immune response                            | 2.8E-01 | 1.9E-01 | 1.5E-01 | 1.3E-01 | 5.3E-01 | 6.2E-01 | 1.5E-01 | 7.1E-01 | 4.3E-01 | 3.7E-01 | 1.1E-01 | 3.1E-01 |
| GO:0016918 | GO:Mole L4 | retinal binding                                                     | 3.4E-01 | 2.1E-01 | 7.3E-01 | 6.6E-01 | 2.8E-01 | 4.7E-01 | 3.1E-02 | 9.9E-01 | 3.2E-01 | 3.3E-01 | 1.1E-01 | 9.3E-01 |
| GO:0090048 | GO:Bio L4  | negative regulation of transcription regulator activity             | 8.4E-01 | 6.0E-01 | 1.7E-01 | 5.3E-02 | 9.5E-01 | 9.7E-01 | 1.3E-01 | 4.0E-02 | 9.8E-01 | 9.0E-01 | 1.1E-01 | 1.5E-02 |
| GO:0031557 | GO:Bio L4  | induction of programmed cell death in response to chemical stimulus | 3.9E-02 | 2.9E-01 | 3.0E-02 | 6.3E-02 | 2.3E-01 | 3.1E-01 | 7.5E-01 | 7.2E-01 | 5.1E-02 | 3.0E-01 | 1.1E-01 | 1.8E-01 |
| GO:0014047 | GO:Bio L4  | glutamate secretion                                                 | 5.5E-01 | 7.8E-02 | 3.3E-02 | 2.4E-02 | 2.9E-03 | 1.3E-02 | 6.9E-01 | 9.7E-01 | 1.2E-02 | 7.9E-03 | 1.1E-01 | 1.1E-01 |
| GO:0090047 | GO:Bio L4  | positive regulation of transcription regulator activity             | 3.9E-01 | 1.8E-01 | 3.0E-02 | 3.1E-03 | 3.7E-01 | 4.0E-02 | 7.6E-01 | 1.5E-01 | 4.2E-01 | 4.3E-02 | 1.1E-01 | 4.0E-03 |
| GO:0009615 | GO:Bio L4  | response to virus                                                   | 2.9E-01 | 1.5E-01 | 8.8E-02 | 5.5E-02 | 4.5E-01 | 6.4E-01 | 2.6E-01 | 8.5E-01 | 3.9E-01 | 3.2E-01 | 1.1E-01 | 1.9E-01 |
| GO:0031252 | GO:Cell L4 | cell leading edge                                                   | 7.1E-01 | 8.1E-01 | 7.1E-01 | 4.8E-01 | 3.6E-01 | 2.4E-01 | 3.2E-02 | 2.2E-01 | 6.0E-01 | 5.1E-01 | 1.1E-01 | 3.5E-01 |

|             |            |                                                                        |         |         |         |         |         |         |         |         |         |         |         |         |
|-------------|------------|------------------------------------------------------------------------|---------|---------|---------|---------|---------|---------|---------|---------|---------|---------|---------|---------|
| GO:0043218  | GO:Cell L4 | compact myelin                                                         | 9.1E-01 | 2.9E-01 | 6.6E-01 | 1.9E-01 | 1.7E-01 | 3.6E-02 | 3.5E-02 | 8.9E-01 | 4.4E-01 | 5.8E-02 | 1.1E-01 | 4.7E-01 |
| GO:0042175  | GO:Cell L4 | nuclear envelope-endoplasmic reticulum network                         | 1.3E-01 | 1.1E-01 | 2.1E-01 | 2.0E-01 | 1.8E-01 | 1.6E-01 | 1.1E-01 | 5.9E-01 | 1.1E-01 | 9.1E-02 | 1.1E-01 | 3.7E-01 |
| GO:0001880  | GO:Bio L4  | Mullerian duct regression                                              | 2.3E-01 | 1.8E-01 | 7.4E-02 | 1.4E-01 | 4.4E-01 | 1.3E-01 | 3.1E-01 | 7.2E-01 | 3.3E-01 | 1.1E-01 | 1.1E-01 | 3.2E-01 |
| GO:0019841  | GO:Mole L4 | retinol binding                                                        | 8.1E-01 | 8.0E-01 | 8.1E-01 | 5.8E-01 | 2.7E-01 | 5.0E-01 | 2.9E-02 | 8.4E-01 | 5.5E-01 | 7.6E-01 | 1.1E-01 | 8.4E-01 |
| PA165110621 | PharmGKB   | pgkb_pwy_Renin_Angiotensin_Aldosterone_System_acting_Drug_Pathways     | 5.9E-01 | 4.9E-01 | 6.5E-02 | 4.1E-02 | 9.8E-01 | 7.7E-01 | 3.5E-01 | 5.8E-02 | 8.9E-01 | 7.4E-01 | 1.1E-01 | 1.7E-02 |
| PA165110622 | PharmGKB   | pgkb_pwy_Renin_Angiotensin_Aldosterone_System_acting_Drug_Pathways     | 5.9E-01 | 4.9E-01 | 6.5E-02 | 4.1E-02 | 9.8E-01 | 7.7E-01 | 3.5E-01 | 5.8E-02 | 8.9E-01 | 7.4E-01 | 1.1E-01 | 1.7E-02 |
| PA2023      | PharmGKB   | pgkb_pwy_ACE_inhibitor_Pathway                                         | 5.9E-01 | 4.9E-01 | 6.5E-02 | 4.1E-02 | 9.8E-01 | 7.7E-01 | 3.5E-01 | 5.8E-02 | 8.9E-01 | 7.4E-01 | 1.1E-01 | 1.7E-02 |
| GO:0004791  | GO:Mole L4 | thioredoxin-disulfide reductase activity                               | 8.5E-01 | 1.6E-01 | 5.2E-01 | 6.2E-01 | 4.2E-01 | 2.1E-01 | 4.5E-02 | 8.3E-02 | 7.2E-01 | 1.5E-01 | 1.1E-01 | 2.0E-01 |
| GO:0032507  | GO:Bio L4  | maintenance of protein location in cell                                | 5.8E-01 | 4.2E-01 | 9.7E-01 | 9.1E-01 | 5.2E-01 | 2.3E-01 | 2.4E-02 | 5.2E-01 | 6.6E-01 | 3.2E-01 | 1.1E-01 | 8.2E-01 |
| GO:0007018  | GO:Bio L4  | microtubule-based movement                                             | 1.4E-01 | 1.3E-01 | 6.2E-02 | 7.9E-02 | 5.3E-01 | 6.8E-01 | 3.8E-01 | 9.8E-01 | 2.7E-01 | 3.0E-01 | 1.1E-01 | 2.8E-01 |
| GO:0005789  | GO:Cell L4 | endoplasmic reticulum membrane                                         | 2.0E-01 | 1.4E-01 | 2.3E-01 | 2.3E-01 | 1.6E-01 | 1.5E-01 | 1.0E-01 | 6.9E-01 | 1.4E-01 | 1.0E-01 | 1.1E-01 | 4.5E-01 |
| GO:0007091  | GO:Bio L4  | mitotic metaphase/anaphase transition                                  | 8.3E-01 | 3.2E-01 | 9.4E-01 | 9.2E-01 | 5.5E-01 | 8.9E-02 | 2.5E-02 | 9.1E-01 | 8.1E-01 | 1.3E-01 | 1.1E-01 | 9.8E-01 |
| GO:0060760  | GO:Bio L4  | positive regulation of response to cytokine stimulus                   | 6.3E-01 | 5.9E-01 | 9.6E-01 | 9.4E-01 | 5.6E-01 | 9.0E-01 | 2.4E-02 | 5.6E-01 | 7.2E-01 | 8.7E-01 | 1.1E-01 | 8.6E-01 |
| GO:0070168  | GO:Bio L4  | negative regulation of biomineral formation                            | 8.5E-01 | 7.3E-01 | 8.9E-01 | 9.9E-01 | 2.3E-01 | 6.5E-01 | 2.6E-02 | 8.2E-01 | 5.2E-01 | 8.3E-01 | 1.1E-01 | 9.8E-01 |
| GO:0001556  | GO:Bio L4  | oocyte maturation                                                      | 2.7E-01 | 7.0E-02 | 1.1E-01 | 5.2E-02 | 4.9E-01 | 4.0E-01 | 2.1E-01 | 5.5E-02 | 4.0E-01 | 1.3E-01 | 1.1E-01 | 2.0E-02 |
| 1040        | KEGG       | Biosynthesis of unsaturated fatty acids                                | 5.1E-01 | 5.1E-01 | 5.4E-01 | 5.3E-01 | 2.7E-01 | 5.9E-02 | 4.4E-02 | 1.4E-01 | 4.2E-01 | 1.3E-01 | 1.1E-01 | 2.7E-01 |
| GO:0051828  | GO:Bio L4  | entry into other organism during symbiotic interaction                 | 6.0E-01 | 7.1E-01 | 2.4E-02 | 6.7E-02 | 9.9E-01 | 7.5E-01 | 9.9E-01 | 5.4E-01 | 9.1E-01 | 8.7E-01 | 1.1E-01 | 1.6E-01 |
| GO:0052126  | GO:Bio L4  | movement in host environment                                           | 6.0E-01 | 7.1E-01 | 2.4E-02 | 6.7E-02 | 9.9E-01 | 7.5E-01 | 9.9E-01 | 5.4E-01 | 9.1E-01 | 8.7E-01 | 1.1E-01 | 1.6E-01 |
| GO:0052192  | GO:Bio L4  | movement in environment of other organism during symbiotic interaction | 6.0E-01 | 7.1E-01 | 2.4E-02 | 6.7E-02 | 9.9E-01 | 7.5E-01 | 9.9E-01 | 5.4E-01 | 9.1E-01 | 8.7E-01 | 1.1E-01 | 1.6E-01 |

|             |            |                                                                  |         |         |         |         |         |         |         |         |         |         |         |         |
|-------------|------------|------------------------------------------------------------------|---------|---------|---------|---------|---------|---------|---------|---------|---------|---------|---------|---------|
| GO:0001918  | GO:Mole L4 | farnesylated protein binding                                     | 7.0E-01 | 3.9E-01 | 3.2E-01 | 7.2E-02 | 2.4E-02 | 1.6E-02 | 7.5E-02 | 5.7E-02 | 8.5E-02 | 3.9E-02 | 1.1E-01 | 2.7E-02 |
| GO:0007412  | GO:Bio L4  | axon target recognition                                          | 4.3E-01 | 7.7E-01 | 1.3E-01 | 1.2E-01 | 6.7E-02 | 7.3E-02 | 1.8E-01 | 1.8E-01 | 1.3E-01 | 2.2E-01 | 1.1E-01 | 1.0E-01 |
| GO:0033596  | GO:Cell L4 | TSC1-TSC2 complex                                                | 1.9E-01 | 2.0E-01 | 5.3E-01 | 3.5E-01 | 1.8E-01 | 1.5E-02 | 4.5E-02 | 1.7E-01 | 1.6E-01 | 2.1E-02 | 1.1E-01 | 2.3E-01 |
| GO:0014874  | GO:Bio L4  | response to stimulus involved in regulation of muscle adaptation | 5.4E-01 | 2.8E-01 | 3.7E-02 | 1.1E-02 | 2.5E-01 | 8.1E-01 | 6.4E-01 | 7.5E-01 | 4.1E-01 | 5.7E-01 | 1.1E-01 | 4.9E-02 |
| GO:0003723  | GO:Mole L4 | RNA binding                                                      | 9.6E-01 | 8.0E-01 | 8.4E-01 | 6.9E-01 | 4.8E-01 | 1.9E-01 | 2.9E-02 | 6.2E-01 | 8.2E-01 | 4.4E-01 | 1.1E-01 | 7.9E-01 |
| GO:0042633  | GO:Bio L4  | hair cycle                                                       | 1.7E-01 | 2.6E-01 | 5.1E-01 | 6.1E-01 | 9.0E-01 | 9.3E-01 | 4.7E-02 | 7.8E-01 | 4.4E-01 | 5.8E-01 | 1.1E-01 | 8.3E-01 |
| GO:0048306  | GO:Mole L4 | calcium-dependent protein binding                                | 3.0E-01 | 6.1E-01 | 5.7E-01 | 4.3E-01 | 6.8E-01 | 9.8E-01 | 4.2E-02 | 8.7E-01 | 5.3E-01 | 9.0E-01 | 1.1E-01 | 7.4E-01 |
| 2010        | KEGG       | ABC transporters                                                 | 1.0E-01 | 2.9E-03 | 8.5E-02 | 5.8E-02 | 8.1E-01 | 8.3E-01 | 2.8E-01 | 8.7E-01 | 2.9E-01 | 1.7E-02 | 1.1E-01 | 2.0E-01 |
| PA162356267 | PharmGKB   | pgkb_pwy_EGFR_Inhibitors_Pathway_PD                              | 4.2E-01 | 7.8E-01 | 9.0E-01 | 7.5E-01 | 6.0E-01 | 3.1E-01 | 2.7E-02 | 1.7E-01 | 6.0E-01 | 5.9E-01 | 1.1E-01 | 4.0E-01 |
| GO:0070013  | GO:Cell L4 | intracellular organelle lumen                                    | 4.1E-01 | 2.6E-01 | 1.5E-01 | 3.9E-02 | 8.6E-01 | 7.6E-01 | 1.7E-01 | 5.5E-01 | 7.2E-01 | 5.1E-01 | 1.1E-01 | 1.0E-01 |
| GO:0030897  | GO:Cell L4 | HOPS complex                                                     | 7.2E-03 | 4.3E-03 | 4.1E-02 | 2.6E-02 | 9.5E-01 | 7.3E-01 | 5.9E-01 | 7.5E-01 | 4.1E-02 | 2.1E-02 | 1.1E-01 | 9.5E-02 |
| GO:0008180  | GO:Cell L4 | signalosome                                                      | 5.4E-01 | 4.9E-01 | 1.2E-01 | 2.2E-01 | 9.2E-01 | 9.0E-01 | 2.0E-01 | 8.2E-01 | 8.4E-01 | 8.0E-01 | 1.2E-01 | 4.9E-01 |
| GO:0044430  | GO:Cell L4 | cytoskeletal part                                                | 3.3E-01 | 1.1E-01 | 8.8E-01 | 8.9E-01 | 1.2E-01 | 1.5E-02 | 2.8E-02 | 7.2E-01 | 1.7E-01 | 1.2E-02 | 1.2E-01 | 9.3E-01 |
| GO:0042138  | GO:Bio L4  | meiotic DNA double-strand break formation                        | 6.9E-01 | 8.3E-01 | 3.4E-01 | 3.2E-01 | 9.6E-01 | 6.0E-01 | 7.2E-02 | 1.0E+00 | 9.3E-01 | 8.5E-01 | 1.2E-01 | 6.8E-01 |
| GO:0090079  | GO:Mole L4 | translation regulator activity, nucleic acid binding             | 3.8E-01 | 6.2E-02 | 4.6E-02 | 4.8E-02 | 4.2E-01 | 6.8E-01 | 5.3E-01 | 7.1E-01 | 4.5E-01 | 1.8E-01 | 1.2E-01 | 1.5E-01 |
| GO:0007548  | GO:Bio L4  | sex differentiation                                              | 1.5E-01 | 3.6E-01 | 1.3E-01 | 9.4E-02 | 5.0E-01 | 2.4E-01 | 1.9E-01 | 1.9E-01 | 2.7E-01 | 3.0E-01 | 1.2E-01 | 9.1E-02 |
| GO:0005840  | GO:Cell L4 | ribosome                                                         | 2.6E-01 | 3.5E-01 | 2.5E-01 | 4.9E-01 | 4.5E-01 | 7.5E-01 | 1.0E-01 | 8.9E-01 | 3.7E-01 | 6.1E-01 | 1.2E-01 | 8.0E-01 |
| GO:0006903  | GO:Bio L4  | vesicle targeting                                                | 7.6E-01 | 5.1E-01 | 7.2E-01 | 7.4E-01 | 5.4E-01 | 4.3E-01 | 3.5E-02 | 2.3E-01 | 7.8E-01 | 5.5E-01 | 1.2E-01 | 4.7E-01 |
| GO:0051536  | GO:Mole L4 | iron-sulfur cluster binding                                      | 2.4E-01 | 1.2E-01 | 1.1E-01 | 2.5E-01 | 8.5E-01 | 5.7E-01 | 2.3E-01 | 6.0E-01 | 5.3E-01 | 2.5E-01 | 1.2E-01 | 4.4E-01 |
| GO:0016080  | GO:Bio L4  | synaptic vesicle targeting                                       | 1.4E-01 | 8.3E-02 | 7.8E-01 | 6.0E-01 | 1.6E-01 | 1.4E-01 | 3.2E-02 | 3.0E-01 | 1.1E-01 | 6.3E-02 | 1.2E-01 | 4.9E-01 |
| 190         | KEGG       | Oxidative phosphorylation                                        | 9.0E-01 | 6.9E-01 | 3.1E-01 | 2.5E-01 | 4.5E-01 | 1.4E-01 | 8.1E-02 | 1.4E-01 | 7.7E-01 | 3.2E-01 | 1.2E-01 | 1.5E-01 |
| GO:0046649  | GO:Bio L4  | lymphocyte activation                                            | 1.1E-01 | 6.0E-02 | 1.6E-01 | 2.3E-01 | 6.4E-01 | 5.0E-01 | 1.5E-01 | 3.9E-01 | 2.5E-01 | 1.3E-01 | 1.2E-01 | 3.1E-01 |
| GO:0001957  | GO:Bio L4  | intramembranous ossification                                     | 2.1E-01 | 5.4E-01 | 4.6E-02 | 5.6E-02 | 3.3E-01 | 5.8E-02 | 5.5E-01 | 1.5E-01 | 2.5E-01 | 1.4E-01 | 1.2E-01 | 4.9E-02 |
| GO:0051128  | GO:Bio L4  | regulation of cellular component organization                    | 1.4E-01 | 3.5E-03 | 4.4E-01 | 2.1E-01 | 3.7E-02 | 4.8E-02 | 5.6E-02 | 8.1E-01 | 3.3E-02 | 1.6E-03 | 1.2E-01 | 4.7E-01 |
| PA2035      | PharmGKB   | pgkb_pwy_Cyclophosphamide_Pathway                                | 6.0E-02 | 3.9E-02 | 4.0E-02 | 1.1E-01 | 5.9E-01 | 5.3E-01 | 6.3E-01 | 6.1E-01 | 1.5E-01 | 1.0E-01 | 1.2E-01 | 2.4E-01 |
| GO:0000910  | GO:Bio L4  | cytokinesis                                                      | 4.1E-01 | 2.3E-01 | 4.5E-01 | 2.7E-01 | 9.8E-01 | 6.8E-01 | 5.7E-02 | 8.5E-01 | 7.7E-01 | 4.5E-01 | 1.2E-01 | 5.6E-01 |
| GO:0001653  | GO:Mole L4 | peptide receptor activity                                        | 6.0E-01 | 3.4E-01 | 3.4E-01 | 4.0E-01 | 4.0E-01 | 7.3E-01 | 7.5E-02 | 8.5E-01 | 5.8E-01 | 5.9E-01 | 1.2E-01 | 7.1E-01 |

|            |            |                                                     |         |         |         |         |         |         |         |         |         |         |         |         |
|------------|------------|-----------------------------------------------------|---------|---------|---------|---------|---------|---------|---------|---------|---------|---------|---------|---------|
| GO:0031312 | GO:Cell L4 | extrinsic to organelle membrane                     | 7.8E-01 | 7.2E-01 | 1.4E-01 | 1.3E-01 | 8.2E-01 | 8.3E-01 | 1.8E-01 | 1.0E-01 | 9.2E-01 | 9.0E-01 | 1.2E-01 | 7.2E-02 |
| GO:0010891 | GO:Bio L4  | negative regulation of sequestering of triglyceride | 9.9E-01 | 6.8E-01 | 9.4E-01 | 8.3E-01 | 3.3E-01 | 2.5E-01 | 2.7E-02 | 4.9E-01 | 6.9E-01 | 4.7E-01 | 1.2E-01 | 7.7E-01 |
| GO:0021604 | GO:Bio L4  | cranial nerve structural organization               | 2.7E-02 | 2.6E-01 | 2.1E-01 | 5.4E-01 | 6.4E-01 | 6.5E-01 | 1.2E-01 | 4.5E-01 | 8.8E-02 | 4.7E-01 | 1.2E-01 | 5.9E-01 |
| GO:0007440 | GO:Bio L4  | foregut morphogenesis                               | 8.3E-01 | 4.4E-01 | 8.9E-01 | 9.6E-01 | 7.7E-01 | 5.4E-01 | 2.9E-02 | 9.1E-01 | 9.2E-01 | 5.8E-01 | 1.2E-01 | 9.9E-01 |
| GO:0016188 | GO:Bio L4  | synaptic vesicle maturation                         | 5.7E-01 | 6.2E-01 | 1.0E-01 | 8.8E-02 | 7.6E-01 | 7.2E-01 | 2.5E-01 | 5.0E-01 | 8.0E-01 | 8.1E-01 | 1.2E-01 | 1.8E-01 |
| GO:0017171 | GO:Mole L4 | serine hydrolase activity                           | 6.4E-01 | 9.3E-01 | 6.6E-01 | 5.9E-01 | 1.4E-01 | 2.9E-02 | 3.9E-02 | 2.9E-01 | 3.0E-01 | 1.2E-01 | 1.2E-01 | 4.8E-01 |
| GO:0019042 | GO:Bio L4  | latent virus infection                              | 2.0E-02 | 7.0E-02 | 1.0E-01 | 1.3E-01 | 1.3E-01 | 7.0E-01 | 2.5E-01 | 3.7E-01 | 1.8E-02 | 2.0E-01 | 1.2E-01 | 1.9E-01 |
| GO:0019046 | GO:Bio L4  | reactivation of latent virus                        | 2.0E-02 | 7.0E-02 | 1.0E-01 | 1.3E-01 | 1.3E-01 | 7.0E-01 | 2.5E-01 | 3.7E-01 | 1.8E-02 | 2.0E-01 | 1.2E-01 | 1.9E-01 |
| GO:0048609 | GO:Bio L4  | reproductive process in a multicellular organism    | 9.6E-01 | 5.3E-01 | 1.2E-01 | 2.1E-01 | 8.9E-01 | 4.0E-01 | 2.2E-01 | 6.4E-01 | 9.9E-01 | 5.4E-01 | 1.2E-01 | 4.0E-01 |
| GO:0051650 | GO:Bio L4  | establishment of vesicle localization               | 6.2E-01 | 2.5E-01 | 8.8E-01 | 8.9E-01 | 5.8E-01 | 2.5E-01 | 3.0E-02 | 1.1E-01 | 7.2E-01 | 2.3E-01 | 1.2E-01 | 3.3E-01 |
| GO:0033279 | GO:Cell L4 | ribosomal subunit                                   | 4.7E-01 | 7.7E-01 | 5.0E-01 | 7.4E-01 | 7.0E-01 | 8.2E-01 | 5.3E-02 | 8.7E-01 | 6.9E-01 | 9.2E-01 | 1.2E-01 | 9.3E-01 |
| GO:0007599 | GO:Bio L4  | hemostasis                                          | 5.2E-01 | 2.1E-01 | 5.4E-02 | 3.2E-02 | 1.9E-01 | 5.1E-01 | 5.0E-01 | 8.5E-01 | 3.3E-01 | 3.5E-01 | 1.2E-01 | 1.3E-01 |
| GO:0030336 | GO:Bio L4  | negative regulation of cell migration               | 1.4E-02 | 4.0E-03 | 3.0E-02 | 3.6E-02 | 3.5E-02 | 5.1E-01 | 9.0E-01 | 5.9E-01 | 4.2E-03 | 1.5E-02 | 1.2E-01 | 1.0E-01 |
| GO:0019048 | GO:Bio L4  | virus-host interaction                              | 1.1E-01 | 1.1E-01 | 1.5E-01 | 1.2E-01 | 5.5E-02 | 1.9E-01 | 1.8E-01 | 2.3E-01 | 3.8E-02 | 1.0E-01 | 1.2E-01 | 1.3E-01 |
| GO:0010458 | GO:Bio L4  | exit from mitosis                                   | 4.3E-01 | 3.3E-01 | 8.0E-01 | 8.7E-01 | 1.8E-01 | 6.5E-02 | 3.4E-02 | 2.0E-01 | 2.8E-01 | 1.0E-01 | 1.3E-01 | 4.8E-01 |
| GO:0008610 | GO:Bio L4  | lipid biosynthetic process                          | 4.1E-01 | 3.4E-01 | 4.3E-01 | 7.3E-01 | 3.2E-01 | 5.6E-01 | 6.4E-02 | 3.8E-01 | 4.0E-01 | 5.1E-01 | 1.3E-01 | 6.3E-01 |
| GO:0051961 | GO:Bio L4  | negative regulation of nervous system development   | 4.7E-01 | 4.5E-01 | 7.2E-01 | 8.4E-01 | 4.2E-01 | 8.9E-01 | 3.8E-02 | 6.5E-01 | 5.2E-01 | 7.7E-01 | 1.3E-01 | 8.8E-01 |
| GO:0051964 | GO:Bio L4  | negative regulation of synaptogenesis               | 4.7E-01 | 4.5E-01 | 7.2E-01 | 8.4E-01 | 4.2E-01 | 8.9E-01 | 3.8E-02 | 6.5E-01 | 5.2E-01 | 7.7E-01 | 1.3E-01 | 8.8E-01 |
| GO:0045787 | GO:Bio L4  | positive regulation of cell cycle                   | 4.2E-01 | 5.5E-01 | 5.1E-01 | 5.7E-01 | 3.3E-01 | 7.0E-01 | 5.4E-02 | 7.8E-01 | 4.1E-01 | 7.5E-01 | 1.3E-01 | 8.1E-01 |
| GO:0045277 | GO:Cell L4 | respiratory chain complex IV                        | 6.8E-01 | 1.3E-01 | 3.0E-02 | 1.3E-02 | 7.6E-01 | 8.9E-01 | 9.4E-01 | 6.3E-01 | 8.6E-01 | 3.7E-01 | 1.3E-01 | 4.6E-02 |
| GO:0001554 | GO:Bio L4  | luteolysis                                          | 2.4E-01 | 4.4E-01 | 4.3E-01 | 6.3E-01 | 6.8E-01 | 8.2E-01 | 6.4E-02 | 2.2E-01 | 4.6E-01 | 7.3E-01 | 1.3E-01 | 4.1E-01 |

|            |            |                                                                                                |         |         |         |         |         |         |         |         |         |         |         |         |
|------------|------------|------------------------------------------------------------------------------------------------|---------|---------|---------|---------|---------|---------|---------|---------|---------|---------|---------|---------|
| GO:0016820 | GO:Mole L4 | hydrolase activity, acting on acid anhydrides, catalyzing transmembrane movement of substances | 3.0E-01 | 2.3E-02 | 3.6E-01 | 1.4E-01 | 6.7E-01 | 8.2E-01 | 7.7E-02 | 8.7E-01 | 5.2E-01 | 9.4E-02 | 1.3E-01 | 3.8E-01 |
| GO:0005929 | GO:Cell L4 | cilium                                                                                         | 9.5E-02 | 2.8E-02 | 8.7E-02 | 9.7E-02 | 4.7E-01 | 1.3E-01 | 3.2E-01 | 6.7E-01 | 1.8E-01 | 2.4E-02 | 1.3E-01 | 2.4E-01 |
| GO:0009725 | GO:Bio L4  | response to hormone stimulus                                                                   | 3.6E-01 | 1.9E-02 | 5.1E-01 | 3.1E-01 | 4.1E-01 | 2.4E-01 | 5.5E-02 | 8.1E-01 | 4.3E-01 | 3.0E-02 | 1.3E-01 | 6.0E-01 |
| GO:0001300 | GO:Bio L4  | chronological cell aging                                                                       | 1.3E-01 | 2.0E-01 | 4.8E-02 | 2.8E-02 | 9.1E-01 | 4.3E-01 | 5.8E-01 | 3.0E-01 | 3.7E-01 | 3.0E-01 | 1.3E-01 | 4.9E-02 |
| GO:0031650 | GO:Bio L4  | regulation of heat generation                                                                  | 5.5E-01 | 5.4E-01 | 1.9E-01 | 3.2E-01 | 5.9E-01 | 6.7E-01 | 1.5E-01 | 1.0E-01 | 6.9E-01 | 7.3E-01 | 1.3E-01 | 1.4E-01 |
| GO:0031652 | GO:Bio L4  | positive regulation of heat generation                                                         | 5.5E-01 | 5.4E-01 | 1.9E-01 | 3.2E-01 | 5.9E-01 | 6.7E-01 | 1.5E-01 | 1.0E-01 | 6.9E-01 | 7.3E-01 | 1.3E-01 | 1.4E-01 |
| GO:0004342 | GO:Mole L4 | glucosamine-6-phosphate deaminase activity                                                     | 7.1E-01 | 7.6E-01 | 6.4E-01 | 5.9E-01 | 1.1E-01 | 1.7E-01 | 4.4E-02 | 2.7E-02 | 2.8E-01 | 3.9E-01 | 1.3E-01 | 8.1E-02 |
| GO:0042180 | GO:Bio L4  | cellular ketone metabolic process                                                              | 1.6E-01 | 1.7E-02 | 3.5E-01 | 3.1E-01 | 1.1E-02 | 3.4E-02 | 7.9E-02 | 3.7E-01 | 1.3E-02 | 5.0E-03 | 1.3E-01 | 3.6E-01 |
| GO:0042321 | GO:Bio L4  | negative regulation of circadian sleep/wake cycle, sleep                                       | 8.9E-02 | 4.8E-02 | 8.5E-02 | 6.8E-02 | 1.5E-01 | 8.9E-02 | 3.3E-01 | 4.2E-01 | 7.2E-02 | 2.7E-02 | 1.3E-01 | 1.3E-01 |
| GO:0042754 | GO:Bio L4  | negative regulation of circadian rhythm                                                        | 8.9E-02 | 4.8E-02 | 8.5E-02 | 6.8E-02 | 1.5E-01 | 8.9E-02 | 3.3E-01 | 4.2E-01 | 7.2E-02 | 2.7E-02 | 1.3E-01 | 1.3E-01 |
| 4144       | KEGG       | Endocytosis                                                                                    | 1.6E-01 | 9.1E-02 | 7.1E-02 | 4.0E-02 | 4.9E-01 | 7.0E-01 | 3.9E-01 | 6.6E-01 | 2.8E-01 | 2.4E-01 | 1.3E-01 | 1.2E-01 |
| GO:0043244 | GO:Bio L4  | regulation of protein complex disassembly                                                      | 3.2E-01 | 1.3E-01 | 4.6E-01 | 2.7E-01 | 1.8E-01 | 2.1E-02 | 6.1E-02 | 8.3E-01 | 2.2E-01 | 1.8E-02 | 1.3E-01 | 5.6E-01 |
| GO:0042886 | GO:Bio L4  | amide transport                                                                                | 7.9E-01 | 8.0E-01 | 3.6E-01 | 4.0E-01 | 6.5E-01 | 4.7E-01 | 7.9E-02 | 1.5E-02 | 8.5E-01 | 7.5E-01 | 1.3E-01 | 3.6E-02 |
| GO:0016012 | GO:Cell L4 | sarcoglycan complex                                                                            | 2.2E-01 | 2.7E-01 | 1.9E-01 | 1.7E-01 | 4.1E-01 | 5.4E-01 | 1.5E-01 | 6.7E-02 | 3.0E-01 | 4.3E-01 | 1.3E-01 | 6.1E-02 |
| GO:0060326 | GO:Bio L4  | cell chemotaxis                                                                                | 3.3E-02 | 5.5E-02 | 4.3E-02 | 2.2E-02 | 4.3E-02 | 1.6E-01 | 6.6E-01 | 2.3E-01 | 1.1E-02 | 5.0E-02 | 1.3E-01 | 3.3E-02 |
| 534        | KEGG       | Glycosaminoglycan biosynthesis - heparan sulfate                                               | 5.7E-01 | 3.4E-01 | 3.0E-02 | 9.4E-02 | 6.4E-01 | 9.6E-01 | 9.5E-01 | 2.3E-01 | 7.3E-01 | 6.9E-01 | 1.3E-01 | 1.1E-01 |
| GO:0051439 | GO:Bio L4  | regulation of ubiquitin-protein ligase activity during mitotic cell cycle                      | 5.8E-01 | 2.2E-01 | 3.1E-01 | 3.0E-01 | 8.6E-01 | 6.5E-01 | 9.1E-02 | 8.6E-01 | 8.4E-01 | 4.2E-01 | 1.3E-01 | 6.0E-01 |
| 4660       | KEGG       | T cell receptor signaling pathway                                                              | 2.6E-01 | 4.1E-01 | 8.0E-01 | 6.0E-01 | 4.5E-01 | 4.1E-01 | 3.6E-02 | 1.2E-01 | 3.7E-01 | 4.6E-01 | 1.3E-01 | 2.6E-01 |
| GO:0016229 | GO:Mole L4 | steroid dehydrogenase activity                                                                 | 8.0E-01 | 9.8E-01 | 8.1E-01 | 6.9E-01 | 3.9E-01 | 7.0E-01 | 3.6E-02 | 6.3E-01 | 6.8E-01 | 9.4E-01 | 1.3E-01 | 7.9E-01 |
| GO:0051651 | GO:Bio L4  | maintenance of location in cell                                                                | 5.8E-01 | 5.3E-01 | 9.7E-01 | 9.3E-01 | 5.7E-01 | 2.9E-01 | 3.0E-02 | 3.3E-01 | 7.0E-01 | 4.5E-01 | 1.3E-01 | 6.7E-01 |

|             |            |                                                           |         |         |         |         |         |         |         |         |         |         |         |         |
|-------------|------------|-----------------------------------------------------------|---------|---------|---------|---------|---------|---------|---------|---------|---------|---------|---------|---------|
| GO:0003016  | GO:Bio L4  | respiratory system process                                | 5.9E-01 | 2.8E-01 | 3.2E-01 | 2.4E-01 | 3.9E-02 | 3.9E-01 | 9.1E-02 | 3.4E-01 | 1.1E-01 | 3.5E-01 | 1.3E-01 | 2.8E-01 |
| GO:0050854  | GO:Bio L4  | regulation of antigen receptor-mediated signaling pathway | 2.4E-01 | 2.2E-01 | 5.3E-02 | 1.2E-01 | 2.8E-01 | 8.5E-02 | 5.5E-01 | 4.6E-02 | 2.5E-01 | 9.3E-02 | 1.3E-01 | 3.3E-02 |
| GO:0001520  | GO:Cell L4 | outer dense fiber                                         | 6.8E-01 | 4.6E-02 | 1.6E-01 | 7.0E-02 | 5.3E-01 | 7.3E-01 | 1.8E-01 | 1.9E-01 | 7.3E-01 | 1.5E-01 | 1.3E-01 | 7.0E-02 |
| 430         | KEGG       | Taurine and hypotaurine metabolism                        | 3.2E-01 | 2.1E-01 | 4.0E-02 | 2.1E-02 | 3.7E-01 | 4.0E-01 | 7.4E-01 | 8.5E-02 | 3.7E-01 | 2.9E-01 | 1.3E-01 | 1.3E-02 |
| GO:0008368  | GO:Mole L4 | Gram-negative bacterial binding                           | 8.9E-01 | 7.0E-01 | 3.3E-01 | 4.6E-01 | 9.7E-01 | 9.9E-01 | 8.8E-02 | 6.5E-01 | 9.9E-01 | 9.5E-01 | 1.3E-01 | 6.6E-01 |
| GO:0016741  | GO:Mole L4 | transferase activity, transferring one-carbon groups      | 1.6E-01 | 1.9E-01 | 4.4E-02 | 1.8E-02 | 6.7E-01 | 4.4E-01 | 6.7E-01 | 7.0E-01 | 3.5E-01 | 3.0E-01 | 1.3E-01 | 6.6E-02 |
| GO:0006644  | GO:Bio L4  | phospholipid metabolic process                            | 7.9E-01 | 5.9E-01 | 3.2E-01 | 5.5E-01 | 8.9E-02 | 3.3E-01 | 9.1E-02 | 4.8E-01 | 2.6E-01 | 5.1E-01 | 1.3E-01 | 6.2E-01 |
| 4666        | KEGG       | Fc gamma R-mediated phagocytosis                          | 9.8E-01 | 9.0E-01 | 3.2E-01 | 2.8E-01 | 2.7E-01 | 6.8E-02 | 9.1E-02 | 2.6E-01 | 6.2E-01 | 2.3E-01 | 1.3E-01 | 2.6E-01 |
| GO:0006793  | GO:Bio L4  | phosphorus metabolic process                              | 3.8E-01 | 1.5E-01 | 5.2E-01 | 6.1E-01 | 6.1E-01 | 3.4E-01 | 5.6E-02 | 5.7E-02 | 5.7E-01 | 2.1E-01 | 1.3E-01 | 1.5E-01 |
| GO:0060021  | GO:Bio L4  | palate development                                        | 2.2E-01 | 4.0E-01 | 4.2E-01 | 4.7E-01 | 9.7E-01 | 6.8E-01 | 7.0E-02 | 2.1E-01 | 5.4E-01 | 6.3E-01 | 1.3E-01 | 3.3E-01 |
| GO:0005344  | GO:Mole L4 | oxygen transporter activity                               | 7.4E-02 | 8.8E-02 | 1.8E-01 | 1.1E-01 | 2.9E-01 | 7.0E-01 | 1.6E-01 | 4.5E-01 | 1.0E-01 | 2.3E-01 | 1.3E-01 | 2.0E-01 |
| GO:0016565  | GO:Mole L4 | general transcriptional repressor activity                | 6.8E-01 | 5.6E-01 | 3.5E-01 | 3.2E-01 | 8.2E-01 | 6.7E-01 | 8.6E-02 | 9.7E-01 | 8.8E-01 | 7.5E-01 | 1.3E-01 | 6.7E-01 |
| GO:0008656  | GO:Mole L4 | caspase activator activity                                | 2.9E-01 | 6.9E-02 | 6.8E-02 | 4.0E-02 | 1.3E-01 | 3.8E-01 | 4.4E-01 | 5.3E-01 | 1.6E-01 | 1.2E-01 | 1.3E-01 | 1.0E-01 |
| GO:0008285  | GO:Bio L4  | negative regulation of cell proliferation                 | 1.7E-01 | 1.1E-02 | 2.0E-01 | 2.6E-01 | 6.1E-01 | 7.4E-01 | 1.5E-01 | 6.4E-02 | 3.4E-01 | 4.6E-02 | 1.4E-01 | 8.6E-02 |
| GO:0019211  | GO:Mole L4 | phosphatase activator activity                            | 8.4E-01 | 8.5E-01 | 6.2E-01 | 7.7E-01 | 6.8E-01 | 1.3E-01 | 4.9E-02 | 6.1E-02 | 8.9E-01 | 3.6E-01 | 1.4E-01 | 1.9E-01 |
| GO:0045196  | GO:Bio L4  | establishment or maintenance of neuroblast polarity       | 5.3E-02 | 1.2E-01 | 4.6E-02 | 4.2E-02 | 8.0E-01 | 8.7E-01 | 6.6E-01 | 4.4E-01 | 1.8E-01 | 3.4E-01 | 1.4E-01 | 9.3E-02 |
| PA165111375 | PharmGKB   | pgkb_pwy_Benzodiazepine_pathway_PK                        | 5.9E-01 | 4.5E-01 | 1.6E-01 | 1.8E-01 | 8.1E-01 | 7.2E-01 | 2.0E-01 | 2.2E-01 | 8.3E-01 | 6.9E-01 | 1.4E-01 | 1.7E-01 |
| GO:0005732  | GO:Cell L4 | small nucleolar ribonucleoprotein complex                 | 1.9E-01 | 2.3E-01 | 3.8E-02 | 1.2E-01 | 7.6E-01 | 7.8E-01 | 8.0E-01 | 5.2E-01 | 4.2E-01 | 4.9E-01 | 1.4E-01 | 2.3E-01 |
| GO:0048308  | GO:Bio L4  | organelle inheritance                                     | 8.5E-01 | 6.9E-01 | 8.5E-01 | 7.5E-01 | 9.6E-01 | 6.3E-01 | 3.6E-02 | 5.4E-02 | 9.8E-01 | 7.9E-01 | 1.4E-01 | 1.7E-01 |
| GO:0050819  | GO:Bio L4  | negative regulation of coagulation                        | 6.9E-01 | 4.5E-01 | 4.3E-01 | 3.3E-01 | 1.7E-01 | 3.3E-01 | 7.2E-02 | 5.5E-01 | 3.6E-01 | 4.4E-01 | 1.4E-01 | 4.9E-01 |
| GO:0006082  | GO:Bio L4  | organic acid metabolic process                            | 2.9E-01 | 3.8E-02 | 3.8E-01 | 3.2E-01 | 1.7E-02 | 2.8E-02 | 8.3E-02 | 3.7E-01 | 3.1E-02 | 8.5E-03 | 1.4E-01 | 3.7E-01 |



|            |            |                                                       |         |         |         |         |         |         |         |         |         |         |         |         |
|------------|------------|-------------------------------------------------------|---------|---------|---------|---------|---------|---------|---------|---------|---------|---------|---------|---------|
| GO:0001704 | GO:Bio L4  | formation of primary germ layer                       | 4.5E-01 | 3.7E-01 | 1.6E-01 | 2.0E-01 | 4.1E-01 | 3.9E-02 | 1.9E-01 | 9.8E-01 | 5.0E-01 | 7.6E-02 | 1.4E-01 | 5.1E-01 |
| GO:0045767 | GO:Bio L4  | regulation of anti-apoptosis                          | 5.3E-01 | 1.2E-01 | 2.0E-01 | 1.8E-01 | 1.4E-01 | 8.3E-01 | 1.5E-01 | 6.9E-01 | 2.7E-01 | 3.4E-01 | 1.4E-01 | 3.9E-01 |
| GO:0070572 | GO:Bio L4  | positive regulation of neuron projection regeneration | 5.1E-01 | 6.7E-01 | 5.4E-01 | 6.8E-01 | 1.4E-01 | 2.8E-01 | 5.8E-02 | 3.2E-01 | 2.6E-01 | 5.0E-01 | 1.4E-01 | 5.5E-01 |
| GO:0019898 | GO:Cell L4 | extrinsic to membrane                                 | 4.5E-01 | 4.7E-01 | 2.3E-01 | 7.2E-02 | 4.0E-01 | 3.3E-01 | 1.4E-01 | 7.6E-01 | 4.9E-01 | 4.4E-01 | 1.4E-01 | 2.2E-01 |
| GO:0031240 | GO:Cell L4 | external side of cell outer membrane                  | 9.7E-01 | 9.9E-01 | 8.1E-01 | 7.4E-01 | 1.4E-01 | 2.4E-02 | 3.9E-02 | 8.9E-01 | 4.2E-01 | 1.1E-01 | 1.4E-01 | 9.3E-01 |
| GO:0007163 | GO:Bio L4  | establishment or maintenance of cell polarity         | 3.1E-01 | 4.5E-01 | 6.4E-01 | 6.1E-01 | 5.9E-01 | 4.7E-01 | 4.9E-02 | 8.7E-01 | 4.9E-01 | 5.4E-01 | 1.4E-01 | 8.7E-01 |
| GO:0050900 | GO:Bio L4  | leukocyte migration                                   | 1.2E-01 | 1.5E-01 | 4.2E-02 | 2.7E-02 | 2.8E-02 | 2.6E-01 | 7.5E-01 | 3.0E-01 | 2.3E-02 | 1.7E-01 | 1.4E-01 | 4.7E-02 |
| GO:0051124 | GO:Bio L4  | synaptic growth at neuromuscular junction             | 1.3E-02 | 3.5E-02 | 3.5E-02 | 1.3E-01 | 9.4E-01 | 8.6E-01 | 8.9E-01 | 1.9E-01 | 6.7E-02 | 1.3E-01 | 1.4E-01 | 1.2E-01 |
| GO:0043209 | GO:Cell L4 | myelin sheath                                         | 6.6E-01 | 3.5E-01 | 3.8E-01 | 6.1E-02 | 2.3E-01 | 4.6E-02 | 8.2E-02 | 1.0E+00 | 4.4E-01 | 8.3E-02 | 1.4E-01 | 2.3E-01 |
| 480        | KEGG       | Glutathione metabolism                                | 1.9E-01 | 5.7E-01 | 4.3E-01 | 6.6E-01 | 5.3E-01 | 2.2E-01 | 7.4E-02 | 2.6E-01 | 3.3E-01 | 3.9E-01 | 1.4E-01 | 4.7E-01 |
| GO:0034986 | GO:Mole L4 | iron chaperone activity                               | 8.0E-01 | 8.6E-01 | 5.3E-01 | 4.3E-01 | 5.4E-01 | 7.4E-01 | 6.0E-02 | 2.2E-02 | 7.9E-01 | 9.2E-01 | 1.4E-01 | 5.4E-02 |
| GO:0023036 | GO:Bio L4  | initiation of signal transduction                     | 4.8E-01 | 6.1E-01 | 4.6E-01 | 4.2E-01 | 2.5E-01 | 6.8E-01 | 6.9E-02 | 8.4E-01 | 3.8E-01 | 7.8E-01 | 1.4E-01 | 7.2E-01 |
| GO:0023038 | GO:Bio L4  | signal initiation by diffusible mediator              | 4.8E-01 | 6.1E-01 | 4.6E-01 | 4.2E-01 | 2.5E-01 | 6.8E-01 | 6.9E-02 | 8.4E-01 | 3.8E-01 | 7.8E-01 | 1.4E-01 | 7.2E-01 |
| GO:0007289 | GO:Bio L4  | spermatid nucleus differentiation                     | 2.6E-01 | 2.3E-01 | 3.6E-01 | 4.6E-01 | 5.8E-01 | 4.8E-01 | 8.9E-02 | 4.3E-01 | 4.3E-01 | 3.5E-01 | 1.4E-01 | 5.1E-01 |
| 260        | KEGG       | Glycine, serine and threonine metabolism              | 7.6E-01 | 5.1E-01 | 6.8E-02 | 1.3E-02 | 2.5E-01 | 3.2E-01 | 4.8E-01 | 6.5E-01 | 5.1E-01 | 4.6E-01 | 1.4E-01 | 4.8E-02 |
| GO:0012506 | GO:Cell L4 | vesicle membrane                                      | 9.9E-01 | 9.7E-01 | 7.3E-01 | 5.9E-01 | 5.8E-01 | 4.1E-01 | 4.4E-02 | 2.5E-01 | 8.9E-01 | 7.6E-01 | 1.4E-01 | 4.3E-01 |
| GO:0060324 | GO:Bio L4  | face development                                      | 1.9E-01 | 3.9E-01 | 9.5E-02 | 9.9E-02 | 8.2E-01 | 8.5E-01 | 3.4E-01 | 5.2E-01 | 4.4E-01 | 6.9E-01 | 1.4E-01 | 2.0E-01 |
| GO:0016817 | GO:Mole L4 | hydrolase activity, acting on acid anhydrides         | 5.5E-02 | 2.7E-02 | 3.3E-01 | 1.4E-01 | 8.2E-01 | 5.4E-01 | 9.8E-02 | 7.6E-01 | 1.9E-01 | 7.7E-02 | 1.4E-01 | 3.5E-01 |
| GO:0048199 | GO:Bio L4  | vesicle targeting, to, from or within Golgi           | 9.6E-01 | 9.5E-01 | 6.7E-01 | 6.1E-01 | 4.4E-01 | 4.5E-01 | 4.8E-02 | 9.3E-01 | 7.9E-01 | 7.9E-01 | 1.4E-01 | 8.9E-01 |
| GO:0031645 | GO:Bio L4  | negative regulation of neurological system process    | 2.5E-02 | 1.2E-01 | 5.0E-02 | 9.0E-02 | 8.1E-02 | 1.7E-01 | 6.5E-01 | 6.5E-01 | 1.4E-02 | 9.9E-02 | 1.4E-01 | 2.3E-01 |
| 5211       | KEGG       | Renal cell carcinoma                                  | 9.0E-02 | 5.3E-01 | 4.6E-01 | 7.8E-01 | 3.5E-01 | 4.2E-01 | 7.0E-02 | 6.0E-02 | 1.4E-01 | 5.5E-01 | 1.4E-01 | 1.9E-01 |
| GO:0005542 | GO:Mole L4 | folic acid binding                                    | 5.9E-01 | 9.3E-01 | 5.2E-02 | 2.2E-02 | 7.9E-01 | 4.8E-01 | 6.2E-01 | 3.7E-02 | 8.2E-01 | 8.0E-01 | 1.4E-01 | 6.7E-03 |
| GO:0034641 | GO:Bio L4  | cellular nitrogen compound metabolic process          | 3.9E-01 | 3.1E-01 | 1.1E-01 | 8.4E-02 | 1.1E-01 | 4.0E-01 | 3.0E-01 | 1.3E-01 | 1.8E-01 | 3.9E-01 | 1.4E-01 | 5.9E-02 |

|            |            |                                                             |         |         |         |         |         |         |         |         |         |         |         |         |
|------------|------------|-------------------------------------------------------------|---------|---------|---------|---------|---------|---------|---------|---------|---------|---------|---------|---------|
| GO:0032835 | GO:Bio L4  | glomerulus development                                      | 5.5E-02 | 1.0E-01 | 4.7E-01 | 5.3E-01 | 1.6E-01 | 1.9E-02 | 6.8E-02 | 7.0E-01 | 5.0E-02 | 1.4E-02 | 1.4E-01 | 7.4E-01 |
| GO:0017076 | GO:Mole L4 | purine nucleotide binding                                   | 5.6E-02 | 6.1E-03 | 2.2E-01 | 3.7E-01 | 9.7E-01 | 5.3E-01 | 1.5E-01 | 3.5E-01 | 2.1E-01 | 2.2E-02 | 1.4E-01 | 3.9E-01 |
| GO:0051379 | GO:Mole L4 | epinephrine binding                                         | 8.9E-01 | 1.0E+00 | 3.7E-02 | 9.2E-02 | 4.2E-01 | 1.1E-01 | 8.8E-01 | 4.0E-01 | 7.4E-01 | 3.5E-01 | 1.4E-01 | 1.6E-01 |
| 4640       | KEGG       | Hematopoietic cell lineage                                  | 3.1E-01 | 1.6E-01 | 7.0E-02 | 3.6E-02 | 9.7E-01 | 5.2E-01 | 4.6E-01 | 3.2E-01 | 6.6E-01 | 2.9E-01 | 1.4E-01 | 6.4E-02 |
| GO:0009266 | GO:Bio L4  | response to temperature stimulus                            | 2.7E-01 | 1.5E-01 | 2.9E-01 | 3.2E-01 | 8.3E-01 | 8.5E-01 | 1.1E-01 | 5.5E-01 | 5.6E-01 | 3.9E-01 | 1.4E-01 | 4.8E-01 |
| GO:0060560 | GO:Bio L4  | developmental growth involved in morphogenesis              | 4.8E-01 | 4.0E-01 | 8.0E-02 | 7.7E-02 | 8.1E-02 | 5.4E-02 | 4.1E-01 | 6.1E-01 | 1.7E-01 | 1.1E-01 | 1.4E-01 | 1.9E-01 |
| GO:0016192 | GO:Bio L4  | vesicle-mediated transport                                  | 7.9E-01 | 8.0E-02 | 1.8E-01 | 5.0E-02 | 3.5E-01 | 3.3E-01 | 1.8E-01 | 8.6E-01 | 6.3E-01 | 1.2E-01 | 1.4E-01 | 1.8E-01 |
| GO:0044282 | GO:Bio L4  | small molecule catabolic process                            | 5.9E-01 | 5.3E-01 | 2.8E-01 | 2.8E-01 | 3.3E-01 | 1.0E-01 | 1.2E-01 | 2.7E-01 | 5.1E-01 | 2.1E-01 | 1.4E-01 | 2.7E-01 |
| GO:0010035 | GO:Bio L4  | response to inorganic substance                             | 9.0E-01 | 5.9E-01 | 2.9E-01 | 2.2E-01 | 4.5E-01 | 6.5E-01 | 1.1E-01 | 4.4E-01 | 7.7E-01 | 7.6E-01 | 1.4E-01 | 3.3E-01 |
| GO:0040013 | GO:Bio L4  | negative regulation of locomotion                           | 1.9E-02 | 5.4E-03 | 3.6E-02 | 4.4E-02 | 3.5E-02 | 3.9E-01 | 9.2E-01 | 6.2E-01 | 5.5E-03 | 1.5E-02 | 1.5E-01 | 1.2E-01 |
| GO:0001547 | GO:Bio L4  | antral ovarian follicle growth                              | 3.0E-01 | 3.6E-01 | 5.4E-01 | 4.3E-01 | 2.8E-01 | 2.6E-01 | 6.1E-02 | 3.1E-02 | 2.9E-01 | 3.1E-01 | 1.5E-01 | 7.2E-02 |
| GO:0001708 | GO:Bio L4  | cell fate specification                                     | 6.0E-01 | 4.1E-01 | 9.5E-02 | 1.1E-01 | 3.7E-01 | 5.8E-01 | 3.5E-01 | 7.5E-01 | 5.5E-01 | 5.8E-01 | 1.5E-01 | 2.9E-01 |
| 410        | KEGG       | beta-Alanine metabolism                                     | 6.8E-01 | 4.3E-01 | 2.9E-01 | 1.3E-01 | 1.8E-01 | 3.8E-01 | 1.1E-01 | 1.6E-01 | 3.8E-01 | 4.6E-01 | 1.5E-01 | 9.9E-02 |
| GO:0008559 | GO:Mole L4 | xenobiotic-transporting ATPase activity                     | 2.9E-01 | 6.2E-01 | 2.8E-01 | 1.3E-01 | 7.2E-01 | 3.6E-01 | 1.2E-01 | 2.7E-01 | 5.4E-01 | 5.6E-01 | 1.5E-01 | 1.6E-01 |
| GO:0031642 | GO:Bio L4  | negative regulation of myelination                          | 9.0E-03 | 2.4E-02 | 4.2E-02 | 5.3E-02 | 9.8E-01 | 7.2E-01 | 7.9E-01 | 5.4E-01 | 5.0E-02 | 8.6E-02 | 1.5E-01 | 1.3E-01 |
| GO:0021516 | GO:Bio L4  | dorsal spinal cord development                              | 3.1E-01 | 6.3E-01 | 8.9E-02 | 6.8E-02 | 7.9E-01 | 9.6E-01 | 3.7E-01 | 5.7E-01 | 5.9E-01 | 9.1E-01 | 1.5E-01 | 1.6E-01 |
| GO:0070444 | GO:Bio L4  | oligodendrocyte progenitor proliferation                    | 5.0E-01 | 9.1E-01 | 2.0E-01 | 1.4E-01 | 4.4E-01 | 9.4E-01 | 1.7E-01 | 8.8E-01 | 5.5E-01 | 9.9E-01 | 1.5E-01 | 3.7E-01 |
| GO:0002039 | GO:Mole L4 | p53 binding                                                 | 3.5E-01 | 4.6E-01 | 3.1E-01 | 2.7E-01 | 2.9E-01 | 4.2E-01 | 1.1E-01 | 5.5E-01 | 3.3E-01 | 5.1E-01 | 1.5E-01 | 4.3E-01 |
| GO:0031937 | GO:Bio L4  | positive regulation of chromatin silencing                  | 7.2E-01 | 2.9E-01 | 9.8E-02 | 1.2E-01 | 7.4E-01 | 6.5E-01 | 3.5E-01 | 6.5E-01 | 8.7E-01 | 5.0E-01 | 1.5E-01 | 2.7E-01 |
| GO:0032144 | GO:Cell L4 | 4-aminobutyrate transaminase complex                        | 1.8E-01 | 8.8E-02 | 6.0E-02 | 5.1E-02 | 1.4E-01 | 2.8E-02 | 5.7E-01 | 2.5E-01 | 1.2E-01 | 1.7E-02 | 1.5E-01 | 6.9E-02 |
| GO:0005095 | GO:Mole L4 | GTPase inhibitor activity                                   | 1.4E-01 | 8.5E-02 | 1.9E-01 | 7.7E-02 | 4.8E-01 | 1.4E-01 | 1.8E-01 | 9.7E-01 | 2.5E-01 | 6.5E-02 | 1.5E-01 | 2.7E-01 |
| GO:0003717 | GO:Mole L4 | RNA polymerase II transcription termination factor activity | 9.6E-01 | 8.3E-01 | 1.5E-01 | 1.6E-01 | 1.6E-01 | 7.2E-01 | 2.4E-01 | 8.8E-01 | 4.4E-01 | 9.0E-01 | 1.5E-01 | 4.1E-01 |

|            |            |                                                                 |         |         |         |         |         |         |         |         |         |         |         |         |
|------------|------------|-----------------------------------------------------------------|---------|---------|---------|---------|---------|---------|---------|---------|---------|---------|---------|---------|
| GO:0055021 | GO:Bio L4  | regulation of cardiac muscle tissue growth                      | 2.3E-02 | 8.8E-02 | 6.2E-01 | 7.7E-01 | 1.0E-01 | 3.2E-01 | 5.5E-02 | 2.6E-01 | 1.7E-02 | 1.3E-01 | 1.5E-01 | 5.2E-01 |
| GO:0060343 | GO:Bio L4  | trabecula formation                                             | 8.1E-01 | 7.8E-01 | 6.6E-02 | 7.2E-02 | 8.8E-01 | 8.6E-01 | 5.2E-01 | 3.5E-01 | 9.6E-01 | 9.4E-01 | 1.5E-01 | 1.2E-01 |
| GO:0050878 | GO:Bio L4  | regulation of body fluid levels                                 | 3.2E-01 | 1.7E-01 | 7.2E-02 | 2.8E-02 | 7.3E-02 | 5.7E-01 | 4.8E-01 | 9.4E-01 | 1.1E-01 | 3.2E-01 | 1.5E-01 | 1.2E-01 |
| GO:0030730 | GO:Bio L4  | sequestering of triglyceride                                    | 2.5E-01 | 1.2E-01 | 3.8E-01 | 2.8E-01 | 6.8E-01 | 5.4E-01 | 9.1E-02 | 4.5E-01 | 4.7E-01 | 2.4E-01 | 1.5E-01 | 3.9E-01 |
| GO:0002517 | GO:Bio L4  | T cell tolerance induction                                      | 1.2E-01 | 2.0E-01 | 7.8E-02 | 1.6E-01 | 8.7E-01 | 9.4E-01 | 4.5E-01 | 3.8E-02 | 3.3E-01 | 5.0E-01 | 1.5E-01 | 3.7E-02 |
| GO:0030881 | GO:Mole L4 | beta-2-microglobulin binding                                    | 5.1E-01 | 3.3E-01 | 9.9E-02 | 1.0E-01 | 4.5E-01 | 1.5E-01 | 3.5E-01 | 8.4E-02 | 5.7E-01 | 2.0E-01 | 1.5E-01 | 5.0E-02 |
| GO:0001817 | GO:Bio L4  | regulation of cytokine production                               | 5.2E-01 | 5.4E-01 | 5.5E-01 | 1.9E-01 | 4.1E-01 | 4.0E-01 | 6.3E-02 | 2.7E-01 | 5.4E-01 | 5.4E-01 | 1.5E-01 | 2.1E-01 |
| GO:0010522 | GO:Bio L4  | regulation of calcium ion transport into cytosol                | 2.9E-01 | 1.5E-01 | 1.2E-01 | 2.0E-01 | 9.6E-02 | 2.5E-01 | 2.8E-01 | 1.7E-01 | 1.3E-01 | 1.6E-01 | 1.5E-01 | 1.5E-01 |
| 4950       | KEGG       | Maturity onset diabetes of the young                            | 4.4E-01 | 5.5E-01 | 2.2E-01 | 2.4E-01 | 9.4E-01 | 5.6E-01 | 1.6E-01 | 2.2E-01 | 7.8E-01 | 6.7E-01 | 1.5E-01 | 2.1E-01 |
| PA2026     | PharmGKB   | pgkb_pwy_Glucocorticoid_and_Inflammatory_genes_Pathway_HPA_axis | 7.5E-01 | 9.6E-01 | 6.5E-02 | 2.0E-01 | 7.9E-01 | 4.8E-01 | 5.4E-01 | 4.4E-01 | 9.0E-01 | 8.2E-01 | 1.5E-01 | 3.0E-01 |
| GO:0022604 | GO:Bio L4  | regulation of cell morphogenesis                                | 5.2E-01 | 3.1E-01 | 4.1E-01 | 2.1E-01 | 4.1E-01 | 7.9E-01 | 8.6E-02 | 7.1E-01 | 5.5E-01 | 5.9E-01 | 1.5E-01 | 4.3E-01 |
| GO:0008280 | GO:Cell L4 | cohesin core heterodimer                                        | 4.6E-01 | 5.1E-01 | 1.2E-01 | 1.4E-01 | 9.4E-01 | 7.7E-01 | 2.9E-01 | 4.5E-01 | 7.9E-01 | 7.6E-01 | 1.5E-01 | 2.4E-01 |
| GO:0043473 | GO:Bio L2  | pigmentation                                                    | 1.9E-02 | 1.3E-03 | 1.0E-01 | 4.0E-02 | 5.6E-01 | 3.8E-01 | 3.5E-01 | 5.9E-01 | 6.0E-02 | 4.3E-03 | 1.5E-01 | 1.1E-01 |
| GO:0048630 | GO:Bio L4  | skeletal muscle tissue growth                                   | 6.5E-02 | 2.2E-02 | 9.3E-02 | 2.3E-01 | 5.0E-01 | 9.6E-01 | 3.8E-01 | 4.0E-01 | 1.5E-01 | 1.0E-01 | 1.5E-01 | 3.1E-01 |
| GO:0040001 | GO:Bio L4  | establishment of mitotic spindle localization                   | 6.2E-02 | 1.4E-01 | 1.9E-01 | 1.8E-01 | 7.0E-01 | 6.9E-01 | 1.8E-01 | 6.9E-01 | 1.8E-01 | 3.3E-01 | 1.5E-01 | 3.9E-01 |
| GO:0016441 | GO:Bio L4  | posttranscriptional gene silencing                              | 2.7E-01 | 4.3E-01 | 3.5E-01 | 3.2E-01 | 7.2E-01 | 4.6E-01 | 1.0E-01 | 9.0E-01 | 5.1E-01 | 5.2E-01 | 1.5E-01 | 6.4E-01 |
| GO:0005504 | GO:Mole L4 | fatty acid binding                                              | 6.4E-01 | 9.4E-01 | 7.8E-01 | 7.4E-01 | 2.7E-01 | 1.3E-01 | 4.5E-02 | 3.6E-01 | 4.7E-01 | 3.7E-01 | 1.5E-01 | 6.2E-01 |
| GO:0001846 | GO:Mole L4 | opsonin binding                                                 | 6.8E-01 | 2.9E-01 | 4.0E-01 | 2.4E-01 | 1.1E-01 | 2.7E-01 | 9.0E-02 | 3.0E-01 | 2.7E-01 | 2.8E-01 | 1.5E-01 | 2.6E-01 |
| GO:0010171 | GO:Bio L4  | body morphogenesis                                              | 2.7E-01 | 5.1E-01 | 1.4E-01 | 1.5E-01 | 8.2E-01 | 8.3E-01 | 2.6E-01 | 4.5E-01 | 5.6E-01 | 7.9E-01 | 1.5E-01 | 2.4E-01 |
| GO:0002475 | GO:Bio L4  | antigen processing and presentation via MHC class Ib            | 5.2E-01 | 3.4E-01 | 8.7E-02 | 1.1E-01 | 5.0E-01 | 5.1E-01 | 4.1E-01 | 8.8E-02 | 6.1E-01 | 4.7E-01 | 1.5E-01 | 5.4E-02 |
| GO:0016469 | GO:Cell L4 | proton-transporting two-sector ATPase complex                   | 9.2E-01 | 7.2E-01 | 8.4E-01 | 5.3E-01 | 2.0E-01 | 3.0E-01 | 4.3E-02 | 2.8E-01 | 4.9E-01 | 5.4E-01 | 1.6E-01 | 4.3E-01 |

|            |            |                                                          |         |         |         |         |         |         |         |         |         |         |         |         |
|------------|------------|----------------------------------------------------------|---------|---------|---------|---------|---------|---------|---------|---------|---------|---------|---------|---------|
| GO:0030695 | GO:Mole L4 | GTPase regulator activity                                | 3.5E-01 | 6.8E-02 | 2.9E-01 | 3.3E-02 | 9.3E-01 | 6.6E-01 | 1.2E-01 | 7.4E-01 | 7.0E-01 | 1.9E-01 | 1.6E-01 | 1.2E-01 |
| GO:0060322 | GO:Bio L4  | head development                                         | 2.0E-01 | 4.9E-01 | 1.4E-01 | 1.5E-01 | 6.3E-01 | 9.2E-01 | 2.6E-01 | 6.3E-01 | 3.9E-01 | 8.1E-01 | 1.6E-01 | 3.1E-01 |
| GO:0051017 | GO:Bio L4  | actin filament bundle assembly                           | 4.8E-01 | 2.6E-01 | 6.8E-01 | 6.0E-01 | 9.2E-02 | 2.1E-02 | 5.3E-02 | 9.8E-01 | 1.8E-01 | 3.4E-02 | 1.6E-01 | 9.0E-01 |
| 460        | KEGG       | Cyanoamino acid metabolism                               | 2.8E-01 | 5.7E-01 | 1.4E-01 | 2.2E-01 | 5.2E-02 | 9.3E-02 | 2.5E-01 | 6.7E-01 | 7.5E-02 | 2.1E-01 | 1.6E-01 | 4.3E-01 |
| GO:0042089 | GO:Bio L4  | cytokine biosynthetic process                            | 8.2E-01 | 5.3E-01 | 2.9E-01 | 6.2E-02 | 2.2E-01 | 9.4E-02 | 1.2E-01 | 2.3E-01 | 4.9E-01 | 2.0E-01 | 1.6E-01 | 7.5E-02 |
| GO:0005968 | GO:Cell L4 | Rab-protein geranylgeranyltransferase complex            | 4.3E-01 | 1.1E-01 | 1.2E-01 | 1.1E-01 | 2.9E-01 | 8.3E-01 | 3.0E-01 | 4.1E-01 | 3.8E-01 | 3.0E-01 | 1.6E-01 | 1.9E-01 |
| GO:0080135 | GO:Bio L4  | regulation of cellular response to stress                | 4.6E-02 | 3.6E-01 | 2.5E-01 | 2.5E-01 | 2.2E-01 | 1.8E-01 | 1.4E-01 | 1.9E-01 | 5.5E-02 | 2.4E-01 | 1.6E-01 | 2.0E-01 |
| GO:0042127 | GO:Bio L4  | regulation of cell proliferation                         | 2.7E-01 | 2.2E-02 | 5.0E-01 | 4.8E-01 | 1.9E-01 | 4.8E-01 | 7.2E-02 | 2.2E-01 | 2.0E-01 | 5.8E-02 | 1.6E-01 | 3.4E-01 |
| GO:0080134 | GO:Bio L4  | regulation of response to stress                         | 1.4E-01 | 9.8E-02 | 2.6E-01 | 1.9E-01 | 8.0E-02 | 1.3E-01 | 1.4E-01 | 3.3E-01 | 6.2E-02 | 6.9E-02 | 1.6E-01 | 2.4E-01 |
| GO:0005577 | GO:Cell L4 | fibrinogen complex                                       | 1.1E-01 | 2.9E-01 | 5.3E-02 | 2.3E-02 | 1.5E-01 | 2.7E-01 | 6.9E-01 | 6.2E-01 | 8.3E-02 | 2.8E-01 | 1.6E-01 | 7.4E-02 |
| GO:0046813 | GO:Bio L4  | virion attachment, binding of host cell surface receptor | 7.6E-01 | 9.6E-01 | 5.4E-02 | 1.1E-01 | 7.1E-01 | 9.3E-01 | 6.8E-01 | 1.4E-01 | 8.8E-01 | 9.9E-01 | 1.6E-01 | 8.2E-02 |
| GO:0035172 | GO:Bio L4  | hemocyte proliferation                                   | 3.9E-02 | 2.4E-02 | 4.5E-02 | 2.8E-02 | 8.6E-01 | 9.4E-01 | 8.3E-01 | 6.4E-01 | 1.5E-01 | 1.1E-01 | 1.6E-01 | 9.0E-02 |
| GO:0033593 | GO:Cell L4 | BRCA2-MAGE-D1 complex                                    | 3.9E-02 | 2.4E-02 | 4.5E-02 | 2.8E-02 | 8.6E-01 | 9.4E-01 | 8.3E-01 | 6.4E-01 | 1.5E-01 | 1.1E-01 | 1.6E-01 | 9.0E-02 |
| GO:0002061 | GO:Mole L4 | pyrimidine binding                                       | 4.8E-01 | 5.5E-01 | 6.7E-01 | 5.6E-01 | 2.2E-01 | 1.6E-01 | 5.6E-02 | 9.0E-01 | 3.4E-01 | 3.0E-01 | 1.6E-01 | 8.5E-01 |
| GO:0007030 | GO:Bio L4  | Golgi organization                                       | 1.5E-02 | 2.2E-02 | 2.2E-01 | 2.5E-01 | 9.5E-01 | 4.9E-01 | 1.7E-01 | 7.1E-01 | 7.6E-02 | 5.8E-02 | 1.6E-01 | 4.8E-01 |
| GO:0032206 | GO:Bio L4  | positive regulation of telomere maintenance              | 5.4E-01 | 3.0E-01 | 5.4E-01 | 4.3E-01 | 2.8E-01 | 8.5E-01 | 6.8E-02 | 4.3E-02 | 4.3E-01 | 6.1E-01 | 1.6E-01 | 9.1E-02 |
| 3430       | KEGG       | Mismatch repair                                          | 1.7E-03 | 1.7E-03 | 1.8E-01 | 3.1E-01 | 6.8E-01 | 4.6E-01 | 2.0E-01 | 8.2E-01 | 9.0E-03 | 6.4E-03 | 1.6E-01 | 6.0E-01 |
| 4610       | KEGG       | Complement and coagulation cascades                      | 5.6E-01 | 4.7E-01 | 8.3E-02 | 6.3E-02 | 8.9E-02 | 5.7E-01 | 4.5E-01 | 9.5E-01 | 2.0E-01 | 6.2E-01 | 1.6E-01 | 2.3E-01 |
| GO:0051276 | GO:Bio L4  | chromosome organization                                  | 6.6E-01 | 6.7E-01 | 7.3E-01 | 6.2E-01 | 1.3E-01 | 8.1E-02 | 5.1E-02 | 7.4E-01 | 3.0E-01 | 2.1E-01 | 1.6E-01 | 8.2E-01 |
| GO:0010521 | GO:Mole L4 | telomerase inhibitor activity                            | 2.1E-01 | 1.2E-01 | 3.7E-01 | 2.7E-01 | 1.8E-02 | 4.3E-02 | 1.0E-01 | 7.4E-01 | 2.4E-02 | 3.3E-02 | 1.6E-01 | 5.2E-01 |
| GO:0045786 | GO:Bio L4  | negative regulation of cell cycle                        | 8.1E-01 | 9.0E-01 | 8.8E-01 | 7.8E-01 | 4.4E-01 | 5.0E-01 | 4.3E-02 | 3.1E-01 | 7.2E-01 | 8.1E-01 | 1.6E-01 | 5.8E-01 |
| GO:0017025 | GO:Mole L4 | TATA-binding protein binding                             | 9.5E-01 | 7.6E-01 | 1.2E-01 | 7.3E-02 | 4.6E-01 | 6.4E-01 | 3.3E-01 | 6.5E-01 | 8.0E-01 | 8.3E-01 | 1.6E-01 | 1.9E-01 |
| GO:0005581 | GO:Cell L4 | collagen                                                 | 3.3E-02 | 6.8E-02 | 2.2E-01 | 1.5E-01 | 8.6E-01 | 9.8E-01 | 1.7E-01 | 4.0E-01 | 1.3E-01 | 2.5E-01 | 1.6E-01 | 2.3E-01 |
| GO:0051656 | GO:Bio L4  | establishment of organelle localization                  | 4.4E-01 | 1.8E-01 | 9.5E-01 | 8.7E-01 | 4.9E-01 | 2.4E-01 | 4.0E-02 | 4.5E-01 | 5.5E-01 | 1.8E-01 | 1.6E-01 | 7.6E-01 |

|            |            |                                                    |         |         |         |         |         |         |         |         |         |         |         |         |
|------------|------------|----------------------------------------------------|---------|---------|---------|---------|---------|---------|---------|---------|---------|---------|---------|---------|
| GO:0010647 | GO:Bio L4  | positive regulation of cell communication          | 9.0E-02 | 1.7E-02 | 2.2E-01 | 8.1E-02 | 7.3E-02 | 1.3E-01 | 1.8E-01 | 1.6E-01 | 3.9E-02 | 1.5E-02 | 1.6E-01 | 6.8E-02 |
| GO:0033292 | GO:Bio L4  | T-tubule organization                              | 9.4E-01 | 8.5E-01 | 8.8E-01 | 9.0E-01 | 8.2E-01 | 9.1E-01 | 4.3E-02 | 6.6E-01 | 9.7E-01 | 9.7E-01 | 1.6E-01 | 9.0E-01 |
| 4650       | KEGG       | Natural killer cell mediated cytotoxicity          | 3.6E-02 | 1.0E-01 | 2.0E-01 | 4.1E-01 | 6.7E-01 | 2.5E-01 | 1.9E-01 | 7.3E-02 | 1.1E-01 | 1.2E-01 | 1.6E-01 | 1.4E-01 |
| GO:0031984 | GO:Cell L4 | organelle subcompartment                           | 4.1E-01 | 1.4E-01 | 7.1E-02 | 1.5E-01 | 5.0E-01 | 1.7E-01 | 5.4E-01 | 9.6E-01 | 5.3E-01 | 1.1E-01 | 1.6E-01 | 4.2E-01 |
| GO:0035176 | GO:Bio L4  | social behavior                                    | 9.0E-01 | 8.2E-01 | 1.2E-01 | 7.8E-02 | 6.4E-01 | 7.6E-01 | 3.2E-01 | 6.4E-01 | 8.9E-01 | 9.2E-01 | 1.6E-01 | 2.0E-01 |
| GO:0051271 | GO:Bio L4  | negative regulation of cellular component movement | 2.4E-02 | 7.5E-03 | 4.2E-02 | 5.1E-02 | 4.0E-02 | 5.1E-01 | 9.0E-01 | 5.7E-01 | 7.5E-03 | 2.5E-02 | 1.6E-01 | 1.3E-01 |
| GO:0019213 | GO:Mole L4 | deacetylase activity                               | 4.9E-01 | 5.6E-01 | 1.1E-01 | 4.7E-02 | 5.6E-01 | 5.4E-01 | 3.5E-01 | 8.8E-01 | 6.3E-01 | 6.7E-01 | 1.6E-01 | 1.7E-01 |
| GO:0022038 | GO:Bio L4  | corpus callosum development                        | 2.1E-01 | 1.4E-01 | 3.9E-02 | 5.1E-02 | 7.5E-01 | 8.7E-01 | 9.9E-01 | 1.7E-01 | 4.4E-01 | 3.9E-01 | 1.6E-01 | 5.1E-02 |
| GO:0010883 | GO:Bio L4  | regulation of lipid storage                        | 1.6E-01 | 2.1E-01 | 4.9E-01 | 3.1E-01 | 3.0E-01 | 5.2E-01 | 7.9E-02 | 8.4E-01 | 1.9E-01 | 3.6E-01 | 1.6E-01 | 6.1E-01 |
| GO:0033293 | GO:Mole L4 | monocarboxylic acid binding                        | 7.5E-01 | 8.4E-01 | 9.1E-01 | 8.9E-01 | 3.3E-01 | 2.4E-01 | 4.3E-02 | 3.6E-01 | 5.9E-01 | 5.3E-01 | 1.6E-01 | 6.9E-01 |
| GO:0042720 | GO:Cell L4 | mitochondrial inner membrane peptidase complex     | 6.7E-01 | 5.8E-01 | 4.8E-01 | 5.7E-01 | 3.5E-01 | 3.0E-01 | 8.0E-02 | 5.6E-01 | 5.7E-01 | 4.8E-01 | 1.6E-01 | 6.8E-01 |
| GO:0016011 | GO:Cell L4 | dystroglycan complex                               | 2.6E-01 | 3.1E-01 | 2.1E-01 | 1.9E-01 | 4.5E-01 | 3.1E-01 | 1.8E-01 | 7.8E-02 | 3.7E-01 | 3.2E-01 | 1.6E-01 | 7.8E-02 |
| 3060       | KEGG       | Protein export                                     | 5.9E-01 | 6.5E-01 | 1.1E-01 | 4.2E-01 | 4.4E-01 | 9.1E-01 | 3.6E-01 | 8.7E-01 | 6.1E-01 | 9.1E-01 | 1.6E-01 | 7.3E-01 |
| GO:0051589 | GO:Bio L4  | negative regulation of neurotransmitter transport  | 2.1E-01 | 2.4E-01 | 6.1E-02 | 7.6E-02 | 1.2E-02 | 8.3E-03 | 6.4E-01 | 4.6E-01 | 1.7E-02 | 1.4E-02 | 1.7E-01 | 1.5E-01 |
| GO:0007506 | GO:Bio L4  | gonadal mesoderm development                       | 6.4E-01 | 3.9E-01 | 1.7E-01 | 2.4E-01 | 7.5E-01 | 9.5E-01 | 2.4E-01 | 2.1E-01 | 8.3E-01 | 7.4E-01 | 1.7E-01 | 2.0E-01 |
| GO:0001659 | GO:Bio L4  | temperature homeostasis                            | 2.1E-01 | 4.8E-02 | 9.3E-02 | 2.0E-01 | 9.0E-02 | 4.0E-01 | 4.2E-01 | 4.1E-01 | 9.3E-02 | 9.5E-02 | 1.7E-01 | 2.9E-01 |
| GO:0001833 | GO:Bio L4  | inner cell mass cell proliferation                 | 1.9E-01 | 9.4E-02 | 2.1E-01 | 1.6E-01 | 9.5E-01 | 9.9E-01 | 1.8E-01 | 9.2E-01 | 4.9E-01 | 3.1E-01 | 1.7E-01 | 4.2E-01 |
| GO:0031256 | GO:Cell L4 | leading edge membrane                              | 7.7E-01 | 7.9E-01 | 2.6E-01 | 3.4E-01 | 2.5E-02 | 5.5E-02 | 1.5E-01 | 5.4E-01 | 9.6E-02 | 1.8E-01 | 1.7E-01 | 4.9E-01 |
| GO:0008431 | GO:Mole L4 | vitamin E binding                                  | 2.6E-01 | 3.7E-01 | 1.5E-01 | 1.9E-01 | 5.8E-01 | 7.4E-01 | 2.6E-01 | 5.0E-01 | 4.4E-01 | 6.2E-01 | 1.7E-01 | 3.1E-01 |
| GO:0046668 | GO:Bio L4  | regulation of retinal cell programmed cell death   | 3.0E-01 | 6.4E-01 | 3.2E-01 | 3.6E-01 | 1.0E-01 | 1.5E-01 | 1.2E-01 | 2.3E-01 | 1.4E-01 | 3.2E-01 | 1.7E-01 | 2.9E-01 |
| GO:0016044 | GO:Bio L4  | cellular membrane organization                     | 6.0E-01 | 1.3E-01 | 1.9E-01 | 9.2E-02 | 5.7E-01 | 4.3E-01 | 2.1E-01 | 8.6E-01 | 7.1E-01 | 2.2E-01 | 1.7E-01 | 2.8E-01 |
| 3450       | KEGG       | Non-homologous end-joining                         | 8.8E-01 | 7.5E-01 | 5.5E-01 | 6.9E-01 | 8.6E-01 | 3.8E-01 | 7.2E-02 | 7.7E-01 | 9.7E-01 | 6.4E-01 | 1.7E-01 | 8.6E-01 |
| 330        | KEGG       | Arginine and proline metabolism                    | 5.5E-01 | 2.5E-01 | 7.1E-01 | 7.3E-01 | 1.2E-01 | 2.5E-01 | 5.5E-02 | 4.2E-01 | 2.5E-01 | 2.3E-01 | 1.7E-01 | 6.7E-01 |

|            |            |                                                         |         |         |         |         |         |         |         |         |         |         |         |         |
|------------|------------|---------------------------------------------------------|---------|---------|---------|---------|---------|---------|---------|---------|---------|---------|---------|---------|
| GO:0034383 | GO:Bio L4  | low-density lipoprotein particle clearance              | 8.9E-01 | 7.7E-01 | 6.9E-01 | 8.3E-01 | 2.4E-01 | 1.4E-01 | 5.7E-02 | 2.1E-01 | 5.4E-01 | 3.4E-01 | 1.7E-01 | 4.8E-01 |
| GO:0007416 | GO:Bio L4  | synapse assembly                                        | 2.2E-01 | 1.8E-01 | 1.6E-01 | 2.1E-01 | 8.5E-01 | 9.1E-01 | 2.5E-01 | 2.3E-01 | 5.0E-01 | 4.5E-01 | 1.7E-01 | 1.9E-01 |
| GO:0051090 | GO:Bio L4  | regulation of transcription factor activity             | 4.4E-01 | 2.6E-01 | 9.0E-02 | 1.3E-02 | 7.2E-01 | 2.0E-01 | 4.5E-01 | 8.4E-02 | 6.8E-01 | 2.1E-01 | 1.7E-01 | 8.5E-03 |
| GO:0090046 | GO:Bio L4  | regulation of transcription regulator activity          | 4.4E-01 | 2.6E-01 | 9.0E-02 | 1.3E-02 | 7.2E-01 | 2.0E-01 | 4.5E-01 | 8.4E-02 | 6.8E-01 | 2.1E-01 | 1.7E-01 | 8.5E-03 |
| GO:0000155 | GO:Mole L4 | two-component sensor activity                           | 3.4E-01 | 5.3E-01 | 6.2E-01 | 6.1E-01 | 5.0E-01 | 4.5E-01 | 6.5E-02 | 5.7E-01 | 4.7E-01 | 5.8E-01 | 1.7E-01 | 7.2E-01 |
| GO:0016358 | GO:Bio L4  | dendrite development                                    | 3.4E-01 | 1.2E-01 | 1.3E-01 | 2.2E-01 | 1.3E-01 | 2.0E-01 | 3.0E-01 | 4.4E-01 | 1.8E-01 | 1.2E-01 | 1.7E-01 | 3.2E-01 |
| GO:0000095 | GO:Mole L4 | S-adenosylmethionine transmembrane transporter activity | 8.1E-01 | 7.6E-01 | 5.3E-01 | 5.4E-01 | 6.5E-01 | 6.7E-01 | 7.6E-02 | 8.2E-02 | 8.7E-01 | 8.5E-01 | 1.7E-01 | 1.8E-01 |
| 232        | KEGG       | Caffeine metabolism                                     | 4.3E-01 | 2.3E-01 | 5.1E-01 | 2.4E-01 | 2.3E-01 | 5.5E-01 | 7.9E-02 | 1.6E-01 | 3.2E-01 | 3.9E-01 | 1.7E-01 | 1.6E-01 |
| GO:0070064 | GO:Mole L4 | proline-rich region binding                             | 9.0E-01 | 5.5E-01 | 5.0E-01 | 5.0E-01 | 4.1E-01 | 5.5E-01 | 8.0E-02 | 8.2E-01 | 7.3E-01 | 6.6E-01 | 1.7E-01 | 7.7E-01 |
| GO:0012505 | GO:Cell L4 | endomembrane system                                     | 6.6E-01 | 2.9E-01 | 5.4E-01 | 4.8E-01 | 5.5E-01 | 2.9E-01 | 7.5E-02 | 4.4E-01 | 7.3E-01 | 2.9E-01 | 1.7E-01 | 5.4E-01 |
| GO:0051049 | GO:Bio L4  | regulation of transport                                 | 1.8E-01 | 3.0E-04 | 3.2E-01 | 2.6E-01 | 2.3E-01 | 3.8E-01 | 1.3E-01 | 5.3E-01 | 1.7E-01 | 1.1E-03 | 1.7E-01 | 4.1E-01 |
| GO:0021544 | GO:Bio L4  | subpallium development                                  | 3.0E-01 | 9.0E-02 | 1.1E-01 | 8.2E-02 | 4.7E-01 | 7.2E-01 | 3.6E-01 | 8.9E-01 | 4.1E-01 | 2.4E-01 | 1.7E-01 | 2.6E-01 |
| GO:0060041 | GO:Bio L4  | retina development in camera-type eye                   | 9.0E-01 | 4.6E-01 | 6.4E-01 | 8.6E-01 | 1.1E-01 | 1.5E-01 | 6.3E-02 | 9.9E-01 | 3.3E-01 | 2.6E-01 | 1.7E-01 | 9.9E-01 |
| 340        | KEGG       | Histidine metabolism                                    | 2.6E-01 | 2.1E-01 | 7.5E-02 | 2.9E-01 | 4.1E-01 | 3.5E-01 | 5.4E-01 | 4.8E-01 | 3.4E-01 | 2.7E-01 | 1.7E-01 | 4.1E-01 |
| GO:0016010 | GO:Cell L4 | dystrophin-associated glycoprotein complex              | 6.4E-01 | 7.2E-01 | 1.5E-01 | 9.7E-02 | 6.1E-01 | 5.8E-01 | 2.7E-01 | 1.5E-01 | 7.6E-01 | 7.8E-01 | 1.7E-01 | 7.7E-02 |
| 520        | KEGG       | Amino sugar and nucleotide sugar metabolism             | 3.3E-01 | 4.9E-01 | 3.3E-01 | 2.6E-01 | 1.5E-01 | 1.7E-01 | 1.2E-01 | 1.6E-01 | 2.0E-01 | 2.9E-01 | 1.7E-01 | 1.7E-01 |
| GO:0000278 | GO:Bio L4  | mitotic cell cycle                                      | 2.6E-01 | 1.9E-01 | 6.6E-01 | 5.9E-01 | 6.9E-01 | 2.6E-01 | 6.3E-02 | 8.8E-01 | 4.9E-01 | 1.9E-01 | 1.7E-01 | 8.6E-01 |
| GO:0004383 | GO:Mole L4 | guanylate cyclase activity                              | 3.8E-01 | 6.2E-01 | 7.1E-01 | 6.4E-01 | 2.6E-01 | 1.7E-01 | 5.8E-02 | 2.5E-01 | 3.3E-01 | 3.4E-01 | 1.7E-01 | 4.6E-01 |
| GO:0021758 | GO:Bio L4  | putamen development                                     | 1.7E-01 | 4.0E-02 | 7.7E-01 | 7.1E-01 | 7.9E-01 | 9.8E-01 | 5.4E-02 | 7.5E-01 | 4.1E-01 | 1.7E-01 | 1.7E-01 | 8.7E-01 |
| 512        | KEGG       | O-Glycan biosynthesis                                   | 4.8E-01 | 3.4E-01 | 5.5E-01 | 6.2E-01 | 7.1E-01 | 5.6E-01 | 7.6E-02 | 6.3E-01 | 7.1E-01 | 5.0E-01 | 1.7E-01 | 7.6E-01 |
| GO:0019067 | GO:Bio L4  | viral assembly, maturation, egress, and release         | 5.9E-01 | 9.0E-01 | 6.5E-01 | 4.0E-01 | 9.4E-01 | 7.3E-01 | 6.4E-02 | 7.2E-01 | 8.8E-01 | 9.3E-01 | 1.7E-01 | 6.5E-01 |
| 970        | KEGG       | Aminoacyl-tRNA biosynthesis                             | 5.6E-01 | 7.4E-01 | 8.0E-01 | 7.6E-01 | 6.7E-01 | 2.8E-01 | 5.3E-02 | 6.5E-01 | 7.4E-01 | 5.3E-01 | 1.7E-01 | 8.4E-01 |
| GO:0051240 | GO:Bio L4  | positive regulation of multicellular organismal process | 1.2E-01 | 3.5E-02 | 2.7E-01 | 1.2E-01 | 2.4E-01 | 3.9E-02 | 1.5E-01 | 3.7E-01 | 1.4E-01 | 1.0E-02 | 1.7E-01 | 1.8E-01 |

|            |            |                                                            |         |         |         |         |         |         |         |         |         |         |         |         |
|------------|------------|------------------------------------------------------------|---------|---------|---------|---------|---------|---------|---------|---------|---------|---------|---------|---------|
| PA2032     | PharmGKB   | pgkb_pwy_VEGF_Pathway                                      | 4.7E-01 | 8.3E-01 | 5.8E-01 | 5.9E-01 | 2.4E-01 | 7.7E-01 | 7.2E-02 | 1.5E-01 | 3.6E-01 | 9.2E-01 | 1.7E-01 | 3.1E-01 |
| GO:0008542 | GO:Bio L4  | visual learning                                            | 6.6E-03 | 8.1E-03 | 6.0E-02 | 7.0E-02 | 6.8E-01 | 9.4E-01 | 7.1E-01 | 2.9E-01 | 2.9E-02 | 4.5E-02 | 1.8E-01 | 1.0E-01 |
| GO:0060023 | GO:Bio L4  | soft palate development                                    | 8.2E-02 | 1.6E-01 | 7.4E-02 | 9.0E-02 | 2.9E-01 | 6.3E-01 | 5.7E-01 | 8.9E-01 | 1.1E-01 | 3.3E-01 | 1.8E-01 | 2.8E-01 |
| GO:0016458 | GO:Bio L4  | gene silencing                                             | 6.3E-01 | 6.5E-01 | 4.2E-01 | 4.5E-01 | 7.5E-01 | 8.7E-01 | 1.0E-01 | 9.2E-01 | 8.2E-01 | 8.8E-01 | 1.8E-01 | 7.8E-01 |
| GO:0048524 | GO:Bio L4  | positive regulation of viral reproduction                  | 2.5E-01 | 2.9E-01 | 4.6E-01 | 6.7E-01 | 7.4E-02 | 1.5E-01 | 9.2E-02 | 1.9E-01 | 9.1E-02 | 1.8E-01 | 1.8E-01 | 3.8E-01 |
| GO:0045161 | GO:Bio L4  | neuronal ion channel clustering                            | 9.3E-01 | 4.1E-01 | 3.2E-01 | 1.7E-01 | 7.4E-01 | 4.6E-01 | 1.3E-01 | 3.8E-01 | 9.5E-01 | 5.0E-01 | 1.8E-01 | 2.5E-01 |
| GO:0045739 | GO:Bio L4  | positive regulation of DNA repair                          | 4.4E-01 | 4.5E-01 | 1.2E-01 | 1.5E-01 | 2.5E-02 | 1.0E-01 | 3.5E-01 | 1.4E-01 | 6.0E-02 | 1.9E-01 | 1.8E-01 | 1.0E-01 |
| GO:0032806 | GO:Cell L4 | carboxy-terminal domain protein kinase complex             | 2.8E-01 | 1.7E-01 | 3.8E-01 | 3.8E-01 | 9.8E-01 | 6.1E-01 | 1.1E-01 | 2.0E-01 | 6.3E-01 | 3.5E-01 | 1.8E-01 | 2.7E-01 |
| PA2033     | PharmGKB   | pgkb_pwy_Antiarrhythmic_Drug_Pathways                      | 1.5E-01 | 1.0E-01 | 6.8E-02 | 1.4E-01 | 7.7E-01 | 9.8E-01 | 6.3E-01 | 5.3E-01 | 3.6E-01 | 3.2E-01 | 1.8E-01 | 2.6E-01 |
| GO:0060548 | GO:Bio L4  | negative regulation of cell death                          | 3.3E-01 | 2.0E-01 | 2.0E-01 | 6.3E-02 | 1.5E-01 | 1.8E-01 | 2.1E-01 | 6.8E-01 | 2.0E-01 | 1.5E-01 | 1.8E-01 | 1.8E-01 |
| GO:0002578 | GO:Bio L4  | negative regulation of antigen processing and presentation | 3.6E-01 | 9.9E-02 | 7.1E-02 | 1.8E-02 | 5.2E-01 | 9.3E-01 | 6.1E-01 | 3.7E-01 | 5.0E-01 | 3.1E-01 | 1.8E-01 | 4.0E-02 |
| GO:0071674 | GO:Bio L4  | mononuclear cell migration                                 | 3.6E-01 | 9.9E-02 | 7.1E-02 | 1.8E-02 | 5.2E-01 | 9.3E-01 | 6.1E-01 | 3.7E-01 | 5.0E-01 | 3.1E-01 | 1.8E-01 | 4.0E-02 |
| GO:0060420 | GO:Bio L4  | regulation of heart growth                                 | 2.9E-02 | 1.0E-01 | 6.7E-01 | 8.1E-01 | 1.2E-01 | 3.6E-01 | 6.5E-02 | 3.0E-01 | 2.2E-02 | 1.6E-01 | 1.8E-01 | 5.8E-01 |
| GO:0030119 | GO:Cell L4 | AP-type membrane coat adaptor complex                      | 9.3E-01 | 9.6E-01 | 1.6E-01 | 1.9E-01 | 1.7E-01 | 8.9E-01 | 2.8E-01 | 7.1E-01 | 4.5E-01 | 9.9E-01 | 1.8E-01 | 4.0E-01 |
| GO:0009988 | GO:Bio L4  | cell-cell recognition                                      | 4.2E-01 | 5.6E-01 | 1.4E-01 | 1.8E-01 | 5.3E-01 | 7.6E-01 | 3.1E-01 | 6.4E-01 | 5.6E-01 | 7.9E-01 | 1.8E-01 | 3.7E-01 |
| GO:0046332 | GO:Mole L4 | SMAD binding                                               | 3.0E-01 | 4.4E-01 | 4.7E-01 | 7.2E-01 | 4.6E-01 | 5.1E-01 | 9.3E-02 | 4.5E-01 | 4.1E-01 | 5.6E-01 | 1.8E-01 | 6.9E-01 |
| GO:0008494 | GO:Mole L4 | translation activator activity                             | 2.4E-01 | 2.8E-02 | 9.8E-02 | 7.3E-02 | 8.3E-01 | 4.7E-01 | 4.5E-01 | 7.5E-01 | 5.2E-01 | 7.0E-02 | 1.8E-01 | 2.1E-01 |
| 51         | KEGG       | Fructose and mannose metabolism                            | 2.3E-01 | 2.6E-01 | 9.8E-01 | 9.0E-01 | 2.6E-01 | 6.3E-01 | 4.5E-02 | 1.9E-01 | 2.3E-01 | 4.6E-01 | 1.8E-01 | 4.7E-01 |
| GO:0043368 | GO:Bio L4  | positive T cell selection                                  | 6.2E-01 | 5.5E-01 | 3.7E-01 | 8.1E-01 | 5.0E-01 | 2.0E-01 | 1.2E-01 | 9.9E-01 | 6.7E-01 | 3.5E-01 | 1.8E-01 | 9.8E-01 |
| GO:0015669 | GO:Bio L4  | gas transport                                              | 5.3E-02 | 1.0E-01 | 2.7E-01 | 1.6E-01 | 4.2E-01 | 7.9E-01 | 1.6E-01 | 6.2E-01 | 1.1E-01 | 2.8E-01 | 1.8E-01 | 3.3E-01 |
| GO:0003963 | GO:Mole L4 | RNA-3'-phosphate cyclase activity                          | 7.7E-01 | 7.9E-01 | 5.2E-02 | 8.6E-02 | 3.3E-01 | 3.6E-01 | 8.6E-01 | 2.7E-02 | 6.0E-01 | 6.4E-01 | 1.8E-01 | 1.7E-02 |
| GO:0010193 | GO:Bio L4  | response to ozone                                          | 1.7E-01 | 1.2E-01 | 8.6E-02 | 7.6E-02 | 6.1E-01 | 4.0E-01 | 5.2E-01 | 5.4E-01 | 3.4E-01 | 1.9E-01 | 1.8E-01 | 1.7E-01 |
| GO:0031047 | GO:Bio L4  | gene silencing by RNA                                      | 4.3E-01 | 4.0E-01 | 3.0E-01 | 2.6E-01 | 5.6E-01 | 6.0E-01 | 1.5E-01 | 9.6E-01 | 5.8E-01 | 5.8E-01 | 1.8E-01 | 5.9E-01 |
| 3040       | KEGG       | Spliceosome                                                | 7.9E-01 | 4.4E-01 | 8.8E-01 | 7.0E-01 | 5.5E-01 | 2.1E-01 | 5.1E-02 | 6.8E-01 | 8.0E-01 | 3.1E-01 | 1.8E-01 | 8.3E-01 |
| GO:0034728 | GO:Bio L4  | nucleosome organization                                    | 8.8E-01 | 7.4E-01 | 5.0E-01 | 1.8E-01 | 7.0E-03 | 7.5E-03 | 9.1E-02 | 7.4E-01 | 3.8E-02 | 3.4E-02 | 1.9E-01 | 4.0E-01 |
| GO:0031983 | GO:Cell L4 | vesicle lumen                                              | 6.2E-02 | 5.8E-01 | 2.2E-01 | 3.0E-01 | 7.0E-02 | 4.0E-01 | 2.1E-01 | 7.6E-01 | 2.8E-02 | 5.7E-01 | 1.9E-01 | 5.7E-01 |

|            |            |                                                  |         |         |         |         |         |         |         |         |         |         |         |         |
|------------|------------|--------------------------------------------------|---------|---------|---------|---------|---------|---------|---------|---------|---------|---------|---------|---------|
| GO:0034643 | GO:Bio L4  | mitochondrion localization, microtubule-mediated | 8.3E-01 | 6.6E-01 | 5.6E-01 | 6.0E-01 | 3.9E-02 | 9.5E-02 | 8.1E-02 | 9.2E-01 | 1.4E-01 | 2.4E-01 | 1.9E-01 | 8.8E-01 |
| GO:0051654 | GO:Bio L4  | establishment of mitochondrion localization      | 8.3E-01 | 6.6E-01 | 5.6E-01 | 6.0E-01 | 3.9E-02 | 9.5E-02 | 8.1E-02 | 9.2E-01 | 1.4E-01 | 2.4E-01 | 1.9E-01 | 8.8E-01 |
| GO:0044306 | GO:Cell L4 | neuron projection terminus                       | 3.3E-02 | 2.2E-03 | 5.5E-02 | 1.2E-01 | 1.2E-01 | 1.4E-01 | 8.3E-01 | 6.8E-01 | 2.6E-02 | 2.8E-03 | 1.9E-01 | 2.8E-01 |
| GO:0019773 | GO:Cell L4 | proteasome core complex, alpha-subunit complex   | 3.3E-01 | 2.1E-01 | 6.9E-02 | 1.6E-01 | 5.9E-01 | 2.0E-01 | 6.6E-01 | 5.7E-01 | 5.1E-01 | 1.8E-01 | 1.9E-01 | 3.1E-01 |
| GO:0048167 | GO:Bio L4  | regulation of synaptic plasticity                | 1.6E-01 | 3.0E-01 | 1.6E-01 | 1.7E-01 | 3.3E-02 | 5.8E-03 | 2.9E-01 | 5.2E-01 | 3.3E-02 | 1.3E-02 | 1.9E-01 | 3.0E-01 |
| GO:0035240 | GO:Mole L4 | dopamine binding                                 | 9.1E-02 | 9.7E-03 | 6.8E-02 | 1.0E-01 | 2.8E-01 | 5.0E-01 | 6.8E-01 | 5.7E-01 | 1.2E-01 | 3.0E-02 | 1.9E-01 | 2.3E-01 |
| GO:0009820 | GO:Bio L4  | alkaloid metabolic process                       | 1.1E-01 | 7.6E-02 | 1.1E-01 | 8.7E-02 | 2.1E-01 | 7.2E-01 | 4.3E-01 | 3.3E-01 | 1.1E-01 | 2.1E-01 | 1.9E-01 | 1.3E-01 |
| GO:0032612 | GO:Bio L4  | interleukin-1 production                         | 3.3E-02 | 9.6E-02 | 1.4E-01 | 5.3E-02 | 2.0E-01 | 3.8E-01 | 3.3E-01 | 5.5E-01 | 4.0E-02 | 1.6E-01 | 1.9E-01 | 1.3E-01 |
| GO:0070435 | GO:Cell L4 | Shc-EGFR complex                                 | 4.2E-01 | 2.0E-01 | 7.5E-01 | 4.1E-01 | 3.3E-01 | 2.0E-01 | 6.2E-02 | 1.1E-01 | 4.2E-01 | 1.7E-01 | 1.9E-01 | 1.9E-01 |
| GO:0042168 | GO:Bio L4  | heme metabolic process                           | 2.1E-01 | 6.0E-01 | 1.6E-01 | 2.5E-01 | 7.9E-01 | 5.6E-01 | 2.9E-01 | 2.5E-01 | 4.7E-01 | 7.0E-01 | 1.9E-01 | 2.4E-01 |
| 4540       | KEGG       | Gap junction                                     | 2.0E-01 | 2.2E-01 | 5.1E-01 | 2.7E-01 | 4.6E-01 | 9.4E-01 | 9.1E-02 | 3.5E-01 | 3.1E-01 | 5.4E-01 | 1.9E-01 | 3.2E-01 |
| GO:0045321 | GO:Bio L4  | leukocyte activation                             | 1.4E-01 | 6.5E-02 | 1.6E-01 | 2.1E-01 | 7.2E-01 | 5.4E-01 | 2.9E-01 | 4.9E-01 | 3.3E-01 | 1.5E-01 | 1.9E-01 | 3.4E-01 |
| GO:0051726 | GO:Bio L4  | regulation of cell cycle                         | 6.1E-01 | 3.5E-01 | 8.6E-01 | 8.0E-01 | 7.1E-01 | 5.3E-01 | 5.4E-02 | 9.2E-01 | 7.9E-01 | 5.0E-01 | 1.9E-01 | 9.6E-01 |
| GO:0009374 | GO:Mole L4 | biotin binding                                   | 7.0E-01 | 5.1E-01 | 8.3E-01 | 8.1E-01 | 1.5E-01 | 3.6E-01 | 5.6E-02 | 8.3E-01 | 3.5E-01 | 5.0E-01 | 1.9E-01 | 9.4E-01 |
| GO:0043533 | GO:Mole L4 | inositol 1,3,4,5 tetrakisphosphate binding       | 1.0E-01 | 3.7E-01 | 5.7E-01 | 5.5E-01 | 9.3E-01 | 8.5E-01 | 8.2E-02 | 6.3E-01 | 3.2E-01 | 6.8E-01 | 1.9E-01 | 7.1E-01 |
| GO:0051875 | GO:Bio L4  | pigment granule localization                     | 1.5E-02 | 3.1E-03 | 2.1E-01 | 2.6E-01 | 5.2E-01 | 1.6E-01 | 2.2E-01 | 1.3E-01 | 4.5E-02 | 4.3E-03 | 1.9E-01 | 1.5E-01 |
| GO:0060033 | GO:Bio L4  | anatomical structure regression                  | 3.3E-01 | 2.6E-01 | 1.1E-01 | 2.0E-01 | 5.6E-01 | 1.9E-01 | 4.2E-01 | 8.4E-01 | 5.0E-01 | 2.0E-01 | 1.9E-01 | 4.6E-01 |
| GO:0030656 | GO:Bio L4  | regulation of vitamin metabolic process          | 1.2E-02 | 2.3E-02 | 7.8E-02 | 7.0E-02 | 2.5E-01 | 5.5E-01 | 6.0E-01 | 2.2E-01 | 2.0E-02 | 6.8E-02 | 1.9E-01 | 8.1E-02 |
| GO:0019012 | GO:Cell L2 | virion                                           | 2.3E-01 | 2.5E-01 | 6.4E-01 | 5.4E-01 | 3.6E-01 | 4.5E-02 | 7.4E-02 | 3.7E-01 | 2.9E-01 | 6.2E-02 | 1.9E-01 | 5.2E-01 |
| GO:0044423 | GO:Cell L2 | virion part                                      | 2.3E-01 | 2.5E-01 | 6.4E-01 | 5.4E-01 | 3.6E-01 | 4.5E-02 | 7.4E-02 | 3.7E-01 | 2.9E-01 | 6.2E-02 | 1.9E-01 | 5.2E-01 |
| GO:0019028 | GO:Cell L4 | viral capsid                                     | 2.3E-01 | 2.5E-01 | 6.4E-01 | 5.4E-01 | 3.6E-01 | 4.5E-02 | 7.4E-02 | 3.7E-01 | 2.9E-01 | 6.2E-02 | 1.9E-01 | 5.2E-01 |
| GO:0006910 | GO:Bio L4  | phagocytosis, recognition                        | 6.4E-01 | 5.4E-01 | 9.9E-01 | 9.3E-01 | 2.6E-02 | 1.1E-01 | 4.8E-02 | 5.3E-01 | 8.5E-02 | 2.3E-01 | 1.9E-01 | 8.4E-01 |
| GO:0030595 | GO:Bio L4  | leukocyte chemotaxis                             | 4.5E-02 | 8.2E-02 | 7.1E-02 | 3.0E-02 | 3.2E-02 | 1.3E-01 | 6.6E-01 | 2.4E-01 | 1.1E-02 | 6.0E-02 | 1.9E-01 | 4.2E-02 |
| GO:0003013 | GO:Bio L4  | circulatory system process                       | 2.5E-01 | 5.4E-02 | 1.6E-01 | 2.9E-01 | 9.4E-02 | 5.7E-01 | 2.9E-01 | 1.4E-01 | 1.1E-01 | 1.4E-01 | 1.9E-01 | 1.7E-01 |
| GO:0016885 | GO:Mole L4 | ligase activity, forming carbon-carbon bonds     | 5.2E-01 | 5.2E-01 | 8.6E-01 | 6.6E-01 | 1.9E-01 | 4.2E-01 | 5.5E-02 | 4.6E-01 | 3.3E-01 | 5.5E-01 | 1.9E-01 | 6.7E-01 |



|            |            |                                                        |         |         |         |         |         |         |         |         |         |         |         |         |
|------------|------------|--------------------------------------------------------|---------|---------|---------|---------|---------|---------|---------|---------|---------|---------|---------|---------|
| GO:0048070 | GO:Bio L4  | regulation of pigmentation during development          | 1.4E-02 | 7.9E-03 | 1.2E-01 | 1.2E-01 | 4.2E-01 | 1.8E-01 | 4.1E-01 | 8.2E-01 | 3.6E-02 | 1.1E-02 | 1.9E-01 | 3.3E-01 |
| GO:0030677 | GO:Cell L4 | ribonuclease P complex                                 | 4.4E-01 | 7.3E-02 | 4.9E-02 | 8.5E-02 | 6.2E-01 | 9.3E-01 | 9.7E-01 | 1.2E-01 | 6.2E-01 | 2.5E-01 | 1.9E-01 | 5.9E-02 |
| GO:0048532 | GO:Bio L4  | anatomical structure arrangement                       | 1.6E-02 | 3.1E-01 | 3.1E-01 | 6.7E-01 | 7.2E-01 | 7.4E-01 | 1.5E-01 | 5.7E-01 | 6.2E-02 | 5.7E-01 | 1.9E-01 | 7.5E-01 |
| GO:0043900 | GO:Bio L4  | regulation of multi-organism process                   | 7.1E-02 | 1.5E-02 | 1.6E-01 | 1.6E-01 | 2.7E-01 | 8.1E-01 | 3.0E-01 | 6.6E-01 | 9.5E-02 | 6.7E-02 | 1.9E-01 | 3.5E-01 |
| GO:0051798 | GO:Bio L4  | positive regulation of hair follicle development       | 4.7E-01 | 2.1E-01 | 7.0E-01 | 4.3E-01 | 1.6E-01 | 2.9E-01 | 6.8E-02 | 2.4E-01 | 2.7E-01 | 2.3E-01 | 1.9E-01 | 3.3E-01 |
| GO:0016886 | GO:Mole L4 | ligase activity, forming phosphoric ester bonds        | 8.2E-01 | 7.6E-01 | 1.5E-01 | 2.3E-01 | 6.3E-01 | 6.6E-01 | 3.1E-01 | 7.9E-02 | 8.6E-01 | 8.5E-01 | 1.9E-01 | 9.2E-02 |
| GO:0060600 | GO:Bio L4  | dichotomous subdivision of an epithelial terminal unit | 4.1E-01 | 6.5E-01 | 2.4E-01 | 2.7E-01 | 5.7E-01 | 9.7E-01 | 2.0E-01 | 1.9E-01 | 5.8E-01 | 9.2E-01 | 1.9E-01 | 2.0E-01 |
| GO:0000170 | GO:Mole L4 | sphingosine hydroxylase activity                       | 3.0E-01 | 2.1E-01 | 8.1E-02 | 1.1E-01 | 6.1E-01 | 4.0E-01 | 5.9E-01 | 4.6E-01 | 4.9E-01 | 3.0E-01 | 1.9E-01 | 2.0E-01 |
| GO:0010573 | GO:Bio L4  | vascular endothelial growth factor production          | 2.7E-02 | 8.5E-02 | 2.2E-01 | 1.1E-01 | 6.7E-01 | 6.6E-01 | 2.2E-01 | 1.2E-01 | 9.0E-02 | 2.2E-01 | 1.9E-01 | 7.1E-02 |
| GO:0008148 | GO:Mole L4 | negative transcription elongation factor activity      | 1.8E-01 | 1.6E-01 | 9.7E-02 | 2.5E-01 | 5.9E-01 | 7.5E-01 | 5.0E-01 | 6.7E-01 | 3.5E-01 | 3.7E-01 | 1.9E-01 | 4.7E-01 |
| GO:0031490 | GO:Mole L4 | chromatin DNA binding                                  | 2.7E-01 | 1.6E-01 | 1.8E-01 | 3.0E-01 | 7.1E-01 | 2.3E-01 | 2.7E-01 | 3.7E-01 | 5.1E-01 | 1.6E-01 | 1.9E-01 | 3.6E-01 |
| GO:0060206 | GO:Bio L4  | estrous cycle phase                                    | 5.2E-01 | 6.5E-01 | 3.3E-01 | 3.8E-01 | 8.9E-01 | 9.4E-01 | 1.4E-01 | 8.4E-01 | 8.2E-01 | 9.1E-01 | 1.9E-01 | 6.8E-01 |
| GO:0032300 | GO:Cell L4 | mismatch repair complex                                | 2.0E-04 | 5.0E-04 | 1.4E-01 | 2.7E-01 | 6.5E-01 | 8.6E-01 | 3.5E-01 | 7.1E-01 | 1.3E-03 | 3.8E-03 | 2.0E-01 | 5.1E-01 |
| GO:0002262 | GO:Bio L4  | myeloid cell homeostasis                               | 1.9E-02 | 1.1E-02 | 9.0E-02 | 6.0E-02 | 8.1E-01 | 7.4E-01 | 5.4E-01 | 9.1E-01 | 8.0E-02 | 4.8E-02 | 2.0E-01 | 2.1E-01 |
| GO:0032579 | GO:Cell L4 | apical lamina of hyaline layer                         | 8.3E-02 | 1.3E-01 | 2.5E-01 | 1.1E-01 | 8.6E-01 | 9.3E-01 | 2.0E-01 | 5.9E-01 | 2.6E-01 | 3.7E-01 | 2.0E-01 | 2.4E-01 |
| GO:0008643 | GO:Bio L4  | carbohydrate transport                                 | 2.4E-01 | 3.7E-02 | 7.9E-01 | 6.1E-01 | 4.7E-02 | 4.0E-02 | 6.2E-02 | 6.3E-02 | 6.0E-02 | 1.1E-02 | 2.0E-01 | 1.6E-01 |
| GO:0009791 | GO:Bio L4  | post-embryonic development                             | 3.5E-01 | 2.5E-01 | 4.4E-01 | 4.8E-01 | 4.7E-01 | 8.8E-01 | 1.1E-01 | 8.2E-01 | 4.6E-01 | 5.6E-01 | 2.0E-01 | 7.6E-01 |
| GO:0060136 | GO:Bio L4  | embryonic process involved in female pregnancy         | 5.5E-01 | 3.6E-01 | 7.0E-02 | 1.6E-01 | 6.4E-01 | 5.3E-01 | 7.0E-01 | 8.1E-01 | 7.2E-01 | 5.0E-01 | 2.0E-01 | 3.9E-01 |
| GO:0051707 | GO:Bio L4  | response to other organism                             | 2.6E-01 | 1.1E-01 | 1.6E-01 | 4.9E-02 | 2.0E-01 | 2.4E-01 | 3.0E-01 | 6.0E-01 | 2.0E-01 | 1.3E-01 | 2.0E-01 | 1.3E-01 |
| GO:0060011 | GO:Bio L4  | Sertoli cell proliferation                             | 1.8E-01 | 3.8E-01 | 1.9E-01 | 1.5E-01 | 5.1E-01 | 2.2E-01 | 2.5E-01 | 4.6E-03 | 3.1E-01 | 2.9E-01 | 2.0E-01 | 5.7E-03 |
| GO:0005930 | GO:Cell L4 | axoneme                                                | 2.5E-01 | 2.4E-01 | 2.2E-01 | 1.6E-01 | 5.4E-01 | 1.2E-01 | 2.2E-01 | 5.6E-01 | 4.0E-01 | 1.4E-01 | 2.0E-01 | 3.0E-01 |

|            |            |                                                                         |         |         |         |         |         |         |         |         |         |         |         |         |
|------------|------------|-------------------------------------------------------------------------|---------|---------|---------|---------|---------|---------|---------|---------|---------|---------|---------|---------|
| GO:0045912 | GO:Bio L4  | negative regulation of carbohydrate metabolic process                   | 7.9E-01 | 6.1E-01 | 1.2E-01 | 4.0E-02 | 8.5E-01 | 8.4E-01 | 4.1E-01 | 9.5E-01 | 9.4E-01 | 8.6E-01 | 2.0E-01 | 1.6E-01 |
| GO:0005068 | GO:Mole L4 | transmembrane receptor protein tyrosine kinase adaptor protein activity | 7.9E-01 | 4.9E-01 | 6.0E-01 | 6.9E-01 | 5.6E-01 | 2.0E-01 | 8.3E-02 | 4.2E-01 | 8.0E-01 | 3.2E-01 | 2.0E-01 | 6.5E-01 |
| GO:0001562 | GO:Bio L4  | response to protozoan                                                   | 3.4E-01 | 3.4E-01 | 7.5E-01 | 6.6E-01 | 7.6E-02 | 1.6E-01 | 6.6E-02 | 2.4E-01 | 1.2E-01 | 2.2E-01 | 2.0E-01 | 4.5E-01 |
| GO:0048002 | GO:Bio L4  | antigen processing and presentation of peptide antigen                  | 1.3E-03 | 1.6E-03 | 5.7E-02 | 4.3E-02 | 8.6E-02 | 4.3E-02 | 8.7E-01 | 9.8E-01 | 1.1E-03 | 7.2E-04 | 2.0E-01 | 1.8E-01 |
| GO:0048500 | GO:Cell L4 | signal recognition particle                                             | 2.0E-01 | 3.6E-01 | 6.4E-01 | 6.3E-01 | 8.8E-01 | 7.4E-01 | 7.9E-02 | 6.6E-01 | 4.8E-01 | 6.2E-01 | 2.0E-01 | 7.8E-01 |
| GO:0035095 | GO:Bio L4  | behavioral response to nicotine                                         | 8.6E-01 | 4.3E-01 | 3.0E-01 | 4.0E-01 | 9.3E-01 | 8.2E-01 | 1.7E-01 | 7.0E-01 | 9.8E-01 | 7.2E-01 | 2.0E-01 | 6.3E-01 |
| GO:0001709 | GO:Bio L4  | cell fate determination                                                 | 6.1E-01 | 3.3E-01 | 6.7E-02 | 1.1E-01 | 6.9E-01 | 2.0E-01 | 7.6E-01 | 8.9E-01 | 7.8E-01 | 2.5E-01 | 2.0E-01 | 3.3E-01 |
| GO:0001948 | GO:Mole L4 | glycoprotein binding                                                    | 7.5E-01 | 5.0E-01 | 3.7E-01 | 3.2E-01 | 1.8E-01 | 1.8E-01 | 1.4E-01 | 1.4E-01 | 4.1E-01 | 3.1E-01 | 2.0E-01 | 1.8E-01 |
| GO:0001675 | GO:Bio L4  | acrosome assembly                                                       | 2.2E-01 | 1.1E-01 | 1.5E-01 | 1.4E-01 | 5.4E-01 | 8.6E-01 | 3.3E-01 | 2.0E-01 | 3.7E-01 | 3.2E-01 | 2.0E-01 | 1.3E-01 |
| 5320       | KEGG       | Autoimmune thyroid disease                                              | 5.3E-02 | 8.5E-02 | 1.5E-01 | 2.2E-01 | 2.1E-01 | 7.2E-01 | 3.4E-01 | 9.6E-01 | 6.1E-02 | 2.3E-01 | 2.0E-01 | 5.3E-01 |
| GO:0019059 | GO:Bio L4  | initiation of viral infection                                           | 7.8E-01 | 5.6E-01 | 7.3E-02 | 1.3E-01 | 9.9E-01 | 9.5E-01 | 7.0E-01 | 7.4E-01 | 9.7E-01 | 8.7E-01 | 2.0E-01 | 3.3E-01 |
| 5220       | KEGG       | Chronic myeloid leukemia                                                | 2.8E-01 | 4.3E-01 | 6.7E-01 | 8.6E-01 | 9.8E-01 | 6.3E-01 | 7.6E-02 | 1.2E-01 | 6.4E-01 | 6.2E-01 | 2.0E-01 | 3.3E-01 |
| GO:0010884 | GO:Bio L4  | positive regulation of lipid storage                                    | 2.4E-01 | 1.2E-01 | 2.9E-01 | 2.1E-01 | 2.8E-01 | 3.9E-01 | 1.8E-01 | 5.2E-01 | 2.4E-01 | 1.9E-01 | 2.0E-01 | 3.5E-01 |
| GO:0032972 | GO:Bio L4  | regulation of muscle filament sliding speed                             | 2.4E-01 | 2.6E-01 | 1.5E-01 | 1.6E-01 | 4.1E-01 | 7.7E-01 | 3.5E-01 | 9.0E-01 | 3.3E-01 | 5.2E-01 | 2.0E-01 | 4.2E-01 |
| GO:0070469 | GO:Cell L4 | respiratory chain                                                       | 6.5E-01 | 4.0E-01 | 4.3E-01 | 4.0E-01 | 8.4E-01 | 2.1E-01 | 1.2E-01 | 1.3E-01 | 8.8E-01 | 2.9E-01 | 2.0E-01 | 2.0E-01 |
| GO:0022804 | GO:Mole L4 | active transmembrane transporter activity                               | 1.7E-01 | 6.7E-02 | 5.1E-01 | 2.3E-01 | 8.4E-01 | 3.5E-01 | 1.0E-01 | 5.5E-01 | 4.3E-01 | 1.1E-01 | 2.0E-01 | 3.9E-01 |
| GO:0043027 | GO:Mole L4 | caspase inhibitor activity                                              | 2.0E-02 | 9.5E-03 | 1.1E-01 | 2.0E-01 | 1.9E-01 | 1.3E-01 | 4.5E-01 | 9.9E-01 | 2.4E-02 | 9.6E-03 | 2.0E-01 | 5.2E-01 |
| GO:0010888 | GO:Bio L4  | negative regulation of lipid storage                                    | 1.5E-01 | 4.1E-01 | 5.8E-01 | 4.2E-01 | 3.0E-01 | 4.9E-01 | 8.8E-02 | 9.0E-01 | 1.9E-01 | 5.3E-01 | 2.0E-01 | 7.5E-01 |
| GO:0009629 | GO:Bio L4  | response to gravity                                                     | 1.6E-01 | 4.1E-01 | 8.4E-02 | 2.2E-01 | 9.5E-01 | 9.0E-01 | 6.2E-01 | 4.9E-01 | 4.3E-01 | 7.4E-01 | 2.0E-01 | 3.5E-01 |
| GO:0021670 | GO:Bio L4  | lateral ventricle development                                           | 4.4E-01 | 6.2E-01 | 6.0E-02 | 1.2E-01 | 6.3E-01 | 5.0E-01 | 8.5E-01 | 7.1E-01 | 6.3E-01 | 6.7E-01 | 2.0E-01 | 2.9E-01 |
| GO:0035287 | GO:Bio L4  | head segmentation                                                       | 4.4E-01 | 6.2E-01 | 6.0E-02 | 1.2E-01 | 6.3E-01 | 5.0E-01 | 8.5E-01 | 7.1E-01 | 6.3E-01 | 6.7E-01 | 2.0E-01 | 2.9E-01 |
| GO:0048857 | GO:Bio L4  | neural nucleus development                                              | 5.5E-02 | 2.2E-01 | 4.5E-01 | 8.0E-01 | 8.8E-01 | 6.5E-01 | 1.2E-01 | 7.5E-01 | 1.9E-01 | 4.2E-01 | 2.1E-01 | 9.1E-01 |
| GO:0001819 | GO:Bio L4  | positive regulation of cytokine production                              | 5.3E-02 | 1.9E-01 | 1.9E-01 | 4.3E-02 | 2.7E-01 | 2.6E-01 | 2.8E-01 | 2.0E-01 | 7.5E-02 | 2.0E-01 | 2.1E-01 | 5.0E-02 |

|             |            |                                                                     |         |         |         |         |         |         |         |         |         |         |         |         |
|-------------|------------|---------------------------------------------------------------------|---------|---------|---------|---------|---------|---------|---------|---------|---------|---------|---------|---------|
| GO:0010890  | GO:Bio L4  | positive regulation of sequestering of triglyceride                 | 5.6E-02 | 2.2E-02 | 9.0E-02 | 6.4E-02 | 6.4E-01 | 4.5E-01 | 5.8E-01 | 4.1E-01 | 1.5E-01 | 5.5E-02 | 2.1E-01 | 1.2E-01 |
| GO:0002209  | GO:Bio L4  | behavioral defense response                                         | 2.9E-02 | 5.0E-02 | 9.4E-02 | 1.6E-01 | 2.1E-01 | 6.4E-01 | 5.5E-01 | 7.7E-01 | 3.6E-02 | 1.4E-01 | 2.1E-01 | 3.9E-01 |
| GO:0043511  | GO:Cell L4 | inhibin complex                                                     | 2.7E-01 | 2.1E-01 | 1.8E-01 | 1.6E-01 | 8.7E-01 | 8.6E-01 | 2.8E-01 | 8.0E-01 | 5.7E-01 | 4.8E-01 | 2.1E-01 | 3.9E-01 |
| GO:0043512  | GO:Cell L4 | inhibin A complex                                                   | 2.7E-01 | 2.1E-01 | 1.8E-01 | 1.6E-01 | 8.7E-01 | 8.6E-01 | 2.8E-01 | 8.0E-01 | 5.7E-01 | 4.8E-01 | 2.1E-01 | 3.9E-01 |
| GO:0005932  | GO:Cell L4 | microtubule basal body                                              | 2.8E-01 | 2.6E-01 | 1.8E-01 | 1.8E-01 | 6.0E-01 | 3.6E-01 | 2.9E-01 | 9.5E-01 | 4.7E-01 | 3.2E-01 | 2.1E-01 | 4.8E-01 |
| GO:0016840  | GO:Mole L4 | carbon-nitrogen lyase activity                                      | 1.7E-01 | 1.5E-01 | 8.6E-02 | 3.0E-01 | 2.1E-01 | 2.6E-01 | 6.1E-01 | 4.9E-01 | 1.6E-01 | 1.7E-01 | 2.1E-01 | 4.3E-01 |
| 4320        | KEGG       | Dorso-ventral axis formation                                        | 4.0E-01 | 1.6E-01 | 7.4E-01 | 6.8E-01 | 3.1E-01 | 7.1E-01 | 7.0E-02 | 2.1E-02 | 3.8E-01 | 3.5E-01 | 2.1E-01 | 7.6E-02 |
| GO:0044438  | GO:Cell L4 | microbody part                                                      | 9.8E-01 | 9.5E-01 | 5.5E-01 | 4.7E-01 | 6.2E-01 | 3.2E-01 | 9.5E-02 | 1.3E-01 | 9.1E-01 | 6.6E-01 | 2.1E-01 | 2.3E-01 |
| GO:0033116  | GO:Cell L4 | ER-Golgi intermediate compartment membrane                          | 8.0E-01 | 8.6E-01 | 2.0E-01 | 2.1E-01 | 9.9E-02 | 3.0E-02 | 2.6E-01 | 6.8E-01 | 2.8E-01 | 1.2E-01 | 2.1E-01 | 4.1E-01 |
| GO:0060135  | GO:Bio L4  | maternal process involved in female pregnancy                       | 3.6E-01 | 9.2E-01 | 7.0E-02 | 6.8E-02 | 4.9E-01 | 8.4E-02 | 7.5E-01 | 6.7E-02 | 4.8E-01 | 2.8E-01 | 2.1E-01 | 2.9E-02 |
| GO:0006998  | GO:Bio L4  | nuclear envelope organization                                       | 1.9E-01 | 1.8E-01 | 1.9E-01 | 1.3E-01 | 8.2E-01 | 7.5E-01 | 2.7E-01 | 1.9E-01 | 4.5E-01 | 4.1E-01 | 2.1E-01 | 1.2E-01 |
| GO:0008217  | GO:Bio L4  | regulation of blood pressure                                        | 1.4E-01 | 1.4E-02 | 7.1E-02 | 1.5E-01 | 4.5E-01 | 3.5E-01 | 7.4E-01 | 1.1E-01 | 2.4E-01 | 3.0E-02 | 2.1E-01 | 8.9E-02 |
| GO:0051960  | GO:Bio L4  | regulation of nervous system development                            | 2.5E-02 | 1.0E-02 | 6.8E-01 | 5.2E-01 | 2.5E-02 | 3.7E-01 | 7.7E-02 | 8.6E-01 | 5.3E-03 | 2.5E-02 | 2.1E-01 | 8.0E-01 |
| PA153627758 | PharmGKB   | pgkb_pwy_Anti_diabetic_drug_pathway_Potassium_channel_inhibitors_PD | 5.8E-02 | 9.5E-02 | 2.4E-01 | 2.5E-01 | 7.7E-01 | 2.2E-01 | 2.2E-01 | 3.6E-01 | 1.9E-01 | 1.0E-01 | 2.1E-01 | 3.0E-01 |
| GO:0000159  | GO:Cell L4 | protein phosphatase type 2A complex                                 | 7.2E-01 | 3.9E-01 | 9.6E-01 | 8.5E-01 | 7.7E-01 | 4.7E-01 | 5.5E-02 | 4.8E-01 | 8.8E-01 | 4.9E-01 | 2.1E-01 | 7.7E-01 |
| GO:0006519  | GO:Bio L4  | cellular amino acid and derivative metabolic process                | 8.3E-01 | 4.4E-01 | 3.1E-01 | 2.2E-01 | 9.7E-02 | 3.1E-01 | 1.7E-01 | 2.2E-01 | 2.8E-01 | 4.1E-01 | 2.1E-01 | 2.0E-01 |
| GO:0070201  | GO:Bio L4  | regulation of establishment of protein localization                 | 9.4E-02 | 5.3E-02 | 3.4E-01 | 1.7E-01 | 2.6E-01 | 3.9E-01 | 1.6E-01 | 7.7E-01 | 1.2E-01 | 9.9E-02 | 2.1E-01 | 3.9E-01 |
| GO:0008267  | GO:Mole L4 | poly-glutamine tract binding                                        | 8.0E-01 | 4.8E-01 | 7.8E-01 | 7.1E-01 | 4.7E-01 | 2.7E-01 | 6.8E-02 | 8.8E-01 | 7.4E-01 | 4.0E-01 | 2.1E-01 | 9.2E-01 |
| GO:0010149  | GO:Bio L4  | senescence                                                          | 4.1E-02 | 8.1E-02 | 2.7E-01 | 2.4E-01 | 3.4E-01 | 7.6E-02 | 2.0E-01 | 1.2E-01 | 7.3E-02 | 3.7E-02 | 2.1E-01 | 1.3E-01 |
| GO:0016725  | GO:Mole L4 | oxidoreductase activity, acting on CH or CH2 groups                 | 9.7E-01 | 1.0E+00 | 3.9E-01 | 6.0E-01 | 2.5E-01 | 4.0E-01 | 1.3E-01 | 9.3E-01 | 5.9E-01 | 7.7E-01 | 2.1E-01 | 8.9E-01 |

|            |            |                                               |         |         |         |         |         |         |         |         |         |         |         |         |
|------------|------------|-----------------------------------------------|---------|---------|---------|---------|---------|---------|---------|---------|---------|---------|---------|---------|
| GO:0014042 | GO:Bio L4  | positive regulation of neuron maturation      | 1.1E-01 | 1.5E-01 | 5.1E-01 | 3.4E-01 | 4.7E-01 | 2.2E-01 | 1.0E-01 | 5.4E-01 | 2.0E-01 | 1.5E-01 | 2.1E-01 | 4.9E-01 |
| GO:0019740 | GO:Bio L4  | nitrogen utilization                          | 1.1E-01 | 1.5E-01 | 5.1E-01 | 3.4E-01 | 4.7E-01 | 2.2E-01 | 1.0E-01 | 5.4E-01 | 2.0E-01 | 1.5E-01 | 2.1E-01 | 4.9E-01 |
| GO:0032848 | GO:Bio L4  | negative regulation of cellular pH reduction  | 1.1E-01 | 1.5E-01 | 5.1E-01 | 3.4E-01 | 4.7E-01 | 2.2E-01 | 1.0E-01 | 5.4E-01 | 2.0E-01 | 1.5E-01 | 2.1E-01 | 4.9E-01 |
| GO:0006880 | GO:Bio L4  | intracellular sequestering of iron ion        | 6.6E-01 | 6.9E-01 | 6.6E-01 | 5.8E-01 | 3.4E-01 | 2.6E-01 | 8.2E-02 | 6.2E-01 | 5.6E-01 | 4.9E-01 | 2.1E-01 | 7.2E-01 |
| GO:0004325 | GO:Mole L4 | ferrochelatase activity                       | 6.6E-01 | 8.0E-01 | 2.4E-01 | 1.8E-01 | 4.6E-01 | 2.9E-01 | 2.2E-01 | 6.1E-01 | 6.7E-01 | 5.6E-01 | 2.1E-01 | 3.5E-01 |
| GO:0016507 | GO:Cell L4 | fatty acid beta-oxidation multienzyme complex | 1.7E-01 | 4.0E-01 | 8.5E-01 | 8.0E-01 | 6.3E-01 | 5.0E-01 | 6.3E-02 | 4.0E-01 | 3.5E-01 | 5.2E-01 | 2.1E-01 | 6.9E-01 |
| GO:0032204 | GO:Bio L4  | regulation of telomere maintenance            | 7.4E-01 | 6.1E-01 | 4.9E-01 | 7.4E-01 | 9.0E-02 | 2.6E-01 | 1.1E-01 | 1.5E-01 | 2.5E-01 | 4.5E-01 | 2.1E-01 | 3.6E-01 |
| GO:0005521 | GO:Mole L4 | lamin binding                                 | 7.0E-03 | 1.8E-02 | 1.1E-01 | 8.3E-02 | 7.9E-01 | 7.2E-01 | 5.1E-01 | 2.2E-01 | 3.4E-02 | 6.9E-02 | 2.1E-01 | 9.1E-02 |
| GO:0016875 | GO:Mole L4 | ligase activity, forming carbon-oxygen bonds  | 7.4E-01 | 8.4E-01 | 7.9E-01 | 7.5E-01 | 4.3E-01 | 6.6E-01 | 6.9E-02 | 6.7E-01 | 6.9E-01 | 8.8E-01 | 2.1E-01 | 8.5E-01 |
| GO:0010886 | GO:Bio L4  | positive regulation of cholesterol storage    | 6.5E-01 | 8.9E-01 | 5.9E-01 | 4.5E-01 | 1.5E-01 | 2.4E-01 | 9.2E-02 | 3.7E-01 | 3.2E-01 | 5.5E-01 | 2.1E-01 | 4.7E-01 |
| GO:0009991 | GO:Bio L4  | response to extracellular stimulus            | 4.9E-01 | 1.1E-01 | 5.0E-01 | 3.1E-01 | 8.4E-01 | 3.9E-01 | 1.1E-01 | 8.9E-01 | 7.8E-01 | 1.8E-01 | 2.1E-01 | 6.3E-01 |
| GO:0010623 | GO:Bio L4  | developmental programmed cell death           | 5.2E-01 | 8.2E-01 | 5.3E-01 | 5.4E-01 | 2.2E-01 | 2.8E-01 | 1.0E-01 | 4.1E-01 | 3.6E-01 | 5.7E-01 | 2.1E-01 | 5.5E-01 |
| GO:0009308 | GO:Bio L4  | amine metabolic process                       | 6.6E-01 | 2.9E-01 | 1.5E-01 | 1.3E-01 | 1.6E-01 | 5.8E-01 | 3.6E-01 | 1.9E-01 | 3.4E-01 | 4.7E-01 | 2.1E-01 | 1.2E-01 |
| GO:0030238 | GO:Bio L4  | male sex determination                        | 5.9E-01 | 7.3E-01 | 8.1E-02 | 1.4E-01 | 9.0E-01 | 9.1E-01 | 6.7E-01 | 5.5E-01 | 8.7E-01 | 9.4E-01 | 2.1E-01 | 2.7E-01 |
| 3320       | KEGG       | PPAR signaling pathway                        | 4.6E-01 | 1.0E-01 | 8.7E-01 | 9.2E-01 | 1.5E-02 | 8.2E-03 | 6.3E-02 | 1.6E-01 | 4.0E-02 | 6.7E-03 | 2.1E-01 | 4.3E-01 |
| GO:0042605 | GO:Mole L4 | peptide antigen binding                       | 5.0E-01 | 4.9E-01 | 1.3E-01 | 1.2E-01 | 3.5E-01 | 6.0E-02 | 4.1E-01 | 6.6E-01 | 4.7E-01 | 1.3E-01 | 2.1E-01 | 2.9E-01 |
| 4670       | KEGG       | Leukocyte transendothelial migration          | 4.0E-01 | 4.3E-01 | 3.7E-01 | 2.3E-01 | 1.1E-01 | 4.8E-02 | 1.5E-01 | 1.1E-01 | 1.8E-01 | 1.0E-01 | 2.1E-01 | 1.2E-01 |
| GO:0009268 | GO:Bio L4  | response to pH                                | 1.1E-01 | 1.6E-01 | 9.3E-02 | 8.9E-02 | 8.3E-01 | 7.2E-01 | 5.9E-01 | 6.2E-02 | 3.0E-01 | 3.6E-01 | 2.1E-01 | 3.4E-02 |
| 4940       | KEGG       | Type I diabetes mellitus                      | 1.8E-02 | 1.6E-02 | 1.0E-01 | 4.0E-02 | 2.4E-01 | 7.0E-01 | 5.5E-01 | 4.3E-01 | 2.7E-02 | 6.0E-02 | 2.1E-01 | 8.7E-02 |
| GO:0045823 | GO:Bio L4  | positive regulation of heart contraction      | 3.5E-01 | 9.6E-02 | 6.9E-02 | 1.8E-01 | 7.2E-01 | 8.0E-01 | 8.0E-01 | 3.3E-01 | 5.9E-01 | 2.7E-01 | 2.1E-01 | 2.3E-01 |
| GO:0043383 | GO:Bio L4  | negative T cell selection                     | 5.2E-01 | 4.1E-01 | 3.8E-01 | 8.0E-01 | 9.6E-01 | 7.1E-01 | 1.4E-01 | 4.1E-01 | 8.5E-01 | 6.4E-01 | 2.1E-01 | 6.9E-01 |
| GO:0016051 | GO:Bio L4  | carbohydrate biosynthetic process             | 3.2E-01 | 2.1E-01 | 6.8E-02 | 2.5E-01 | 5.2E-01 | 2.4E-01 | 8.1E-01 | 1.6E-01 | 4.6E-01 | 2.0E-01 | 2.2E-01 | 1.7E-01 |

|            |            |                                      |         |         |         |         |         |         |         |         |         |         |         |         |
|------------|------------|--------------------------------------|---------|---------|---------|---------|---------|---------|---------|---------|---------|---------|---------|---------|
| GO:0044255 | GO:Bio L4  | cellular lipid metabolic process     | 3.9E-01 | 2.0E-01 | 5.8E-01 | 7.7E-01 | 6.2E-02 | 1.0E-01 | 9.5E-02 | 5.7E-01 | 1.1E-01 | 9.8E-02 | 2.2E-01 | 8.0E-01 |
| GO:0007411 | GO:Bio L4  | axon guidance                        | 4.7E-01 | 2.8E-01 | 1.8E-01 | 4.6E-01 | 3.6E-01 | 5.0E-02 | 3.1E-01 | 6.4E-01 | 4.7E-01 | 7.4E-02 | 2.2E-01 | 6.5E-01 |
| GO:0005602 | GO:Cell L4 | complement component C1 complex      | 6.5E-01 | 3.4E-01 | 1.6E-01 | 2.0E-01 | 8.0E-02 | 3.9E-01 | 3.5E-01 | 2.7E-01 | 2.1E-01 | 4.0E-01 | 2.2E-01 | 2.1E-01 |
| GO:0008250 | GO:Cell L4 | oligosaccharyltransferase complex    | 8.6E-01 | 8.4E-01 | 2.6E-01 | 3.9E-01 | 8.6E-01 | 7.4E-01 | 2.1E-01 | 6.2E-01 | 9.6E-01 | 9.2E-01 | 2.2E-01 | 5.8E-01 |
| 565        | KEGG       | Ether lipid metabolism               | 3.1E-01 | 3.2E-01 | 2.2E-01 | 5.0E-01 | 7.6E-02 | 4.6E-01 | 2.5E-01 | 7.0E-03 | 1.1E-01 | 4.3E-01 | 2.2E-01 | 2.3E-02 |
| GO:0070761 | GO:Cell L4 | pre-snoRNP complex                   | 5.8E-01 | 1.7E-01 | 2.6E-01 | 3.2E-01 | 5.7E-01 | 8.8E-01 | 2.2E-01 | 1.2E-01 | 7.0E-01 | 4.4E-01 | 2.2E-01 | 1.7E-01 |
| GO:0010853 | GO:Mole L4 | cyclase activator activity           | 5.8E-02 | 3.4E-01 | 1.2E-01 | 6.9E-02 | 4.5E-01 | 5.2E-01 | 4.7E-01 | 6.6E-01 | 1.2E-01 | 4.8E-01 | 2.2E-01 | 1.9E-01 |
| GO:0030250 | GO:Mole L4 | guanylate cyclase activator activity | 5.8E-02 | 3.4E-01 | 1.2E-01 | 6.9E-02 | 4.5E-01 | 5.2E-01 | 4.7E-01 | 6.6E-01 | 1.2E-01 | 4.8E-01 | 2.2E-01 | 1.9E-01 |
| GO:0022900 | GO:Bio L4  | electron transport chain             | 5.1E-01 | 3.1E-01 | 5.0E-01 | 5.7E-01 | 1.7E-01 | 7.3E-02 | 1.1E-01 | 4.6E-02 | 3.0E-01 | 1.1E-01 | 2.2E-01 | 1.2E-01 |
